# Supplementary material for: Investigating the Pavement Vibration Response for Roadway Service Condition Evaluation
Source: Hindawi journal article supplement (doi:10.1155/2018/2714657), 2018-01-01
Supplement: f1 [file 2714657.f1.zip]

Archive with 10 entries (9 files):
- data/Figure11.xlsx
- data/Figure13 and Figure15/
- data/Figure13 and Figure15/frequency_domain.xlsx
- data/Figure13 and Figure15/time_domain.xlsx
- data/Figure2.xlsx
- data/Figure8.xlsx
- data/Figure9.xlsx
- references/.pdf
- references/A Wireless Accelerometer-Based Automatic Vehicle Classification Prototype System.pdf
- references/P117-118.caj
