# Supplementary material for: Investigating the Pavement Vibration Response for Roadway Service Condition Evaluation
Source: Hindawi journal article supplement (doi:10.1155/2018/2714657), 2018-01-01
Supplement: f1 [file 2714657.f1.zip › data/Figure2.xlsx]

## Sheet: Sheet1
0	0	49169.1
0.001	0.01	49007.5
0.002	0.02	49192.8
0.003	0.03	49393.7
0.004	0.04	49435.8
0.005	0.05	48965.1
0.006	0.06	49051.8
0.007	0.07	48274.3
0.008	0.08	48000.5
0.009	0.09	48710.8
0.01	0.1	48743.6
0.011	0.11	47727.4
0.012	0.12	47611
0.013	0.13	47826.5
0.014	0.14	48282.9
0.015	0.15	48611.3
0.016	0.16	48819
0.017	0.17	48870.9
0.018	0.18	48503.5
0.019	0.19	48745.2
0.02	0.2	48525.5
0.021	0.21	48506.4
0.022	0.22	47829.8
0.023	0.23	48401.8
0.024	0.24	49076.2
0.025	0.25	48257.2
0.026	0.26	48583.6
0.027	0.27	48950.5
0.028	0.28	48931.4
0.029	0.29	48433.2
0.03	0.3	48020.5
0.031	0.31	48048.4
0.032	0.32	48270.6
0.033	0.33	48692.8
0.034	0.34	48325.2
0.035	0.35	48221.9
0.036	0.36	48481.9
0.037	0.37	47745.3
0.038	0.38	48655.9
0.039	0.39	49567.1
0.04	0.4	50307
0.041	0.41	50579.9
0.042	0.42	50842.3
0.043	0.43	51322.7
0.044	0.44	52057.4
0.045	0.45	53371.9
0.046	0.46	53694.7
0.047	0.47	53555.4
0.048	0.48	52986.1
0.049	0.49	53065.2
0.05	0.5	53233.5
0.051	0.51	52735.4
0.052	0.52	52284.3
0.053	0.53	52606.7
0.054	0.54	52377.8
0.055	0.55	52790.4
0.056	0.56	52370.2
0.057	0.57	51619.5
0.058	0.58	51659
0.059	0.59	51546.8
0.06	0.6	50884.1
0.061	0.61	50726.5
0.062	0.62	50827.8
0.063	0.63	50468.5
0.064	0.64	50279.6
0.065	0.65	50013.9
0.066	0.66	49389
0.067	0.67	49360.5
0.068	0.68	50076
0.069	0.69	50097
0.07	0.7	49508.9
0.071	0.71	50077.8
0.072	0.72	50008
0.073	0.73	50588.1
0.074	0.74	49856.3
0.075	0.75	50295
0.076	0.76	50040.4
0.077	0.77	49242.8
0.078	0.78	49452.8
0.079	0.79	49635.6
0.08	0.8	49437.8
0.081	0.81	48600.2
0.082	0.82	48579.3
0.083	0.83	49162.2
0.084	0.84	49318.4
0.085	0.85	50089.8
0.086	0.86	48968.4
0.087	0.87	48003.3
0.088	0.88	48367.6
0.089	0.89	48666
0.09	0.9	48463.9
0.091	0.91	48630
0.092	0.92	49221.1
0.093	0.93	49626.2
0.094	0.94	49544.7
0.095	0.95	49849
0.096	0.96	50036.9
0.097	0.97	50210.3
0.098	0.98	49933.2
0.099	0.99	49714.2
0.1	1	50327.2
0.101	1.01	49492.6
0.102	1.02	49641.4
0.103	1.03	49890.3
0.104	1.04	50697.3
0.105	1.05	49803.4
0.106	1.06	49622
0.107	1.07	49110.4
0.108	1.08	48407.1
0.109	1.09	47717.8
0.11	1.1	47650.3
0.111	1.11	47901.6
0.112	1.12	47801.2
0.113	1.13	48065.5
0.114	1.14	47923.4
0.115	1.15	48008.9
0.116	1.16	47435.2
0.117	1.17	48113.4
0.118	1.18	47698.1
0.119	1.19	47554.9
0.12	1.2	46664
0.121	1.21	46373.4
0.122	1.22	46494.6
0.123	1.23	46908.6
0.124	1.24	46941.8
0.125	1.25	47444.9
0.126	1.26	48050.8
0.127	1.27	48014.1
0.128	1.28	48234.4
0.129	1.29	48032.7
0.13	1.3	48901.3
0.131	1.31	48886.8
0.132	1.32	50079.2
0.133	1.33	50115.1
0.134	1.34	50476.3
0.135	1.35	50052
0.136	1.36	50396.4
0.137	1.37	50130.4
0.138	1.38	50022.3
0.139	1.39	50771.1
0.14	1.4	50056
0.141	1.41	50661.8
0.142	1.42	50031.8
0.143	1.43	49390
0.144	1.44	49646.1
0.145	1.45	49557.2
0.146	1.46	49469.4
0.147	1.47	49803.2
0.148	1.48	50018
0.149	1.49	50516.2
0.15	1.5	51034.3
0.151	1.51	52162.6
0.152	1.52	52255.1
0.153	1.53	52105.4
0.154	1.54	51927.2
0.155	1.55	52918.2
0.156	1.56	52200.8
0.157	1.57	52487.1
0.158	1.58	52410.8
0.159	1.59	51996.5
0.16	1.6	52159.4
0.161	1.61	51963.4
0.162	1.62	51859.3
0.163	1.63	52617.1
0.164	1.64	51679
0.165	1.65	51358
0.166	1.66	51447.5
0.167	1.67	51425.8
0.168	1.68	50502.3
0.169	1.69	50708.2
0.17	1.7	49545.9
0.171	1.71	49583.4
0.172	1.72	48972.8
0.173	1.73	49034.3
0.174	1.74	48131.1
0.175	1.75	47537
0.176	1.76	48168.4
0.177	1.77	48597.1
0.178	1.78	48385.8
0.179	1.79	47898.3
0.18	1.8	47685.8
0.181	1.81	46789
0.182	1.82	47266.5
0.183	1.83	46804.3
0.184	1.84	46242.3
0.185	1.85	45555
0.186	1.86	46261.6
0.187	1.87	46011
0.188	1.88	46046.5
0.189	1.89	45510.4
0.19	1.9	44967.3
0.191	1.91	44555.8
0.192	1.92	44967.5
0.193	1.93	44905.2
0.194	1.94	44887.1
0.195	1.95	44629
0.196	1.96	44146.4
0.197	1.97	45283.2
0.198	1.98	45339.9
0.199	1.99	45458.7
0.2	2	45316.7
0.201	2.01	45146.1
0.202	2.02	45798.5
0.203	2.03	46257.5
0.204	2.04	45964
0.205	2.05	46356.9
0.206	2.06	46452
0.207	2.07	46271.9
0.208	2.08	45725.2
0.209	2.09	46147.5
0.21	2.1	45917.3
0.211	2.11	46168
0.212	2.12	46198.8
0.213	2.13	46264
0.214	2.14	46692.1
0.215	2.15	46427.9
0.216	2.16	46895
0.217	2.17	47589.7
0.218	2.18	47387.3
0.219	2.19	46859.8
0.22	2.2	46665.8
0.221	2.21	46511.9
0.222	2.22	46941.7
0.223	2.23	47372.8
0.224	2.24	46708.8
0.225	2.25	46534
0.226	2.26	47203.2
0.227	2.27	47432.9
0.228	2.28	47413.1
0.229	2.29	47647.5
0.23	2.3	47661.6
0.231	2.31	47707
0.232	2.32	47644.3
0.233	2.33	47865.3
0.234	2.34	47764.2
0.235	2.35	48437.8
0.236	2.36	48022.7
0.237	2.37	47179.2
0.238	2.38	46876.3
0.239	2.39	46602.5
0.24	2.4	47687.2
0.241	2.41	48014.2
0.242	2.42	48710.1
0.243	2.43	48714.6
0.244	2.44	48391.8
0.245	2.45	48155.1
0.246	2.46	47889.2
0.247	2.47	47660.6
0.248	2.48	47890.1
0.249	2.49	48193
0.25	2.5	48042
0.251	2.51	47736.5
0.252	2.52	47529.6
0.253	2.53	47738.4
0.254	2.54	46113.4
0.255	2.55	46869.4
0.256	2.56	47358.7
0.257	2.57	46592.6
0.258	2.58	46242.8
0.259	2.59	47731.8
0.26	2.6	48262.5
0.261	2.61	49076
0.262	2.62	49286.2
0.263	2.63	48789.2
0.264	2.64	48527.6
0.265	2.65	47771.8
0.266	2.66	47085
0.267	2.67	47568
0.268	2.68	46647.6
0.269	2.69	46184
0.27	2.7	46751
0.271	2.71	46224.4
0.272	2.72	46928.9
0.273	2.73	45878.6
0.274	2.74	45243.2
0.275	2.75	44152.7
0.276	2.76	44292.3
0.277	2.77	44443.8
0.278	2.78	43695.1
0.279	2.79	43924
0.28	2.8	43921.9
0.281	2.81	43552.3
0.282	2.82	43681
0.283	2.83	43564.5
0.284	2.84	43772.2
0.285	2.85	45195.8
0.286	2.86	44702.7
0.287	2.87	43906.8
0.288	2.88	44254.6
0.289	2.89	44550.7
0.29	2.9	43384.6
0.291	2.91	44092.2
0.292	2.92	43804.6
0.293	2.93	43455.9
0.294	2.94	44707.1
0.295	2.95	45417.2
0.296	2.96	46544.1
0.297	2.97	46913.4
0.298	2.98	46712.8
0.299	2.99	47104.8
0.3	3	46764.8
0.301	3.01	47147.9
0.302	3.02	46434.9
0.303	3.03	47334
0.304	3.04	47501.4
0.305	3.05	48740.1
0.306	3.06	48778.1
0.307	3.07	48307.1
0.308	3.08	49038.3
0.309	3.09	49272.5
0.31	3.1	49664.9
0.311	3.11	49613.3
0.312	3.12	50851.6
0.313	3.13	51079.7
0.314	3.14	51281.2
0.315	3.15	51454.9
0.316	3.16	51310.1
0.317	3.17	51881.1
0.318	3.18	51587.4
0.319	3.19	50456.3
0.32	3.2	49883.7
0.321	3.21	50208.6
0.322	3.22	50178.6
0.323	3.23	50298
0.324	3.24	50163.7
0.325	3.25	50581.9
0.326	3.26	49616
0.327	3.27	49443.2
0.328	3.28	49636.8
0.329	3.29	48582.9
0.33	3.3	49584.1
0.331	3.31	48922.1
0.332	3.32	48869.7
0.333	3.33	48375
0.334	3.34	48061.6
0.335	3.35	48411.1
0.336	3.36	49051.8
0.337	3.37	48906.4
0.338	3.38	48958.8
0.339	3.39	49714.7
0.34	3.4	50147.6
0.341	3.41	50147.8
0.342	3.42	49714.7
0.343	3.43	50067.9
0.344	3.44	49343
0.345	3.45	49317.8
0.346	3.46	49852.7
0.347	3.47	50763
0.348	3.48	52145.1
0.349	3.49	51696.2
0.35	3.5	51351.2
0.351	3.51	51989.4
0.352	3.52	51355.8
0.353	3.53	50419.6
0.354	3.54	49752.1
0.355	3.55	50162.2
0.356	3.56	49313
0.357	3.57	49011.1
0.358	3.58	49233.3
0.359	3.59	48764.8
0.36	3.6	49163.9
0.361	3.61	49016.2
0.362	3.62	49087.6
0.363	3.63	48878.8
0.364	3.64	49063.5
0.365	3.65	48017.2
0.366	3.66	47711.6
0.367	3.67	48547.7
0.368	3.68	48235.4
0.369	3.69	48207.3
0.37	3.7	47863.8
0.371	3.71	48676.2
0.372	3.72	48910.5
0.373	3.73	48853.8
0.374	3.74	48967
0.375	3.75	48455
0.376	3.76	48991.2
0.377	3.77	48985
0.378	3.78	48473.1
0.379	3.79	48498.7
0.38	3.8	48860.3
0.381	3.81	48452.5
0.382	3.82	48548.8
0.383	3.83	48961.2
0.384	3.84	49712.1
0.385	3.85	49852.6
0.386	3.86	49312.6
0.387	3.87	48499.6
0.388	3.88	48208.6
0.389	3.89	47925.8
0.39	3.9	47908
0.391	3.91	48403.6
0.392	3.92	48170.7
0.393	3.93	48388.9
0.394	3.94	47980.1
0.395	3.95	47963.7
0.396	3.96	48517.5
0.397	3.97	49468.4
0.398	3.98	49342.2
0.399	3.99	49880.9
0.4	4	49750.6
0.401	4.01	50105.6
0.402	4.02	49793.2
0.403	4.03	49214.2
0.404	4.04	49705.1
0.405	4.05	49226.5
0.406	4.06	49400
0.407	4.07	49556
0.408	4.08	49335.3
0.409	4.09	48843.8
0.41	4.1	47976.7
0.411	4.11	47749.2
0.412	4.12	48046.2
0.413	4.13	47455.8
0.414	4.14	47575.7
0.415	4.15	46976.7
0.416	4.16	47855
0.417	4.17	47815.7
0.418	4.18	48552.3
0.419	4.19	48964.6
0.42	4.2	49327.8
0.421	4.21	49483.5
0.422	4.22	50050.3
0.423	4.23	50717.3
0.424	4.24	50711.8
0.425	4.25	50856.9
0.426	4.26	50591.6
0.427	4.27	50620.8
0.428	4.28	51246.9
0.429	4.29	51328.6
0.43	4.3	50870.9
0.431	4.31	51731
0.432	4.32	51968.9
0.433	4.33	51740.8
0.434	4.34	51812.9
0.435	4.35	52150.3
0.436	4.36	52154.4
0.437	4.37	51985
0.438	4.38	51980.8
0.439	4.39	52740.5
0.44	4.4	52209.5
0.441	4.41	52580.2
0.442	4.42	52554.2
0.443	4.43	52408.7
0.444	4.44	52395
0.445	4.45	53396.8
0.446	4.46	52997.4
0.447	4.47	53063.3
0.448	4.48	52514.9
0.449	4.49	52918.4
0.45	4.5	52888.3
0.451	4.51	52518.6
0.452	4.52	52007.1
0.453	4.53	52068.6
0.454	4.54	51714.1
0.455	4.55	51955.1
0.456	4.56	52041
0.457	4.57	51914.1
0.458	4.58	51803.6
0.459	4.59	51220.9
0.46	4.6	50921.5
0.461	4.61	50384.5
0.462	4.62	50034.1
0.463	4.63	49725.9
0.464	4.64	49734.8
0.465	4.65	49708.5
0.466	4.66	49573.4
0.467	4.67	49742
0.468	4.68	49498.9
0.469	4.69	49245.6
0.47	4.7	49776.5
0.471	4.71	50294.9
0.472	4.72	50325.7
0.473	4.73	49835.4
0.474	4.74	49324.7
0.475	4.75	49345.5
0.476	4.76	48893.8
0.477	4.77	49201.9
0.478	4.78	49454
0.479	4.79	49589.5
0.48	4.8	49762.4
0.481	4.81	49249.3
0.482	4.82	49279.4
0.483	4.83	49775.3
0.484	4.84	50135.5
0.485	4.85	49898.8
0.486	4.86	49952.5
0.487	4.87	50728.9
0.488	4.88	49938.3
0.489	4.89	50451.8
0.49	4.9	49448.7
0.491	4.91	49707.7
0.492	4.92	50249.7
0.493	4.93	49939.3
0.494	4.94	50212.8
0.495	4.95	51983.7
0.496	4.96	50786.1
0.497	4.97	50805.9
0.498	4.98	50643.8
0.499	4.99	50297.2
0.5	5	50232.4
0.501	5.01	50774.5
0.502	5.02	50674.3
0.503	5.03	50360.7
0.504	5.04	51050.4
0.505	5.05	51080.7
0.506	5.06	51044.1
0.507	5.07	51113.9
0.508	5.08	51518.3
0.509	5.09	52003.4
0.51	5.1	52625.1
0.511	5.11	52061.6
0.512	5.12	52375.8
0.513	5.13	52091.5
0.514	5.14	52433.9
0.515	5.15	52333
0.516	5.16	52626.4
0.517	5.17	53364.9
0.518	5.18	53543.7
0.519	5.19	53022.5
0.52	5.2	52476
0.521	5.21	52745.8
0.522	5.22	52218.8
0.523	5.23	52242.5
0.524	5.24	52071.5
0.525	5.25	53197.1
0.526	5.26	52727.6
0.527	5.27	52880.6
0.528	5.28	53729.8
0.529	5.29	53301.3
0.53	5.3	53936.2
0.531	5.31	54158.6
0.532	5.32	54133.7
0.533	5.33	53359.2
0.534	5.34	52964.5
0.535	5.35	53106.8
0.536	5.36	52663.4
0.537	5.37	52388.7
0.538	5.38	52596.8
0.539	5.39	53349
0.54	5.4	53868.3
0.541	5.41	53800.3
0.542	5.42	53791.2
0.543	5.43	53237
0.544	5.44	52751.6
0.545	5.45	52553.7
0.546	5.46	51662.6
0.547	5.47	51254.8
0.548	5.48	50729.7
0.549	5.49	50541.3
0.55	5.5	49591.7
0.551	5.51	49468.5
0.552	5.52	49797
0.553	5.53	50377.6
0.554	5.54	50675.1
0.555	5.55	50893.6
0.556	5.56	50798.3
0.557	5.57	50778.9
0.558	5.58	49507.3
0.559	5.59	49109.5
0.56	5.6	49594.9
0.561	5.61	49162.1
0.562	5.62	48801.9
0.563	5.63	47746.1
0.564	5.64	47719.3
0.565	5.65	48542.8
0.566	5.66	48758.3
0.567	5.67	49126.4
0.568	5.68	49552.2
0.569	5.69	49730.5
0.57	5.7	49395
0.571	5.71	49056.1
0.572	5.72	48948.9
0.573	5.73	48421.8
0.574	5.74	47843.2
0.575	5.75	48186.9
0.576	5.76	47884.2
0.577	5.77	48311.8
0.578	5.78	48025
0.579	5.79	48879.1
0.58	5.8	49594.3
0.581	5.81	49966.9
0.582	5.82	50638.6
0.583	5.83	50513.1
0.584	5.84	50220.1
0.585	5.85	50671.9
0.586	5.86	49803
0.587	5.87	49693.1
0.588	5.88	50011.1
0.589	5.89	49560.1
0.59	5.9	50399.5
0.591	5.91	50582.9
0.592	5.92	50062.5
0.593	5.93	49926.7
0.594	5.94	49003.6
0.595	5.95	50001.2
0.596	5.96	50736.4
0.597	5.97	50730.2
0.598	5.98	51132.3
0.599	5.99	51292
0.6	6	51333.1
0.601	6.01	51267
0.602	6.02	51060.4
0.603	6.03	51103
0.604	6.04	51440.6
0.605	6.05	51278.5
0.606	6.06	51021.9
0.607	6.07	51220.4
0.608	6.08	51134.9
0.609	6.09	51293.7
0.61	6.1	50779
0.611	6.11	50008.4
0.612	6.12	50321.8
0.613	6.13	49760.1
0.614	6.14	50107.4
0.615	6.15	49509.1
0.616	6.16	49010.5
0.617	6.17	49821.2
0.618	6.18	50500.8
0.619	6.19	50288.9
0.62	6.2	50116.3
0.621	6.21	50252.5
0.622	6.22	50610.6
0.623	6.23	50346.8
0.624	6.24	50888.8
0.625	6.25	50981.3
0.626	6.26	51156.9
0.627	6.27	50959.2
0.628	6.28	50844.8
0.629	6.29	50538.7
0.63	6.3	50905
0.631	6.31	51666
0.632	6.32	51934.7
0.633	6.33	51267.3
0.634	6.34	50996.8
0.635	6.35	51305.7
0.636	6.36	50656.4
0.637	6.37	50702.7
0.638	6.38	51159.5
0.639	6.39	51067.2
0.64	6.4	50798.4
0.641	6.41	50155.2
0.642	6.42	50597.9
0.643	6.43	50826.8
0.644	6.44	50581.5
0.645	6.45	50153.8
0.646	6.46	49662.2
0.647	6.47	49098.1
0.648	6.48	47848.8
0.649	6.49	48235.9
0.65	6.5	47550
0.651	6.51	47464
0.652	6.52	47468
0.653	6.53	47573.5
0.654	6.54	47904.5
0.655	6.55	47294.7
0.656	6.56	46825.1
0.657	6.57	46136.9
0.658	6.58	46001.3
0.659	6.59	47144.3
0.66	6.6	47234.6
0.661	6.61	46625.5
0.662	6.62	47085.7
0.663	6.63	46806.6
0.664	6.64	45399.2
0.665	6.65	46561.8
0.666	6.66	46908.3
0.667	6.67	45934.3
0.668	6.68	46195.2
0.669	6.69	47275
0.67	6.7	48296.8
0.671	6.71	49332
0.672	6.72	49245.7
0.673	6.73	50131.6
0.674	6.74	49974
0.675	6.75	49614.6
0.676	6.76	48842.1
0.677	6.77	49363.1
0.678	6.78	48624.3
0.679	6.79	48712.1
0.68	6.8	48962.9
0.681	6.81	49041.7
0.682	6.82	49398
0.683	6.83	48675.7
0.684	6.84	48418
0.685	6.85	47913.2
0.686	6.86	49209.4
0.687	6.87	48608.7
0.688	6.88	48269
0.689	6.89	48377.7
0.69	6.9	49033.8
0.691	6.91	49124
0.692	6.92	48687.2
0.693	6.93	49571.7
0.694	6.94	50064.1
0.695	6.95	50247.3
0.696	6.96	50051.1
0.697	6.97	50306.8
0.698	6.98	49842.5
0.699	6.99	49793.9
0.7	7	49013.8
0.701	7.01	49121.9
0.702	7.02	49519.4
0.703	7.03	49921.9
0.704	7.04	50325.3
0.705	7.05	50542.2
0.706	7.06	50250.9
0.707	7.07	50150.3
0.708	7.08	49781.3
0.709	7.09	49527.4
0.71	7.1	48928.5
0.711	7.11	50013.7
0.712	7.12	50432.6
0.713	7.13	50320.9
0.714	7.14	50770.4
0.715	7.15	50176.8
0.716	7.16	50381.6
0.717	7.17	50678.1
0.718	7.18	50965.8
0.719	7.19	50223.5
0.72	7.2	50524.4
0.721	7.21	50351.8
0.722	7.22	50492.1
0.723	7.23	49788.1
0.724	7.24	49282
0.725	7.25	49240
0.726	7.26	48727.2
0.727	7.27	48746.5
0.728	7.28	49485
0.729	7.29	49078.6
0.73	7.3	48206.7
0.731	7.31	48655.7
0.732	7.32	49454.1
0.733	7.33	49189.3
0.734	7.34	48591.4
0.735	7.35	48314.1
0.736	7.36	48113.9
0.737	7.37	47496.3
0.738	7.38	46982.7
0.739	7.39	47718.4
0.74	7.4	46706.7
0.741	7.41	46531.9
0.742	7.42	46215.6
0.743	7.43	45784.8
0.744	7.44	45877
0.745	7.45	45599.5
0.746	7.46	44891.4
0.747	7.47	45456.5
0.748	7.48	45068.6
0.749	7.49	44423.1
0.75	7.5	45048.7
0.751	7.51	44273.7
0.752	7.52	44431
0.753	7.53	44284.7
0.754	7.54	43527.4
0.755	7.55	43107.8
0.756	7.56	43502.1
0.757	7.57	44243.1
0.758	7.58	44273.9
0.759	7.59	44894.3
0.76	7.6	44809.2
0.761	7.61	44836.6
0.762	7.62	44249.1
0.763	7.63	44280.2
0.764	7.64	44424.4
0.765	7.65	44650.8
0.766	7.66	45596.1
0.767	7.67	46328.6
0.768	7.68	46409.4
0.769	7.69	46807.3
0.77	7.7	46263
0.771	7.71	45758.5
0.772	7.72	47059.3
0.773	7.73	47097.3
0.774	7.74	46947.9
0.775	7.75	47082.9
0.776	7.76	47127.4
0.777	7.77	46995.6
0.778	7.78	46402.4
0.779	7.79	47311.4
0.78	7.8	47637.1
0.781	7.81	47912.2
0.782	7.82	47660.6
0.783	7.83	46574.9
0.784	7.84	46854.9
0.785	7.85	46884
0.786	7.86	46801.6
0.787	7.87	47774.8
0.788	7.88	47759.2
0.789	7.89	48267.5
0.79	7.9	48338.6
0.791	7.91	48863.3
0.792	7.92	49002.7
0.793	7.93	49500.1
0.794	7.94	48741.5
0.795	7.95	48637.7
0.796	7.96	49310.3
0.797	7.97	49364.8
0.798	7.98	49536.6
0.799	7.99	49368.4
0.8	8	48752.4
0.801	8.01	48977.1
0.802	8.02	48091
0.803	8.03	48787.7
0.804	8.04	48452.1
0.805	8.05	48398.6
0.806	8.06	48134.4
0.807	8.07	48799.3
0.808	8.08	48728.1
0.809	8.09	48565.5
0.81	8.1	48699.5
0.811	8.11	49393
0.812	8.12	49724.1
0.813	8.13	50083.9
0.814	8.14	49807.5
0.815	8.15	49539.9
0.816	8.16	49091.8
0.817	8.17	48469.3
0.818	8.18	48077.1
0.819	8.19	47969
0.82	8.2	47587.2
0.821	8.21	48101.1
0.822	8.22	48223.8
0.823	8.23	48261.1
0.824	8.24	48082.2
0.825	8.25	47009.1
0.826	8.26	46516.7
0.827	8.27	46158.8
0.828	8.28	45041.4
0.829	8.29	44126.1
0.83	8.3	44372.6
0.831	8.31	44226.6
0.832	8.32	43884.7
0.833	8.33	43852.8
0.834	8.34	42745.8
0.835	8.35	43687.3
0.836	8.36	44206.5
0.837	8.37	43899.4
0.838	8.38	43860.4
0.839	8.39	43808.3
0.84	8.4	43129.4
0.841	8.41	42285.3
0.842	8.42	42314.2
0.843	8.43	41733.1
0.844	8.44	41711.3
0.845	8.45	40588.3
0.846	8.46	41211.2
0.847	8.47	41447.1
0.848	8.48	41757.2
0.849	8.49	41729.7
0.85	8.5	42353.3
0.851	8.51	42671.7
0.852	8.52	42304.1
0.853	8.53	42735.5
0.854	8.54	42367.1
0.855	8.55	42809.6
0.856	8.56	43467.8
0.857	8.57	43906
0.858	8.58	44349.2
0.859	8.59	44122.3
0.86	8.6	43774.1
0.861	8.61	45169.8
0.862	8.62	44949.6
0.863	8.63	45304.2
0.864	8.64	45600.4
0.865	8.65	45134
0.866	8.66	45797.1
0.867	8.67	46186.4
0.868	8.68	46874.8
0.869	8.69	46924.7
0.87	8.7	46972.5
0.871	8.71	47599.6
0.872	8.72	47904.2
0.873	8.73	48168.7
0.874	8.74	48509.7
0.875	8.75	49934.6
0.876	8.76	50169.3
0.877	8.77	50827
0.878	8.78	50358.2
0.879	8.79	50547.2
0.88	8.8	50124.5
0.881	8.81	50546.7
0.882	8.82	51074.9
0.883	8.83	51187.7
0.884	8.84	50185.1
0.885	8.85	50080.4
0.886	8.86	49332.6
0.887	8.87	50185.4
0.888	8.88	49055.5
0.889	8.89	49385.3
0.89	8.9	50173.7
0.891	8.91	49326.5
0.892	8.92	49304.1
0.893	8.93	48768
0.894	8.94	48494.9
0.895	8.95	47890.6
0.896	8.96	47217.6
0.897	8.97	48042.4
0.898	8.98	47402.1
0.899	8.99	46823.5
0.9	9	46378.5
0.901	9.01	45770.4
0.902	9.02	45575.3
0.903	9.03	45641.6
0.904	9.04	45932.3
0.905	9.05	46089.3
0.906	9.06	45772.4
0.907	9.07	46286.8
0.908	9.08	46829.4
0.909	9.09	45787.2
0.91	9.1	45388.4
0.911	9.11	45191.8
0.912	9.12	45081.2
0.913	9.13	46011.7
0.914	9.14	45872.5
0.915	9.15	46260.7
0.916	9.16	46562.5
0.917	9.17	47065.5
0.918	9.18	47163.9
0.919	9.19	47424
0.92	9.2	47471.6
0.921	9.21	46961.3
0.922	9.22	47758.8
0.923	9.23	48011.2
0.924	9.24	47233.7
0.925	9.25	47477.8
0.926	9.26	47364.4
0.927	9.27	47416
0.928	9.28	47240.6
0.929	9.29	47486.8
0.93	9.3	47536.8
0.931	9.31	48995.7
0.932	9.32	48669.6
0.933	9.33	48860.1
0.934	9.34	47953.6
0.935	9.35	48450.2
0.936	9.36	48787.9
0.937	9.37	48275
0.938	9.38	48536.4
0.939	9.39	48730.8
0.94	9.4	48532.6
0.941	9.41	48775.1
0.942	9.42	48927
0.943	9.43	48906.4
0.944	9.44	48834.5
0.945	9.45	48744.8
0.946	9.46	48816.8
0.947	9.47	49549.5
0.948	9.48	49040.3
0.949	9.49	49035.3
0.95	9.5	48958.7
0.951	9.51	49777.9
0.952	9.52	50016.1
0.953	9.53	50450.1
0.954	9.54	50530.4
0.955	9.55	50214.6
0.956	9.56	50071.6
0.957	9.57	50752.5
0.958	9.58	49856.7
0.959	9.59	51237.1
0.96	9.6	51748.7
0.961	9.61	51493.8
0.962	9.62	50935
0.963	9.63	51642.3
0.964	9.64	50732.2
0.965	9.65	50299.4
0.966	9.66	51022.5
0.967	9.67	51406.3
0.968	9.68	51803.6
0.969	9.69	51139.7
0.97	9.7	51203.2
0.971	9.71	50752.7
0.972	9.72	51228.8
0.973	9.73	50379.7
0.974	9.74	50904.6
0.975	9.75	50586
0.976	9.76	50731.6
0.977	9.77	50538
0.978	9.78	50065
0.979	9.79	49937.5
0.98	9.8	50867
0.981	9.81	50841.5
0.982	9.82	50100.3
0.983	9.83	50384.7
0.984	9.84	50243.6
0.985	9.85	50345.2
0.986	9.86	50853.4
0.987	9.87	50741.6
0.988	9.88	50502.1
0.989	9.89	50189.9
0.99	9.9	49776.5
0.991	9.91	49780.7
0.992	9.92	49985.2
0.993	9.93	49131.6
0.994	9.94	48726.1
0.995	9.95	48231.3
0.996	9.96	48508.1
0.997	9.97	48405.5
0.998	9.98	49840.1
0.999	9.99	50051.8
1	10	50119.8
