# Supplementary material for: Investigating the Pavement Vibration Response for Roadway Service Condition Evaluation
Source: Hindawi journal article supplement (doi:10.1155/2018/2714657), 2018-01-01
Supplement: f1 [file 2714657.f1.zip › data/Figure8.xlsx]

## Sheet: L33
measured data										simulated data
middle			lower							point B				point C
0.00510034	1.99226		0.000731457	2.03859						0	0	中面层		0	0		下面层
0.0196666	5.01958		0.00655664	1.97681						3.97789e-07	0			3.97789e-07	0
0.0335014	4.87285		0.0160226	1.87641						7.95578e-07	0			7.95578e-07	0
0.0524382	9.44473		0.0240322	1.79146						1.19337e-06	0			1.19337e-06	0
0.061176	9.35206		0.0349544	1.67562						1.6906e-06	0			1.6906e-06	0
0.0743041	29.8946		0.042964	1.59067						2.31215e-06	0			2.31215e-06	0
0.0771737	-11.4994		0.0517034	3.08889						3.08908e-06	0			3.08908e-06	0
0.0785208	-116.514		0.0575286	3.02711						4.06024e-06	0			4.06024e-06	0
0.0800399	-56.0753		0.0633554	4.55622						5.2742e-06	0			5.2742e-06	0
0.0820175	-254.96		0.0713667	6.06216						6.79164e-06	0			6.79164e-06	0
0.0820854	-189.733		0.0742793	6.03127						8.68845e-06	0			8.68845e-06	0
0.0848772	-305.899		0.0771737	-11.4994						1.10595e-05	0			1.10595e-05	0
0.0870004	-364.785		0.0786151	-25.8329						1.40232e-05	0			1.40232e-05	0
0.0883359	-480.936		0.0800449	-51.3026						1.77279e-05	0			1.77279e-05	0
0.089759	-512.769		0.082931	-76.7878						2.23588e-05	4.44089e-16			2.23588e-05	2.22045e-16
0.0898418	-433.225		0.0843625	-100.667						2.81474e-05	5.55112e-15			2.81474e-05	2.66454e-15
0.0911707	-555.739		0.0872486	-126.152						3.53831e-05	9.10383e-15			3.53831e-05	-6.88338e-15
0.0940435	-593.951		0.0894082	-150.038						4.44278e-05	1.69642e-13			4.44278e-05	-2.19824e-14
0.0984439	-563.77		0.0937523	-173.948						5.57336e-05	1.06491e-12			5.57336e-05	-1.11926e-14
0.0999399	-525.605		0.0973963	-170.805						6.98659e-05	5.22267e-12			6.98659e-05	3.3163e-13
0.101451	-473.121		0.0981394	-156.495						8.75313e-05	2.0465e-11			8.75313e-05	2.71195e-12
0.10297	-412.682		0.0996139	-139.01						0.000109613	6.51086e-11			0.000109613	1.28175e-11
0.103764	-349.054		0.10181	-127.897						0.000137215	1.70522e-10			0.000137215	4.44531e-11
0.107456	-299.775		0.103283	-112.004						0.000171718	3.69628e-10			0.000171718	1.21941e-10
0.11188	-247.322		0.105482	-97.7088						0.000214846	6.58e-10			0.000214846	2.75968e-10
0.122127	-196.522		0.108408	-85.0125						0.000268757	9.20366e-10			0.000268757	5.29413e-10
0.133092	-155.274		0.112792	-70.7408						0.000336145	8.28986e-10			0.000336145	8.73644e-10
0.152798	-110.938		0.119362	-54.9014						0.00042038	-2.73307e-10			0.00042038	1.23289e-09
0.173216	-82.5181		0.125192	-50.1905						0.000525674	-3.49056e-09			0.000525674	1.41349e-09
0.199453	-60.5236		0.133213	-39.1392						0.000657291	-1.04676e-08			0.000657291	1.04695e-09
0.237336	-41.8345		0.141227	-34.4515						0.000821812	-2.342e-08			0.000821812	-4.49464e-10
0.258459	-35.6949		0.149244	-28.1729						0.00102746	-4.50443e-08			0.00102746	-3.87749e-09
0.291232	-29.6788		0.158713	-25.0915						0.00128453	-7.82255e-08			0.00128453	-1.0227e-08
0.30143	-26.6052		0.170368	-20.4424						0.00160586	-1.25386e-07			0.00160586	-2.05777e-08
			0.182748	-18.9828						0.00200752	-1.87273e-07			0.00200752	-3.58292e-08
			0.195127	-19.1141						0.0025096	-2.61161e-07			0.0025096	-5.61718e-08
			0.209695	-14.4959						0.0031372	-3.38472e-07			0.0031372	-8.02877e-08
			0.216978	-12.9822						0.0039217	-4.01751e-07			0.0039217	-1.042e-07
			0.226446	-11.4917						0.00490233	-4.22053e-07			0.00490233	-1.19993e-07
			0.232999	-11.5612						0.00590233	-3.76123e-07			0.00590233	-1.17905e-07
			0.241007	-13.2371						0.00690233	-2.67827e-07			0.00690233	-9.74263e-08
			0.24756	-13.3066						0.00790233	-1.03347e-07			0.00790233	-5.96355e-08
			0.257026	-13.407						0.00890233	1.10434e-07			0.00890233	-6.06902e-09
			0.265037	-11.901						0.00990233	3.65518e-07			0.00990233	6.13603e-08
			0.273777	-10.4028						0.0109023	6.51212e-07			0.0109023	1.40019e-07
			0.281058	-10.48						0.0119023	9.5305e-07			0.0119023	2.26108e-07
			0.289068	-10.565						0.0129023	1.25754e-06			0.0129023	3.15369e-07
			0.298534	-10.6654						0.0139023	1.55748e-06			0.0139023	4.04795e-07
			0.302903	-10.7117						0.0149023	1.84785e-06			0.0149023	4.92541e-07
										0.0159023	2.12036e-06			0.0159023	5.76263e-07
										0.0169023	2.3667e-06			0.0169023	6.53239e-07
										0.0179023	2.58338e-06			0.0179023	7.2177e-07
										0.0189023	2.77073e-06			0.0189023	7.81339e-07
										0.0199023	2.92989e-06			0.0199023	8.31834e-07
										0.0209023	3.06186e-06			0.0209023	8.73362e-07
										0.0219023	3.16778e-06			0.0219023	9.06395e-07
										0.0229023	3.24892e-06			0.0229023	9.31456e-07
										0.0239023	3.30679e-06			0.0239023	9.48893e-07
										0.0249023	3.3432e-06			0.0249023	9.59236e-07
										0.0259023	3.35972e-06			0.0259023	9.63403e-07
										0.0269023	3.35854e-06			0.0269023	9.62216e-07
										0.0279023	3.34422e-06			0.0279023	9.56489e-07
										0.0289023	3.32134e-06			0.0289023	9.4755e-07
										0.0299023	3.2924e-06			0.0299023	9.36747e-07
										0.0309023	3.26103e-06			0.0309023	9.25108e-07
										0.0319023	3.23137e-06			0.0319023	9.13538e-07
										0.0329023	3.20473e-06			0.0329023	9.02686e-07
										0.0339023	3.18075e-06			0.0339023	8.93085e-07
										0.0349023	3.15946e-06			0.0349023	8.85099e-07
										0.0359023	3.1411e-06			0.0359023	8.78498e-07
										0.0369023	3.12697e-06			0.0369023	8.73061e-07
										0.0379023	3.11979e-06			0.0379023	8.69587e-07
										0.0389023	3.12135e-06			0.0389023	8.68984e-07
										0.0399023	3.13055e-06			0.0399023	8.71003e-07
										0.0409023	3.14377e-06			0.0409023	8.74954e-07
										0.0419023	3.15971e-06			0.0419023	8.80697e-07
										0.0429023	3.18291e-06			0.0429023	8.88791e-07
										0.0439023	3.21761e-06			0.0439023	8.99717e-07
										0.0449023	3.26334e-06			0.0449023	9.13401e-07
										0.0459023	3.31944e-06			0.0459023	9.30269e-07
										0.0469023	3.38668e-06			0.0469023	9.51165e-07
										0.0479023	3.46374e-06			0.0479023	9.75565e-07
										0.0489023	3.5493e-06			0.0489023	1.00205e-06
										0.0499023	3.64654e-06			0.0499023	1.03094e-06
										0.0509023	3.75766e-06			0.0509023	1.06363e-06
										0.0519023	3.87613e-06			0.0519023	1.09937e-06
										0.0529023	3.99261e-06			0.0529023	1.13547e-06
										0.0539023	4.10651e-06			0.0539023	1.17101e-06
										0.0549023	4.22196e-06			0.0549023	1.20733e-06
										0.0559023	4.33602e-06			0.0559023	1.2441e-06
										0.0569023	4.44262e-06			0.0569023	1.27907e-06
										0.0579023	4.54405e-06			0.0579023	1.31239e-06
										0.0589023	4.64809e-06			0.0589023	1.34592e-06
										0.0599023	4.75424e-06			0.0599023	1.37943e-06
										0.0609023	4.85346e-06			0.0609023	1.41099e-06
										0.0619023	4.94459e-06			0.0619023	1.44032e-06
										0.0629023	5.03555e-06			0.0629023	1.46924e-06
										0.0639023	5.12572e-06			0.0639023	1.49793e-06
										0.0649023	5.20671e-06			0.0649023	1.52392e-06
										0.0659023	5.28073e-06			0.0659023	1.5472e-06
										0.0669023	5.35808e-06			0.0669023	1.57094e-06
										0.0679023	5.43807e-06			0.0679023	1.595e-06
										0.0689023	5.5106e-06			0.0689023	1.61615e-06
										0.0699023	5.57598e-06			0.0699023	1.63544e-06
										0.0709023	5.6466e-06			0.0709023	1.65702e-06
										0.0719023	5.72624e-06			0.0719023	1.68025e-06
										0.0729023	5.80576e-06			0.0729023	1.70168e-06
										0.0739023	5.88477e-06			0.0739023	1.72272e-06
										0.0749023	5.97634e-06			0.0749023	1.74775e-06
										0.0759023	6.08173e-06			0.0759023	1.77609e-06
										0.0769023	6.18656e-06			0.0769023	1.80286e-06
										0.0779023	6.28943e-06			0.0779023	1.82861e-06
										0.0789023	6.40414e-06			0.0789023	1.85761e-06
										0.0799023	6.52833e-06			0.0799023	1.88875e-06
										0.0809023	6.64338e-06			0.0809023	1.91756e-06
										0.0819023	6.75071e-06			0.0819023	1.94421e-06
										0.0829023	6.87112e-06			0.0829023	1.97343e-06
										0.0839023	7.00302e-06			0.0839023	2.00484e-06
										0.0849023	7.12458e-06			0.0849023	2.03335e-06
										0.0859023	7.23936e-06			0.0859023	2.06007e-06
										0.0869023	7.3771e-06			0.0869023	2.09262e-06
										0.0879023	7.54121e-06			0.0879023	2.1302e-06
										0.0889023	7.69947e-06			0.0889023	2.16173e-06
										0.0899023	7.84138e-06			0.0899023	2.18738e-06
										0.0909023	7.9937e-06			0.0909023	2.21809e-06
										0.0919023	8.16449e-06			0.0919023	2.25261e-06
										0.0929023	8.32959e-06			0.0929023	2.28093e-06
										0.0939023	8.49039e-06			0.0939023	2.30502e-06
										0.0949023	8.68401e-06			0.0949023	2.33603e-06
										0.0959023	8.91481e-06			0.0959023	2.37226e-06
										0.0969023	9.14505e-06			0.0969023	2.40133e-06
										0.0979023	9.37028e-06			0.0979023	2.42367e-06
										0.0989023	9.62866e-06			0.0989023	2.45053e-06
										0.0999023	9.91976e-06			0.0999023	2.47883e-06
										0.100902	1.01956e-05			0.100902	2.49292e-06
										0.101902	1.04535e-05			0.101902	2.49371e-06
										0.102902	1.07414e-05			0.102902	2.49396e-06
										0.103902	1.10576e-05			0.103902	2.4888e-06
										0.104902	1.1356e-05			0.104902	2.46255e-06
										0.105902	1.16479e-05			0.105902	2.41598e-06
										0.106902	1.19903e-05			0.106902	2.36203e-06
										0.107902	1.23695e-05			0.107902	2.29495e-06
										0.108902	1.27167e-05			0.108902	2.19389e-06
										0.109902	1.30251e-05			0.109902	2.05742e-06
										0.110902	1.33491e-05			0.110902	1.90105e-06
										0.111902	1.36953e-05			0.111902	1.71626e-06
										0.112902	1.40214e-05			0.112902	1.47285e-06
										0.113902	1.43428e-05			0.113902	1.16617e-06
										0.114902	1.47317e-05			0.114902	8.12326e-07
										0.115902	1.51857e-05			0.115902	3.97402e-07
										0.116902	1.56233e-05			0.116902	-1.15148e-07
										0.117902	1.60271e-05			0.117902	-7.29139e-07
										0.118902	1.64692e-05			0.118902	-1.43555e-06
										0.119902	1.69539e-05			0.119902	-2.26705e-06
										0.120902	1.73764e-05			0.120902	-3.26602e-06
										0.121902	1.76879e-05			0.121902	-4.43196e-06
										0.122902	1.7932e-05			0.122902	-5.75547e-06
										0.123902	1.81122e-05			0.123902	-7.28627e-06
										0.124902	1.81511e-05			0.124902	-9.12914e-06
										0.125902	1.79789e-05			0.125902	-1.1352e-05
										0.126902	1.75852e-05			0.126902	-1.39817e-05
										0.127902	1.69207e-05			0.127902	-1.70749e-05
										0.128902	1.57879e-05			0.128902	-2.06953e-05
										0.129902	1.39071e-05			0.129902	-2.48892e-05
										0.130902	1.10737e-05			0.130902	-2.97026e-05
										0.131902	7.14832e-06			0.131902	-3.5183e-05
										0.132902	1.75723e-06			0.132902	-4.14227e-05
										0.133902	-5.9363e-06			0.133902	-4.86092e-05
										0.134902	-1.6777e-05			0.134902	-5.69007e-05
										0.135902	-3.09648e-05			0.135902	-6.60805e-05
										0.136902	-4.85805e-05			0.136902	-7.58088e-05
										0.137902	-7.03623e-05			0.137902	-8.60432e-05
										0.138902	-9.71314e-05			0.138902	-9.6861e-05
										0.139902	-0.000128814			0.139902	-0.000108062
										0.140902	-0.000165545			0.140902	-0.000119703
										0.141902	-0.000207246			0.141902	-0.0001318
										0.142902	-0.000252822			0.142902	-0.000143962
										0.143902	-0.000300693			0.143902	-0.000155855
										0.144902	-0.00034769			0.144902	-0.000166641
										0.145902	-0.000391522			0.145902	-0.000175923
										0.146902	-0.000431502			0.146902	-0.000184091
										0.147902	-0.000465387			0.147902	-0.000190908
										0.148902	-0.000491194			0.148902	-0.000196074
										0.149902	-0.000508301			0.149902	-0.000199624
										0.150902	-0.000516118			0.150902	-0.000201503
										0.151902	-0.000514218			0.151902	-0.000201696
										0.152902	-0.000502852			0.152902	-0.000200368
										0.153902	-0.000481981			0.153902	-0.000197346
										0.154902	-0.000451063			0.154902	-0.000191929
										0.155902	-0.000411348			0.155902	-0.000183949
										0.156902	-0.000366533			0.156902	-0.000174357
										0.157902	-0.000319717			0.157902	-0.000163877
										0.158902	-0.000272602			0.158902	-0.000152542
										0.159902	-0.000227141			0.159902	-0.000140695
										0.160902	-0.000184785			0.160902	-0.000128625
										0.161902	-0.000146557			0.161902	-0.000116525
										0.162902	-0.000113224			0.162902	-0.000104768
										0.163902	-8.46773e-05			0.163902	-9.34571e-05
										0.164902	-6.06285e-05			0.164902	-8.27412e-05
										0.165902	-4.0921e-05			0.165902	-7.27893e-05
										0.166902	-2.51996e-05			0.166902	-6.3509e-05
										0.167902	-1.29831e-05			0.167902	-5.49585e-05
										0.168902	-3.6831e-06			0.168902	-4.72724e-05
										0.169902	3.37885e-06			0.169902	-4.0382e-05
										0.170902	8.71607e-06			0.170902	-3.42209e-05
										0.171902	1.2541e-05			0.171902	-2.87999e-05
										0.172902	1.50644e-05			0.172902	-2.40728e-05
										0.173902	1.67329e-05			0.173902	-1.99665e-05
										0.174902	1.78917e-05			0.174902	-1.64176e-05
										0.175902	1.85308e-05			0.175902	-1.3388e-05
										0.176902	1.86321e-05			0.176902	-1.08259e-05
										0.177902	1.8479e-05			0.177902	-8.6467e-06
										0.178902	1.83189e-05			0.178902	-6.79792e-06
										0.179902	1.80532e-05			0.179902	-5.26099e-06
										0.180902	1.75722e-05			0.180902	-3.9935e-06
										0.181902	1.70328e-05			0.181902	-2.91159e-06
										0.182902	1.65572e-05			0.182902	-1.96148e-06
										0.183902	1.60384e-05			0.183902	-1.16262e-06
										0.184902	1.54149e-05			0.184902	-5.28664e-07
										0.185902	1.48128e-05			0.185902	-4.57367e-09
										0.186902	1.43058e-05			0.186902	4.58017e-07
										0.187902	1.37994e-05			0.187902	8.40072e-07
										0.188902	1.32457e-05			0.188902	1.12678e-06
										0.189902	1.27454e-05			0.189902	1.35904e-06
										0.190902	1.23485e-05			0.190902	1.56945e-06
										0.191902	1.19545e-05			0.191902	1.73875e-06
										0.192902	1.15063e-05			0.192902	1.85424e-06
										0.193902	1.10901e-05			0.193902	1.94517e-06
										0.194902	1.07595e-05			0.194902	2.03103e-06
										0.195902	1.04442e-05			0.195902	2.09448e-06
										0.196902	1.01023e-05			0.196902	2.12647e-06
										0.197902	9.79194e-06			0.197902	2.1485e-06
										0.198902	9.54384e-06			0.198902	2.17509e-06
										0.199902	9.30707e-06			0.199902	2.19229e-06
										0.200902	9.05658e-06			0.200902	2.19057e-06
										0.201902	8.83955e-06			0.201902	2.18694e-06
										0.202902	8.67034e-06			0.202902	2.19026e-06
										0.203902	8.49671e-06			0.203902	2.18661e-06
										0.204902	8.30346e-06			0.204902	2.17118e-06
										0.205902	8.13721e-06			0.205902	2.15688e-06
										0.206902	8.01102e-06			0.206902	2.14939e-06
										0.207902	7.88083e-06			0.207902	2.13767e-06
										0.208902	7.73102e-06			0.208902	2.11608e-06
										0.209902	7.5956e-06			0.209902	2.09475e-06
										0.210902	7.4827e-06			0.210902	2.07855e-06
										0.211902	7.3583e-06			0.211902	2.05809e-06
										0.212902	7.21493e-06			0.212902	2.02957e-06
										0.213902	7.08531e-06			0.213902	2.00294e-06
										0.214902	6.97829e-06			0.214902	1.98186e-06
										0.215902	6.86653e-06			0.215902	1.95807e-06
										0.216902	6.74376e-06			0.216902	1.92919e-06
										0.217902	6.63492e-06			0.217902	1.90287e-06
										0.218902	6.54565e-06			0.218902	1.88232e-06
										0.219902	6.45375e-06			0.219902	1.86043e-06
										0.220902	6.35445e-06			0.220902	1.83379e-06
										0.221902	6.26524e-06			0.221902	1.8086e-06
										0.222902	6.18498e-06			0.222902	1.78663e-06
										0.223902	6.0931e-06			0.223902	1.76196e-06
										0.224902	5.98859e-06			0.224902	1.73369e-06
										0.225902	5.89166e-06			0.225902	1.70705e-06
										0.226902	5.80647e-06			0.226902	1.68266e-06
										0.227902	5.71624e-06			0.227902	1.65655e-06
										0.228902	5.61748e-06			0.228902	1.62854e-06
										0.229902	5.52586e-06			0.229902	1.60248e-06
										0.230902	5.44542e-06			0.230902	1.57911e-06
										0.231902	5.36352e-06			0.231902	1.55488e-06
										0.232902	5.27779e-06			0.232902	1.52905e-06
										0.233902	5.19874e-06			0.233902	1.50501e-06
										0.234902	5.12632e-06			0.234902	1.48321e-06
										0.235902	5.04963e-06			0.235902	1.46026e-06
										0.236902	4.96786e-06			0.236902	1.43576e-06
										0.237902	4.89047e-06			0.237902	1.41271e-06
										0.238902	4.81899e-06			0.238902	1.39094e-06
										0.239902	4.74521e-06			0.239902	1.36763e-06
										0.240902	4.66559e-06			0.240902	1.34278e-06
										0.241902	4.58373e-06			0.241902	1.31862e-06
										0.242902	4.49947e-06			0.242902	1.29517e-06
										0.243902	4.40993e-06			0.243902	1.2703e-06
										0.244902	4.32012e-06			0.244902	1.24438e-06
										0.245902	4.23911e-06			0.245902	1.22e-06
										0.246902	4.16714e-06			0.246902	1.19754e-06
										0.247902	4.09655e-06			0.247902	1.17526e-06
										0.248902	4.02407e-06			0.248902	1.15266e-06
										0.249902	3.95196e-06			0.249902	1.13079e-06
										0.250902	3.8787e-06			0.250902	1.10939e-06
										0.251902	3.80034e-06			0.251902	1.08682e-06
										0.252902	3.71943e-06			0.252902	1.0631e-06
										0.253902	3.64179e-06			0.253902	1.03992e-06
										0.254902	3.56687e-06			0.254902	1.01763e-06
										0.255902	3.49045e-06			0.255902	9.94892e-07
										0.256902	3.41315e-06			0.256902	9.71595e-07
										0.257902	3.33607e-06			0.257902	9.4897e-07
										0.258902	3.25624e-06			0.258902	9.26457e-07
										0.259902	3.17374e-06			0.259902	9.02716e-07
										0.260902	3.09188e-06			0.260902	8.7867e-07
										0.261902	3.01037e-06			0.261902	8.55479e-07
										0.262902	2.92778e-06			0.262902	8.32445e-07
										0.263902	2.84621e-06			0.263902	8.0905e-07
										0.264902	2.7707e-06			0.264902	7.86361e-07
										0.265902	2.70578e-06			0.265902	7.65868e-07
										0.266902	2.65099e-06			0.266902	7.47949e-07
										0.267902	2.60199e-06			0.267902	7.31805e-07
										0.268902	2.55545e-06			0.268902	7.16866e-07
										0.269902	2.50902e-06			0.269902	7.0282e-07
										0.270902	2.46104e-06			0.270902	6.88809e-07
										0.271902	2.41114e-06			0.271902	6.74309e-07
										0.272902	2.35881e-06			0.272902	6.59431e-07
										0.273902	2.30429e-06			0.273902	6.44212e-07
										0.274902	2.24886e-06			0.274902	6.28613e-07
										0.275902	2.19422e-06			0.275902	6.12749e-07
										0.276902	2.14318e-06			0.276902	5.97319e-07
										0.277902	2.09654e-06			0.277902	5.83061e-07
										0.278902	2.05033e-06			0.278902	5.69471e-07
										0.279902	2.00021e-06			0.279902	5.55274e-07
										0.280902	1.94649e-06			0.280902	5.40047e-07
										0.281902	1.89169e-06			0.281902	5.24334e-07
										0.282902	1.8362e-06			0.282902	5.08349e-07
										0.283902	1.78019e-06			0.283902	4.9199e-07
										0.284902	1.72505e-06			0.284902	4.75632e-07
										0.285902	1.67159e-06			0.285902	4.59679e-07
										0.286902	1.61904e-06			0.286902	4.44062e-07
										0.287902	1.56587e-06			0.287902	4.28389e-07
										0.288902	1.5136e-06			0.288902	4.12688e-07
										0.289902	1.46725e-06			0.289902	3.98051e-07
										0.290902	1.42843e-06			0.290902	3.85408e-07
										0.291902	1.39425e-06			0.291902	3.74366e-07
										0.292902	1.36411e-06			0.292902	3.64551e-07
										0.293902	1.3401e-06			0.293902	3.56451e-07
										0.294902	1.32344e-06			0.294902	3.50478e-07
										0.295902	1.31517e-06			0.295902	3.46901e-07
										0.296902	1.31508e-06			0.296902	3.4595e-07
										0.297902	1.3205e-06			0.297902	3.47181e-07
										0.298902	1.32882e-06			0.298902	3.49793e-07
										0.299902	1.33853e-06			0.299902	3.53221e-07
										0.3	1.33952e-06			0.3	3.53587e-07

## Sheet: L22
measured data										simulated data
middle			lower							point B				point C
0.00287847	3.30328		0.014259	1.10055						0	0	0		0	0	0
0.0128548	3.31557		0.0377817	1.86843						3.97789e-07	0	0		3.97789e-07	0	0
0.0285425	4.44326		0.0670052	2.64334						7.95578e-07	0	0		7.95578e-07	0	0
0.0442161	4.09311		0.0933854	4.15366						1.19337e-06	0	0		1.19337e-06	0	0
0.0648955	5.59641		0.109217	20.4293						1.6906e-06	0	0		1.6906e-06	0	0
0.0855819	7.83863		0.114363	37.0613						2.31215e-06	0	0		2.31215e-06	0	0
0.0984789	15.2437		0.122293	46.6769						3.08908e-06	0	0		3.08908e-06	0	0
0.102856	25.9634		0.131395	29.6931						4.06024e-06	0	0		4.06024e-06	0	0
0.106542	38.8989		0.139799	14.1862						5.2742e-06	0	0		5.2742e-06	0	0
0.108827	54.419		0.15324	3.85791						6.79164e-06	0	0		6.79164e-06	0	0
0.111084	66.9833		0.17598	-2.76433						8.68845e-06	0	0		8.68845e-06	0	0
0.113335	78.8088		0.191671	-1.26717						1.10595e-05	0	0		1.10595e-05	0	0
0.114145	89.1546		0.213765	-0.870504						1.40232e-05	0	0		1.40232e-05	0	0
0.119952	100.245		0.230158	-0.480857						1.77279e-05	0	0		1.77279e-05	0	0
0.124269	104.684		0.262229	-0.0719033						2.23588e-05	2.22045e-16	2.22045e-10		2.23588e-05	2.22045e-16	2.22045e-10
0.128429	92.4973		0.297862	0.341438						2.81474e-05	4.21885e-15	4.21885e-09		2.81474e-05	3.77476e-15	3.77476e-09
0.131185	82.5253									3.53831e-05	-6.10623e-15	-6.10623e-09		3.53831e-05	2.22045e-15	2.22045e-09
0.133905	68.8587									4.44278e-05	4.4853e-14	4.4853e-08		4.44278e-05	3.81917e-14	3.81917e-08
0.137321	53.3457									5.57336e-05	2.86649e-13	2.86649e-07		5.57336e-05	2.82893e-13	2.82893e-07
0.145029	39.6852									6.98659e-05	1.45617e-12	1.45617e-06		6.98659e-05	1.45108e-12	1.45108e-06
0.15133	27.8703									8.75313e-05	6.06109e-12	6.06109e-06		8.75313e-05	6.11505e-12	6.11505e-06
0.15978	17.1665									0.000109613	2.10323e-11	2.10323e-05		0.000109613	2.14927e-11	2.14927e-05
0.172543	10.5319									0.000137215	6.21776e-11	6.21776e-05		0.000137215	6.45546e-11	6.45546e-05
0.190299	4.27301									0.000171718	1.58719e-10	0.000158719		0.000171718	1.68322e-10	0.000168322
0.207387	2.81622									0.000214846	3.53781e-10	0.000353781		0.000214846	3.86316e-10	0.000386316
0.220207	2.09309									0.000268757	6.91812e-10	0.000691812		0.000268757	7.8855e-10	0.00078855
0.23587	0.634551									0.000336145	1.18091e-09	0.00118091		0.000336145	1.44066e-09	0.00144066
0.259382	0.294049									0.00042038	1.71413e-09	0.00171413		0.00042038	2.35597e-09	0.00235597
0.296437	0.339683									0.000525674	1.93291e-09	0.00193291		0.000525674	3.40993e-09	0.00340993
										0.000657291	1.01462e-09	0.00101462		0.000657291	4.20557e-09	0.00420557
										0.000821812	-2.63831e-09	-0.00263831		0.000821812	3.87551e-09	0.00387551
										0.00102746	-1.18408e-08	-0.0118408		0.00102746	7.97787e-10	0.000797787
										0.00128453	-3.12415e-08	-0.0312415		0.00128453	-7.80826e-09	-0.00780826
										0.00160586	-6.81331e-08	-0.0681331		0.00160586	-2.64321e-08	-0.0264321
										0.00200752	-1.33414e-07	-0.133414		0.00200752	-6.19484e-08	-0.0619484
										0.0025096	-2.42618e-07	-0.242618		0.0025096	-1.24369e-07	-0.124369
										0.0031372	-4.16786e-07	-0.416786		0.0031372	-2.27552e-07	-0.227552
										0.0039217	-6.82486e-07	-0.682486		0.0039217	-3.89364e-07	-0.389364
										0.00490233	-1.07037e-06	-1.07037		0.00490233	-6.30806e-07	-0.630806
										0.00590233	-1.50953e-06	-1.50953		0.00590233	-9.08707e-07	-0.908707
										0.00690233	-1.97457e-06	-1.97457		0.00690233	-1.20664e-06	-1.20664
										0.00790233	-2.45026e-06	-2.45026		0.00790233	-1.51456e-06	-1.51456
										0.00890233	-2.92328e-06	-2.92328		0.00890233	-1.82363e-06	-1.82363
										0.00990233	-3.38213e-06	-3.38213		0.00990233	-2.12604e-06	-2.12604
										0.0109023	-3.81775e-06	-3.81775		0.0109023	-2.41531e-06	-2.41531
										0.0119023	-4.22529e-06	-4.22529		0.0119023	-2.68735e-06	-2.68735
										0.0129023	-4.60378e-06	-4.60378		0.0129023	-2.9409e-06	-2.9409
										0.0139023	-4.95182e-06	-4.95182		0.0139023	-3.17499e-06	-3.17499
										0.0149023	-5.26571e-06	-5.26571		0.0149023	-3.38698e-06	-3.38698
										0.0159023	-5.54286e-06	-5.54286		0.0159023	-3.57463e-06	-3.57463
										0.0169023	-5.78383e-06	-5.78383		0.0169023	-3.73775e-06	-3.73775
										0.0179023	-5.99022e-06	-5.99022		0.0179023	-3.87718e-06	-3.87718
										0.0189023	-6.16273e-06	-6.16273		0.0189023	-3.99338e-06	-3.99338
										0.0199023	-6.3008e-06	-6.3008		0.0199023	-4.08612e-06	-4.08612
										0.0209023	-6.40316e-06	-6.40316		0.0209023	-4.15467e-06	-4.15467
										0.0219023	-6.46928e-06	-6.46928		0.0219023	-4.19858e-06	-4.19858
										0.0229023	-6.50039e-06	-6.50039		0.0229023	-4.21855e-06	-4.21855
										0.0239023	-6.49889e-06	-6.49889		0.0239023	-4.21617e-06	-4.21617
										0.0249023	-6.46738e-06	-6.46738		0.0249023	-4.19319e-06	-4.19319
										0.0259023	-6.41014e-06	-6.41014		0.0259023	-4.15209e-06	-4.15209
										0.0269023	-6.33426e-06	-6.33426		0.0269023	-4.09729e-06	-4.09729
										0.0279023	-6.24613e-06	-6.24613		0.0279023	-4.03338e-06	-4.03338
										0.0289023	-6.14913e-06	-6.14913		0.0289023	-3.96288e-06	-3.96288
										0.0299023	-6.04704e-06	-6.04704		0.0299023	-3.88811e-06	-3.88811
										0.0309023	-5.94462e-06	-5.94462		0.0309023	-3.8124e-06	-3.8124
										0.0319023	-5.84384e-06	-5.84384		0.0319023	-3.7376e-06	-3.7376
										0.0329023	-5.74428e-06	-5.74428		0.0329023	-3.66372e-06	-3.66372
										0.0339023	-5.64699e-06	-5.64699		0.0339023	-3.5912e-06	-3.5912
										0.0349023	-5.55611e-06	-5.55611		0.0349023	-3.52237e-06	-3.52237
										0.0359023	-5.47673e-06	-5.47673		0.0359023	-3.46053e-06	-3.46053
										0.0369023	-5.41142e-06	-5.41142		0.0369023	-3.40782e-06	-3.40782
										0.0379023	-5.3598e-06	-5.3598		0.0379023	-3.36431e-06	-3.36431
										0.0389023	-5.32115e-06	-5.32115		0.0389023	-3.32957e-06	-3.32957
										0.0399023	-5.29539e-06	-5.29539		0.0399023	-3.30355e-06	-3.30355
										0.0409023	-5.28416e-06	-5.28416		0.0409023	-3.28684e-06	-3.28684
										0.0419023	-5.29309e-06	-5.29309		0.0419023	-3.28235e-06	-3.28235
										0.0429023	-5.32792e-06	-5.32792		0.0429023	-3.29403e-06	-3.29403
										0.0439023	-5.38878e-06	-5.38878		0.0439023	-3.32277e-06	-3.32277
										0.0449023	-5.47168e-06	-5.47168		0.0449023	-3.36643e-06	-3.36643
										0.0459023	-5.57333e-06	-5.57333		0.0459023	-3.42272e-06	-3.42272
										0.0469023	-5.69382e-06	-5.69382		0.0469023	-3.49112e-06	-3.49112
										0.0479023	-5.83572e-06	-5.83572		0.0479023	-3.57295e-06	-3.57295
										0.0489023	-5.99904e-06	-5.99904		0.0489023	-3.66886e-06	-3.66886
										0.0499023	-6.17681e-06	-6.17681		0.0499023	-3.77555e-06	-3.77555
										0.0509023	-6.35836e-06	-6.35836		0.0509023	-3.88658e-06	-3.88658
										0.0519023	-6.53708e-06	-6.53708		0.0519023	-3.99693e-06	-3.99693
										0.0529023	-6.71228e-06	-6.71228		0.0529023	-4.10539e-06	-4.10539
										0.0539023	-6.88354e-06	-6.88354		0.0539023	-4.21184e-06	-4.21184
										0.0549023	-7.0482e-06	-7.0482		0.0549023	-4.31453e-06	-4.31453
										0.0559023	-7.20603e-06	-7.20603		0.0559023	-4.41251e-06	-4.41251
										0.0569023	-7.36001e-06	-7.36001		0.0569023	-4.50719e-06	-4.50719
										0.0579023	-7.51219e-06	-7.51219		0.0579023	-4.59988e-06	-4.59988
										0.0589023	-7.66071e-06	-7.66071		0.0589023	-4.69005e-06	-4.69005
										0.0599023	-7.79982e-06	-7.79982		0.0599023	-4.77457e-06	-4.77457
										0.0609023	-7.92566e-06	-7.92566		0.0609023	-4.85028e-06	-4.85028
										0.0619023	-8.03918e-06	-8.03918		0.0619023	-4.91718e-06	-4.91718
										0.0629023	-8.14029e-06	-8.14029		0.0629023	-4.97554e-06	-4.97554
										0.0639023	-8.22763e-06	-8.22763		0.0639023	-5.02425e-06	-5.02425
										0.0649023	-8.30331e-06	-8.30331		0.0649023	-5.06393e-06	-5.06393
										0.0659023	-8.36973e-06	-8.36973		0.0659023	-5.09634e-06	-5.09634
										0.0669023	-8.42633e-06	-8.42633		0.0669023	-5.12146e-06	-5.12146
										0.0679023	-8.47152e-06	-8.47152		0.0679023	-5.13849e-06	-5.13849
										0.0689023	-8.50379e-06	-8.50379		0.0689023	-5.14662e-06	-5.14662
										0.0699023	-8.52519e-06	-8.52519		0.0699023	-5.14598e-06	-5.14598
										0.0709023	-8.54428e-06	-8.54428		0.0709023	-5.14049e-06	-5.14049
										0.0719023	-8.56698e-06	-8.56698		0.0719023	-5.13508e-06	-5.13508
										0.0729023	-8.59005e-06	-8.59005		0.0729023	-5.12931e-06	-5.12931
										0.0739023	-8.61116e-06	-8.61116		0.0739023	-5.12087e-06	-5.12087
										0.0749023	-8.63434e-06	-8.63434		0.0749023	-5.11135e-06	-5.11135
										0.0759023	-8.66192e-06	-8.66192		0.0759023	-5.10308e-06	-5.10308
										0.0769023	-8.69062e-06	-8.69062		0.0769023	-5.09518e-06	-5.09518
										0.0779023	-8.71737e-06	-8.71737		0.0779023	-5.08541e-06	-5.08541
										0.0789023	-8.74123e-06	-8.74123		0.0789023	-5.07339e-06	-5.07339
										0.0799023	-8.75856e-06	-8.75856		0.0799023	-5.0578e-06	-5.0578
										0.0809023	-8.76912e-06	-8.76912		0.0809023	-5.03672e-06	-5.03672
										0.0819023	-8.78071e-06	-8.78071		0.0819023	-5.01345e-06	-5.01345
										0.0829023	-8.79608e-06	-8.79608		0.0829023	-4.99173e-06	-4.99173
										0.0839023	-8.80865e-06	-8.80865		0.0839023	-4.96919e-06	-4.96919
										0.0849023	-8.81709e-06	-8.81709		0.0849023	-4.94253e-06	-4.94253
										0.0859023	-8.83222e-06	-8.83222		0.0859023	-4.91528e-06	-4.91528
										0.0869023	-8.86525e-06	-8.86525		0.0869023	-4.89416e-06	-4.89416
										0.0879023	-8.9169e-06	-8.9169		0.0879023	-4.88237e-06	-4.88237
										0.0889023	-8.97307e-06	-8.97307		0.0889023	-4.87676e-06	-4.87676
										0.0899023	-9.01581e-06	-9.01581		0.0899023	-4.86648e-06	-4.86648
										0.0909023	-9.04727e-06	-9.04727		0.0909023	-4.84552e-06	-4.84552
										0.0919023	-9.08366e-06	-9.08366		0.0919023	-4.82129e-06	-4.82129
										0.0929023	-9.13035e-06	-9.13035		0.0929023	-4.79999e-06	-4.79999
										0.0939023	-9.18623e-06	-9.18623		0.0939023	-4.78016e-06	-4.78016
										0.0949023	-9.25638e-06	-9.25638		0.0949023	-4.76211e-06	-4.76211
										0.0959023	-9.34425e-06	-9.34425		0.0959023	-4.74954e-06	-4.74954
										0.0969023	-9.44357e-06	-9.44357		0.0969023	-4.74155e-06	-4.74155
										0.0979023	-9.54725e-06	-9.54725		0.0979023	-4.73286e-06	-4.73286
										0.0989023	-9.65382e-06	-9.65382		0.0989023	-4.72087e-06	-4.72087
										0.0999023	-9.7608e-06	-9.7608		0.0999023	-4.70559e-06	-4.70559
										0.100902	-9.86026e-06	-9.86026		0.100902	-4.68464e-06	-4.68464
										0.101902	-9.94635e-06	-9.94635		0.101902	-4.65144e-06	-4.65144
										0.102902	-1.00216e-05	-10.0216		0.102902	-4.60453e-06	-4.60453
										0.103902	-1.00853e-05	-10.0853		0.103902	-4.54736e-06	-4.54736
										0.104902	-1.01313e-05	-10.1313		0.104902	-4.47395e-06	-4.47395
										0.105902	-1.01648e-05	-10.1648		0.105902	-4.37835e-06	-4.37835
										0.106902	-1.01952e-05	-10.1952		0.106902	-4.26817e-06	-4.26817
										0.107902	-1.02145e-05	-10.2145		0.107902	-4.15059e-06	-4.15059
										0.108902	-1.0204e-05	-10.204		0.108902	-4.01656e-06	-4.01656
										0.109902	-1.0154e-05	-10.154		0.109902	-3.85696e-06	-3.85696
										0.110902	-1.00605e-05	-10.0605		0.110902	-3.67029e-06	-3.67029
										0.111902	-9.92e-06	-9.92		0.111902	-3.4504e-06	-3.4504
										0.112902	-9.73604e-06	-9.73604		0.112902	-3.18862e-06	-3.18862
										0.113902	-9.51698e-06	-9.51698		0.113902	-2.88509e-06	-2.88509
										0.114902	-9.26508e-06	-9.26508		0.114902	-2.54406e-06	-2.54406
										0.115902	-8.97746e-06	-8.97746		0.115902	-2.1675e-06	-2.1675
										0.116902	-8.64934e-06	-8.64934		0.116902	-1.75666e-06	-1.75666
										0.117902	-8.26865e-06	-8.26865		0.117902	-1.31086e-06	-1.31086
										0.118902	-7.81365e-06	-7.81365		0.118902	-8.1541e-07	-0.81541
										0.119902	-7.27451e-06	-7.27451		0.119902	-2.58037e-07	-0.258037
										0.120902	-6.65916e-06	-6.65916		0.120902	3.46789e-07	0.346789
										0.121902	-5.95645e-06	-5.95645		0.121902	9.87594e-07	0.987594
										0.122902	-5.13437e-06	-5.13437		0.122902	1.67583e-06	1.67583
										0.123902	-4.16363e-06	-4.16363		0.123902	2.43928e-06	2.43928
										0.124902	-3.02622e-06	-3.02622		0.124902	3.30526e-06	3.30526
										0.125902	-1.70433e-06	-1.70433		0.125902	4.27588e-06	4.27588
										0.126902	-1.55753e-07	-0.155753		0.126902	5.35377e-06	5.35377
										0.127902	1.67094e-06	1.67094		0.127902	6.5595e-06	6.5595
										0.128902	3.77705e-06	3.77705		0.128902	7.87842e-06	7.87842
										0.129902	6.17062e-06	6.17062		0.129902	9.27466e-06	9.27466
										0.130902	8.92565e-06	8.92565		0.130902	1.07527e-05	10.7527
										0.131902	1.21584e-05	12.1584		0.131902	1.23596e-05	12.3596
										0.132902	1.59385e-05	15.9385		0.132902	1.4123e-05	14.123
										0.133902	2.03099e-05	20.3099		0.133902	1.60313e-05	16.0313
										0.134902	2.5349e-05	25.349		0.134902	1.80802e-05	18.0802
										0.135902	3.1097e-05	31.097		0.135902	2.02421e-05	20.2421
										0.136902	3.75137e-05	37.5137		0.136902	2.2465e-05	22.465
										0.137902	4.44477e-05	44.4477		0.137902	2.46719e-05	24.6719
										0.138902	5.17272e-05	51.7272		0.138902	2.67965e-05	26.7965
										0.139902	5.95308e-05	59.5308		0.139902	2.89002e-05	28.9002
										0.140902	6.87163e-05	68.7163		0.140902	3.12972e-05	31.2972
										0.141902	7.99135e-05	79.9135		0.141902	3.42103e-05	34.2103
										0.142902	9.30262e-05	93.0262		0.142902	3.7596e-05	37.596
										0.143902	0.000107401	107.401		0.143902	4.12639e-05	41.2639
										0.144902	0.00012144	121.44		0.144902	4.47302e-05	44.7302
										0.145902	0.000134111	134.111		0.145902	4.77382e-05	47.7382
										0.146902	0.000145425	145.425		0.146902	5.04035e-05	50.4035
										0.147902	0.000154947	154.947		0.147902	5.26417e-05	52.6417
										0.148902	0.000162185	162.185		0.148902	5.4325e-05	54.325
										0.149902	0.000166962	166.962		0.149902	5.54408e-05	55.4408
										0.150902	0.000169072	169.072		0.150902	5.59472e-05	55.9472
										0.151902	0.000168457	168.457		0.151902	5.58329e-05	55.8329
										0.152902	0.000165369	165.369		0.152902	5.51954e-05	55.1954
										0.153902	0.000159738	159.738		0.153902	5.40028e-05	54.0028
										0.154902	0.00015087	150.87		0.154902	5.19573e-05	51.9573
										0.155902	0.000138761	138.761		0.155902	4.89755e-05	48.9755
										0.156902	0.000124944	124.944		0.156902	4.55405e-05	45.5405
										0.157902	0.000111027	111.027		0.157902	4.21412e-05	42.1412
										0.158902	9.78928e-05	97.8928		0.158902	3.89644e-05	38.9644
										0.159902	8.61918e-05	86.1918		0.159902	3.61502e-05	36.1502
										0.160902	7.57762e-05	75.7762		0.160902	3.35925e-05	33.5925
										0.161902	6.61113e-05	66.1113		0.161902	3.10749e-05	31.0749
										0.162902	5.7121e-05	57.121		0.162902	2.85991e-05	28.5991
										0.163902	4.88849e-05	48.8849		0.163902	2.62085e-05	26.2085
										0.164902	4.14808e-05	41.4808		0.164902	2.39369e-05	23.9369
										0.165902	3.48379e-05	34.8379		0.165902	2.17575e-05	21.7575
										0.166902	2.87794e-05	28.7794		0.166902	1.95843e-05	19.5843
										0.167902	2.33361e-05	23.3361		0.167902	1.74724e-05	17.4724
										0.168902	1.85842e-05	18.5842		0.168902	1.55082e-05	15.5082
										0.169902	1.44384e-05	14.4384		0.169902	1.36596e-05	13.6596
										0.170902	1.08111e-05	10.8111		0.170902	1.19058e-05	11.9058
										0.171902	7.65305e-06	7.65305		0.171902	1.02646e-05	10.2646
										0.172902	4.92397e-06	4.92397		0.172902	8.73792e-06	8.73792
										0.173902	2.60905e-06	2.60905		0.173902	7.34639e-06	7.34639
										0.174902	6.56598e-07	0.656598		0.174902	6.09475e-06	6.09475
										0.175902	-1.0087e-06	-1.0087		0.175902	4.95689e-06	4.95689
										0.176902	-2.42721e-06	-2.42721		0.176902	3.91299e-06	3.91299
										0.177902	-3.6042e-06	-3.6042		0.177902	2.98237e-06	2.98237
										0.178902	-4.56889e-06	-4.56889		0.178902	2.18445e-06	2.18445
										0.179902	-5.39038e-06	-5.39038		0.179902	1.47991e-06	1.47991
										0.180902	-6.10555e-06	-6.10555		0.180902	8.26663e-07	0.826663
										0.181902	-6.71279e-06	-6.71279		0.181902	2.22601e-07	0.222601
										0.182902	-7.2177e-06	-7.2177		0.182902	-3.29211e-07	-0.329211
										0.183902	-7.63101e-06	-7.63101		0.183902	-8.25528e-07	-0.825528
										0.184902	-7.96385e-06	-7.96385		0.184902	-1.25988e-06	-1.25988
										0.185902	-8.23492e-06	-8.23492		0.185902	-1.64661e-06	-1.64661
										0.186902	-8.45178e-06	-8.45178		0.186902	-1.99955e-06	-1.99955
										0.187902	-8.61448e-06	-8.61448		0.187902	-2.30969e-06	-2.30969
										0.188902	-8.73879e-06	-8.73879		0.188902	-2.57446e-06	-2.57446
										0.189902	-8.84394e-06	-8.84394		0.189902	-2.81032e-06	-2.81032
										0.190902	-8.93291e-06	-8.93291		0.190902	-3.02884e-06	-3.02884
										0.191902	-8.99985e-06	-8.99985		0.191902	-3.23053e-06	-3.23053
										0.192902	-9.03946e-06	-9.03946		0.192902	-3.41143e-06	-3.41143
										0.193902	-9.05287e-06	-9.05287		0.193902	-3.56564e-06	-3.56564
										0.194902	-9.05256e-06	-9.05256		0.194902	-3.69614e-06	-3.69614
										0.195902	-9.05033e-06	-9.05033		0.195902	-3.81338e-06	-3.81338
										0.196902	-9.04679e-06	-9.04679		0.196902	-3.92217e-06	-3.92217
										0.197902	-9.03621e-06	-9.03621		0.197902	-4.02178e-06	-4.02178
										0.198902	-9.0162e-06	-9.0162		0.198902	-4.10861e-06	-4.10861
										0.199902	-8.99701e-06	-8.99701		0.199902	-4.18348e-06	-4.18348
										0.200902	-8.98981e-06	-8.98981		0.200902	-4.25613e-06	-4.25613
										0.201902	-8.98913e-06	-8.98913		0.201902	-4.32971e-06	-4.32971
										0.202902	-8.9839e-06	-8.9839		0.202902	-4.3992e-06	-4.3992
										0.203902	-8.97074e-06	-8.97074		0.203902	-4.46056e-06	-4.46056
										0.204902	-8.95599e-06	-8.95599		0.204902	-4.5138e-06	-4.5138
										0.205902	-8.94694e-06	-8.94694		0.205902	-4.56466e-06	-4.56466
										0.206902	-8.93989e-06	-8.93989		0.206902	-4.61511e-06	-4.61511
										0.207902	-8.92927e-06	-8.92927		0.207902	-4.66129e-06	-4.66129
										0.208902	-8.91518e-06	-8.91518		0.208902	-4.70255e-06	-4.70255
										0.209902	-8.89401e-06	-8.89401		0.209902	-4.73888e-06	-4.73888
										0.210902	-8.85962e-06	-8.85962		0.210902	-4.76658e-06	-4.76658
										0.211902	-8.81387e-06	-8.81387		0.211902	-4.78421e-06	-4.78421
										0.212902	-8.76319e-06	-8.76319		0.212902	-4.79502e-06	-4.79502
										0.213902	-8.71069e-06	-8.71069		0.213902	-4.80156e-06	-4.80156
										0.214902	-8.65742e-06	-8.65742		0.214902	-4.80493e-06	-4.80493
										0.215902	-8.6045e-06	-8.6045		0.215902	-4.80595e-06	-4.80595
										0.216902	-8.55303e-06	-8.55303		0.216902	-4.80535e-06	-4.80535
										0.217902	-8.50246e-06	-8.50246		0.217902	-4.80353e-06	-4.80353
										0.218902	-8.45307e-06	-8.45307		0.218902	-4.80014e-06	-4.80014
										0.219902	-8.40862e-06	-8.40862		0.219902	-4.79706e-06	-4.79706
										0.220902	-8.3671e-06	-8.3671		0.220902	-4.79544e-06	-4.79544
										0.221902	-8.318e-06	-8.318		0.221902	-4.79046e-06	-4.79046
										0.222902	-8.25467e-06	-8.25467		0.222902	-4.77685e-06	-4.77685
										0.223902	-8.17999e-06	-8.17999		0.223902	-4.75453e-06	-4.75453
										0.224902	-8.10222e-06	-8.10222		0.224902	-4.72734e-06	-4.72734
										0.225902	-8.0277e-06	-8.0277		0.225902	-4.69993e-06	-4.69993
										0.226902	-7.95386e-06	-7.95386		0.226902	-4.67288e-06	-4.67288
										0.227902	-7.87548e-06	-7.87548		0.227902	-4.64275e-06	-4.64275
										0.228902	-7.79621e-06	-7.79621		0.228902	-4.60985e-06	-4.60985
										0.229902	-7.72295e-06	-7.72295		0.229902	-4.57868e-06	-4.57868
										0.230902	-7.65582e-06	-7.65582		0.230902	-4.55067e-06	-4.55067
										0.231902	-7.59187e-06	-7.59187		0.231902	-4.52425e-06	-4.52425
										0.232902	-7.52968e-06	-7.52968		0.232902	-4.49845e-06	-4.49845
										0.233902	-7.46789e-06	-7.46789		0.233902	-4.47266e-06	-4.47266
										0.234902	-7.40531e-06	-7.40531		0.234902	-4.44606e-06	-4.44606
										0.235902	-7.34215e-06	-7.34215		0.235902	-4.41856e-06	-4.41856
										0.236902	-7.2798e-06	-7.2798		0.236902	-4.39081e-06	-4.39081
										0.237902	-7.22014e-06	-7.22014		0.237902	-4.36393e-06	-4.36393
										0.238902	-7.1619e-06	-7.1619		0.238902	-4.3381e-06	-4.3381
										0.239902	-7.09836e-06	-7.09836		0.239902	-4.31004e-06	-4.31004
										0.240902	-7.02408e-06	-7.02408		0.240902	-4.27565e-06	-4.27565
										0.241902	-6.94185e-06	-6.94185		0.241902	-4.23519e-06	-4.23519
										0.242902	-6.86111e-06	-6.86111		0.242902	-4.19351e-06	-4.19351
										0.243902	-6.79122e-06	-6.79122		0.243902	-4.15667e-06	-4.15667
										0.244902	-6.73536e-06	-6.73536		0.244902	-4.1277e-06	-4.1277
										0.245902	-6.69016e-06	-6.69016		0.245902	-4.10556e-06	-4.10556
										0.246902	-6.64861e-06	-6.64861		0.246902	-4.08657e-06	-4.08657
										0.247902	-6.60394e-06	-6.60394		0.247902	-4.06642e-06	-4.06642
										0.248902	-6.55282e-06	-6.55282		0.248902	-4.04249e-06	-4.04249
										0.249902	-6.49523e-06	-6.49523		0.249902	-4.01432e-06	-4.01432
										0.250902	-6.43378e-06	-6.43378		0.250902	-3.98303e-06	-3.98303
										0.251902	-6.37256e-06	-6.37256		0.251902	-3.95102e-06	-3.95102
										0.252902	-6.31346e-06	-6.31346		0.252902	-3.91994e-06	-3.91994
										0.253902	-6.25467e-06	-6.25467		0.253902	-3.88914e-06	-3.88914
										0.254902	-6.19395e-06	-6.19395		0.254902	-3.8571e-06	-3.8571
										0.255902	-6.13044e-06	-6.13044		0.255902	-3.82324e-06	-3.82324
										0.256902	-6.06215e-06	-6.06215		0.256902	-3.78657e-06	-3.78657
										0.257902	-5.98831e-06	-5.98831		0.257902	-3.74598e-06	-3.74598
										0.258902	-5.91355e-06	-5.91355		0.258902	-3.7037e-06	-3.7037
										0.259902	-5.84134e-06	-5.84134		0.259902	-3.66261e-06	-3.66261
										0.260902	-5.77001e-06	-5.77001		0.260902	-3.62196e-06	-3.62196
										0.261902	-5.70132e-06	-5.70132		0.261902	-3.58194e-06	-3.58194
										0.262902	-5.64216e-06	-5.64216		0.262902	-3.5467e-06	-3.5467
										0.263902	-5.59638e-06	-5.59638		0.263902	-3.51936e-06	-3.51936
										0.264902	-5.5619e-06	-5.5619		0.264902	-3.49938e-06	-3.49938
										0.265902	-5.53287e-06	-5.53287		0.265902	-3.48363e-06	-3.48363
										0.266902	-5.50229e-06	-5.50229		0.266902	-3.46786e-06	-3.46786
										0.267902	-5.46474e-06	-5.46474		0.267902	-3.44841e-06	-3.44841
										0.268902	-5.41762e-06	-5.41762		0.268902	-3.42322e-06	-3.42322
										0.269902	-5.36186e-06	-5.36186		0.269902	-3.39231e-06	-3.39231
										0.270902	-5.30019e-06	-5.30019		0.270902	-3.35735e-06	-3.35735
										0.271902	-5.23399e-06	-5.23399		0.271902	-3.31929e-06	-3.31929
										0.272902	-5.16476e-06	-5.16476		0.272902	-3.2788e-06	-3.2788
										0.273902	-5.09572e-06	-5.09572		0.273902	-3.2378e-06	-3.2378
										0.274902	-5.02916e-06	-5.02916		0.274902	-3.19796e-06	-3.19796
										0.275902	-4.9646e-06	-4.9646		0.275902	-3.15937e-06	-3.15937
										0.276902	-4.89862e-06	-4.89862		0.276902	-3.12025e-06	-3.12025
										0.277902	-4.827e-06	-4.827		0.277902	-3.07781e-06	-3.07781
										0.278902	-4.74861e-06	-4.74861		0.278902	-3.03083e-06	-3.03083
										0.279902	-4.66617e-06	-4.66617		0.279902	-2.98066e-06	-2.98066
										0.280902	-4.58276e-06	-4.58276		0.280902	-2.92939e-06	-2.92939
										0.281902	-4.4997e-06	-4.4997		0.281902	-2.87798e-06	-2.87798
										0.282902	-4.41802e-06	-4.41802		0.282902	-2.82707e-06	-2.82707
										0.283902	-4.33885e-06	-4.33885		0.283902	-2.7775e-06	-2.7775
										0.284902	-4.26242e-06	-4.26242		0.284902	-2.72953e-06	-2.72953
										0.285902	-4.18889e-06	-4.18889		0.285902	-2.68324e-06	-2.68324
										0.286902	-4.11933e-06	-4.11933		0.286902	-2.6392e-06	-2.6392
										0.287902	-4.056e-06	-4.056		0.287902	-2.59874e-06	-2.59874
										0.288902	-4.00091e-06	-4.00091		0.288902	-2.56344e-06	-2.56344
										0.289902	-3.95266e-06	-3.95266		0.289902	-2.53292e-06	-2.53292
										0.290902	-3.90776e-06	-3.90776		0.290902	-2.50493e-06	-2.50493
										0.291902	-3.86481e-06	-3.86481		0.291902	-2.47835e-06	-2.47835
										0.292902	-3.82353e-06	-3.82353		0.292902	-2.45311e-06	-2.45311
										0.293902	-3.7819e-06	-3.7819		0.293902	-2.42809e-06	-2.42809
										0.294902	-3.73668e-06	-3.73668		0.294902	-2.40131e-06	-2.40131
										0.295902	-3.68349e-06	-3.68349		0.295902	-2.37014e-06	-2.37014
										0.296902	-3.61703e-06	-3.61703		0.296902	-2.33109e-06	-2.33109
										0.297902	-3.53311e-06	-3.53311		0.297902	-2.28122e-06	-2.28122
										0.298902	-3.42843e-06	-3.42843		0.298902	-2.21837e-06	-2.21837
										0.299902	-3.29907e-06	-3.29907		0.299902	-2.14e-06	-2.14
										0.3	-3.28498e-06	-3.28498		0.3	-2.13143e-06	-2.13143

## Sheet: L11
measured data										simulated data
middle			lower							point B				point C
0.00286249	-4.86828		0.00717201	-3.48937						0	0	0		0	0	0
0.00716204	-7.65601		0.0172181	-4.20707						3.97789e-07	0	0		3.97789e-07	0	0
0.0129036	-7.6693		0.0286831	-11.8725						7.95578e-07	0	0		7.95578e-07	0	0
0.0186353	-11.8492		0.0415817	-20.2357						1.19337e-06	0	0		1.19337e-06	0	0
0.0243519	-22.2791		0.0544804	-28.5989						1.6906e-06	0	0		1.6906e-06	0	0
0.0336422	-38.9673		0.0645497	-19.5944						2.31215e-06	0	0		2.31215e-06	0	0
0.0429241	-59.1277		0.0696318	4.69938						3.08908e-06	0	0		3.08908e-06	0	0
0.0514949	-76.5086		0.0718264	22.0554						4.06024e-06	0	0		4.06024e-06	0	0
0.0557862	-82.7686		0.0740227	40.1059						5.2742e-06	0	0		5.2742e-06	0	0
0.0608267	-75.8358		0.076219	58.1564						6.79164e-06	0	0		6.79164e-06	0	0
0.0615693	-65.4208		0.0812595	65.0891						8.68845e-06	0	0		8.68845e-06	0	0
0.0637556	-51.537		0.0862552	53.272						1.10595e-05	0	0		1.10595e-05	0	0
0.0659552	-32.0977		0.0912425	37.9827						1.40232e-05	0	0		1.40232e-05	0	0
0.0667244	-10.5717		0.0940768	22.6984						1.77279e-05	-1.11022e-16	-1.11022e-10		1.77279e-05	0	0
0.0682197	14.4249		0.100496	6.01682						2.23588e-05	-6.66134e-16	-6.66134e-10		2.23588e-05	-5.55112e-16	-5.55112e-10
0.0697497	54.0047		0.111948	-7.20413						2.81474e-05	-7.77156e-15	-7.77156e-09		2.81474e-05	-6.88338e-15	-6.88338e-09
0.071971	82.4717		0.12127	-10.6979						3.53831e-05	-1.15463e-13	-1.15463e-07		3.53831e-05	-9.90319e-14	-9.90319e-08
0.0734861	115.802		0.139931	-10.0467						4.44278e-05	-7.2653e-13	-7.2653e-07		4.44278e-05	-6.97997e-13	-6.97997e-07
0.07643	146.35		0.160751	-7.3171						5.57336e-05	-3.99201e-12	-3.99201e-06		5.57336e-05	-3.89114e-12	-3.89114e-06
0.0772075	171.349		0.183007	-4.59084						6.98659e-05	-1.75987e-11	-1.75987e-05		6.98659e-05	-1.74978e-11	-1.74978e-05
0.0801149	186.62		0.200236	-2.54739						8.75313e-05	-6.34212e-11	-6.34212e-05		8.75313e-05	-6.42991e-11	-6.42991e-05
0.0822547	181.059		0.215311	-1.1934						0.000109613	-1.90044e-10	-0.000190044		0.000109613	-1.97179e-10	-0.000197179
0.0829341	165.085		0.235407	-1.23991						0.000137215	-4.79743e-10	-0.000479743		0.000137215	-5.13525e-10	-0.000513525
0.0864927	152.577		0.259094	0.0941427						0.000171718	-1.02857e-09	-0.00102857		0.000171718	-1.15273e-09	-0.00115273
0.0892954	124.098		0.283496	0.0376571						0.000214846	-1.86963e-09	-0.00186963		0.000214846	-2.25358e-09	-0.00225358
0.0906644	96.3174		0.296415	0.00775293						0.000268757	-2.81527e-09	-0.00281527		0.000268757	-3.85343e-09	-0.00385343
0.0927543	69.9236									0.000336145	-3.21064e-09	-0.00321064		0.000336145	-5.72519e-09	-0.00572519
0.0962564	33.8044									0.00042038	-1.61198e-09	-0.00161198		0.00042038	-7.16313e-09	-0.00716313
0.099084	15.7423									0.000525674	4.58342e-09	0.00458342		0.000525674	-6.73454e-09	-0.00673454
0.104761	-11.3542									0.000657291	1.95187e-08	0.0195187		0.000657291	-2.02077e-09	-0.00202077
0.116203	-28.7418									0.000821812	4.92228e-08	0.0492228		0.000821812	1.06185e-08	0.0106185
0.124084	-34.3156									0.00102746	1.01852e-07	0.101852		0.00102746	3.62198e-08	0.0362198
0.133421	-31.5594									0.00128453	1.87681e-07	0.187681		0.00128453	8.12539e-08	0.0812539
0.154978	-20.4982									0.00160586	3.18551e-07	0.318551		0.00160586	1.53341e-07	0.153341
0.178686	-10.8308									0.00200752	5.06404e-07	0.506404		0.00200752	2.60359e-07	0.260359
0.197362	-3.92963									0.0025096	7.60842e-07	0.760842		0.0025096	4.08863e-07	0.408863
0.218903	0.187178									0.0031372	1.08543e-06	1.08543		0.0031372	6.01696e-07	0.601696
0.241155	1.52456									0.0039217	1.47207e-06	1.47207		0.0039217	8.34185e-07	0.834185
0.263407	2.86194									0.00490233	1.89526e-06	1.89526		0.00490233	1.09007e-06	1.09007
0.28709	2.11267									0.00590233	2.24153e-06	2.24153		0.00590233	1.29907e-06	1.29907
0.300726	2.08111									0.00690233	2.49483e-06	2.49483		0.00690233	1.45046e-06	1.45046
										0.00790233	2.65221e-06	2.65221		0.00790233	1.54207e-06	1.54207
										0.00890233	2.71358e-06	2.71358		0.00890233	1.57352e-06	1.57352
										0.00990233	2.68343e-06	2.68343		0.00990233	1.54734e-06	1.54734
										0.0109023	2.57388e-06	2.57388		0.0109023	1.47032e-06	1.47032
										0.0119023	2.40762e-06	2.40762		0.0119023	1.35543e-06	1.35543
										0.0129023	2.20881e-06	2.20881		0.0129023	1.21806e-06	1.21806
										0.0139023	1.98944e-06	1.98944		0.0139023	1.06715e-06	1.06715
										0.0149023	1.75538e-06	1.75538		0.0149023	9.06575e-07	0.906575
										0.0159023	1.51949e-06	1.51949		0.0159023	7.43558e-07	0.743558
										0.0169023	1.29727e-06	1.29727		0.0169023	5.87666e-07	0.587666
										0.0179023	1.09687e-06	1.09687		0.0179023	4.44783e-07	0.444783
										0.0189023	9.1867e-07	0.91867		0.0189023	3.16049e-07	0.316049
										0.0199023	7.59086e-07	0.759086		0.0199023	1.99777e-07	0.199777
										0.0209023	6.13682e-07	0.613682		0.0209023	9.32633e-08	0.0932633
										0.0219023	4.80206e-07	0.480206		0.0219023	-5.06229e-09	-0.00506229
										0.0229023	3.5885e-07	0.35885		0.0229023	-9.50053e-08	-0.0950053
										0.0239023	2.48751e-07	0.248751		0.0239023	-1.76857e-07	-0.176857
										0.0249023	1.47816e-07	0.147816		0.0249023	-2.52159e-07	-0.252159
										0.0259023	5.81509e-08	0.0581509		0.0259023	-3.20504e-07	-0.320504
										0.0269023	-1.54915e-08	-0.0154915		0.0269023	-3.78905e-07	-0.378905
										0.0279023	-7.62115e-08	-0.0762115		0.0279023	-4.28162e-07	-0.428162
										0.0289023	-1.31148e-07	-0.131148		0.0289023	-4.73132e-07	-0.473132
										0.0299023	-1.80307e-07	-0.180307		0.0299023	-5.14747e-07	-0.514747
										0.0309023	-2.23886e-07	-0.223886		0.0309023	-5.52284e-07	-0.552284
										0.0319023	-2.68761e-07	-0.268761		0.0319023	-5.89252e-07	-0.589252
										0.0329023	-3.19728e-07	-0.319728		0.0329023	-6.2937e-07	-0.62937
										0.0339023	-3.73887e-07	-0.373887		0.0339023	-6.71839e-07	-0.671839
										0.0349023	-4.24453e-07	-0.424453		0.0349023	-7.12801e-07	-0.712801
										0.0359023	-4.67467e-07	-0.467467		0.0359023	-7.49576e-07	-0.749576
										0.0369023	-5.05849e-07	-0.505849		0.0369023	-7.83406e-07	-0.783406
										0.0379023	-5.44804e-07	-0.544804		0.0379023	-8.17331e-07	-0.817331
										0.0389023	-5.85445e-07	-0.585445		0.0389023	-8.51943e-07	-0.851943
										0.0399023	-6.2629e-07	-0.62629		0.0399023	-8.8649e-07	-0.88649
										0.0409023	-6.6144e-07	-0.66144		0.0409023	-9.19279e-07	-0.919279
										0.0419023	-6.815e-07	-0.6815		0.0419023	-9.45465e-07	-0.945465
										0.0429023	-6.86521e-07	-0.686521		0.0429023	-9.63124e-07	-0.963124
										0.0439023	-6.8625e-07	-0.68625		0.0439023	-9.76915e-07	-0.976915
										0.0449023	-6.87863e-07	-0.687863		0.0449023	-9.91929e-07	-0.991929
										0.0459023	-6.92081e-07	-0.692081		0.0459023	-1.00937e-06	-1.00937
										0.0469023	-6.95069e-07	-0.695069		0.0469023	-1.02729e-06	-1.02729
										0.0479023	-6.92408e-07	-0.692408		0.0479023	-1.04335e-06	-1.04335
										0.0489023	-6.87733e-07	-0.687733		0.0489023	-1.0588e-06	-1.0588
										0.0499023	-6.94197e-07	-0.694197		0.0499023	-1.07941e-06	-1.07941
										0.0509023	-7.2061e-07	-0.72061		0.0509023	-1.10974e-06	-1.10974
										0.0519023	-7.60909e-07	-0.760909		0.0519023	-1.14826e-06	-1.14826
										0.0529023	-8.03879e-07	-0.803879		0.0529023	-1.19002e-06	-1.19002
										0.0539023	-8.48473e-07	-0.848473		0.0539023	-1.23287e-06	-1.23287
										0.0549023	-8.98246e-07	-0.898246		0.0549023	-1.27784e-06	-1.27784
										0.0559023	-9.48209e-07	-0.948209		0.0559023	-1.32372e-06	-1.32372
										0.0569023	-9.91776e-07	-0.991776		0.0569023	-1.36821e-06	-1.36821
										0.0579023	-1.03085e-06	-1.03085		0.0579023	-1.41175e-06	-1.41175
										0.0589023	-1.07401e-06	-1.07401		0.0589023	-1.45645e-06	-1.45645
										0.0599023	-1.12751e-06	-1.12751		0.0599023	-1.50561e-06	-1.50561
										0.0609023	-1.18679e-06	-1.18679		0.0609023	-1.56029e-06	-1.56029
										0.0619023	-1.24723e-06	-1.24723		0.0619023	-1.61789e-06	-1.61789
										0.0629023	-1.31407e-06	-1.31407		0.0629023	-1.6783e-06	-1.6783
										0.0639023	-1.38815e-06	-1.38815		0.0639023	-1.74332e-06	-1.74332
										0.0649023	-1.46279e-06	-1.46279		0.0649023	-1.81219e-06	-1.81219
										0.0659023	-1.53941e-06	-1.53941		0.0659023	-1.88449e-06	-1.88449
										0.0669023	-1.62548e-06	-1.62548		0.0669023	-1.96193e-06	-1.96193
										0.0679023	-1.7222e-06	-1.7222		0.0679023	-2.04524e-06	-2.04524
										0.0689023	-1.82616e-06	-1.82616		0.0689023	-2.13477e-06	-2.13477
										0.0699023	-1.93383e-06	-1.93383		0.0699023	-2.23101e-06	-2.23101
										0.0709023	-2.04364e-06	-2.04364		0.0709023	-2.33251e-06	-2.33251
										0.0719023	-2.15959e-06	-2.15959		0.0719023	-2.43857e-06	-2.43857
										0.0729023	-2.28605e-06	-2.28605		0.0729023	-2.55284e-06	-2.55284
										0.0739023	-2.42226e-06	-2.42226		0.0739023	-2.67752e-06	-2.67752
										0.0749023	-2.56898e-06	-2.56898		0.0749023	-2.8109e-06	-2.8109
										0.0759023	-2.72812e-06	-2.72812		0.0759023	-2.95221e-06	-2.95221
										0.0769023	-2.89765e-06	-2.89765		0.0769023	-3.10229e-06	-3.10229
										0.0779023	-3.07655e-06	-3.07655		0.0779023	-3.26172e-06	-3.26172
										0.0789023	-3.26859e-06	-3.26859		0.0789023	-3.42742e-06	-3.42742
										0.0799023	-3.47374e-06	-3.47374		0.0799023	-3.59764e-06	-3.59764
										0.0809023	-3.68052e-06	-3.68052		0.0809023	-3.77465e-06	-3.77465
										0.0819023	-3.88364e-06	-3.88364		0.0819023	-3.95711e-06	-3.95711
										0.0829023	-4.09437e-06	-4.09437		0.0829023	-4.1417e-06	-4.1417
										0.0839023	-4.3162e-06	-4.3162		0.0839023	-4.32819e-06	-4.32819
										0.0849023	-4.53663e-06	-4.53663		0.0849023	-4.5207e-06	-4.5207
										0.0859023	-4.75145e-06	-4.75145		0.0859023	-4.72191e-06	-4.72191
										0.0869023	-4.974e-06	-4.974		0.0869023	-4.93306e-06	-4.93306
										0.0879023	-5.21116e-06	-5.21116		0.0879023	-5.15275e-06	-5.15275
										0.0889023	-5.45553e-06	-5.45553		0.0889023	-5.37278e-06	-5.37278
										0.0899023	-5.70362e-06	-5.70362		0.0899023	-5.59282e-06	-5.59282
										0.0909023	-5.95855e-06	-5.95855		0.0909023	-5.82126e-06	-5.82126
										0.0919023	-6.21936e-06	-6.21936		0.0919023	-6.05886e-06	-6.05886
										0.0929023	-6.48123e-06	-6.48123		0.0929023	-6.30506e-06	-6.30506
										0.0939023	-6.7493e-06	-6.7493		0.0939023	-6.56614e-06	-6.56614
										0.0949023	-7.0406e-06	-7.0406		0.0949023	-6.84797e-06	-6.84797
										0.0959023	-7.35895e-06	-7.35895		0.0959023	-7.14799e-06	-7.14799
										0.0969023	-7.69189e-06	-7.69189		0.0969023	-7.46348e-06	-7.46348
										0.0979023	-8.04003e-06	-8.04003		0.0979023	-7.7973e-06	-7.7973
										0.0989023	-8.42015e-06	-8.42015		0.0989023	-8.1502e-06	-8.1502
										0.0999023	-8.83116e-06	-8.83116		0.0999023	-8.51651e-06	-8.51651
										0.100902	-9.25209e-06	-9.25209		0.100902	-8.8905e-06	-8.8905
										0.101902	-9.68582e-06	-9.68582		0.101902	-9.27969e-06	-9.27969
										0.102902	-1.01552e-05	-10.1552		0.102902	-9.68729e-06	-9.68729
										0.103902	-1.06561e-05	-10.6561		0.103902	-1.01008e-05	-10.1008
										0.104902	-1.11747e-05	-11.1747		0.104902	-1.05301e-05	-10.5301
										0.105902	-1.17316e-05	-11.7316		0.105902	-1.10007e-05	-11.0007
										0.106902	-1.23553e-05	-12.3553		0.106902	-1.15061e-05	-11.5061
										0.107902	-1.30273e-05	-13.0273		0.107902	-1.20135e-05	-12.0135
										0.108902	-1.37147e-05	-13.7147		0.108902	-1.25159e-05	-12.5159
										0.109902	-1.44188e-05	-14.4188		0.109902	-1.30163e-05	-13.0163
										0.110902	-1.51646e-05	-15.1646		0.110902	-1.35066e-05	-13.5066
										0.111902	-1.59641e-05	-15.9641		0.111902	-1.39955e-05	-13.9955
										0.112902	-1.6827e-05	-16.827		0.112902	-1.45159e-05	-14.5159
										0.113902	-1.77858e-05	-17.7858		0.113902	-1.50869e-05	-15.0869
										0.114902	-1.88877e-05	-18.8877		0.114902	-1.57043e-05	-15.7043
										0.115902	-2.01398e-05	-20.1398		0.115902	-1.63588e-05	-16.3588
										0.116902	-2.15076e-05	-21.5076		0.116902	-1.70379e-05	-17.0379
										0.117902	-2.2979e-05	-22.979		0.117902	-1.77193e-05	-17.7193
										0.118902	-2.46164e-05	-24.6164		0.118902	-1.84054e-05	-18.4054
										0.119902	-2.6468e-05	-26.468		0.119902	-1.91129e-05	-19.1129
										0.120902	-2.8473e-05	-28.473		0.120902	-1.98095e-05	-19.8095
										0.121902	-3.05651e-05	-30.5651		0.121902	-2.04353e-05	-20.4353
										0.122902	-3.27692e-05	-32.7692		0.122902	-2.09611e-05	-20.9611
										0.123902	-3.51816e-05	-35.1816		0.123902	-2.14237e-05	-21.4237
										0.124902	-3.78854e-05	-37.8854		0.124902	-2.18722e-05	-21.8722
										0.125902	-4.08678e-05	-40.8678		0.125902	-2.22678e-05	-22.2678
										0.126902	-4.41389e-05	-44.1389		0.126902	-2.25481e-05	-22.5481
										0.127902	-4.77977e-05	-47.7977		0.127902	-2.27216e-05	-22.7216
										0.128902	-5.17597e-05	-51.7597		0.128902	-2.27552e-05	-22.7552
										0.129902	-5.5717e-05	-55.717		0.129902	-2.25031e-05	-22.5031
										0.130902	-5.94991e-05	-59.4991		0.130902	-2.18509e-05	-21.8509
										0.131902	-6.32274e-05	-63.2274		0.131902	-2.08373e-05	-20.8373
										0.132902	-6.68148e-05	-66.8148		0.132902	-1.9499e-05	-19.499
										0.133902	-6.95956e-05	-69.5956		0.133902	-1.77025e-05	-17.7025
										0.134902	-7.08793e-05	-70.8793		0.134902	-1.52906e-05	-15.2906
										0.135902	-7.03987e-05	-70.3987		0.135902	-1.22789e-05	-12.2789
										0.136902	-6.78488e-05	-67.8488		0.136902	-8.75797e-06	-8.75797
										0.137902	-6.24347e-05	-62.4347		0.137902	-4.72787e-06	-4.72787
										0.138902	-5.33728e-05	-53.3728		0.138902	-1.50296e-07	-0.150296
										0.139902	-4.05076e-05	-40.5076		0.139902	4.91775e-06	4.91775
										0.140902	-2.40562e-05	-24.0562		0.140902	1.03831e-05	10.3831
										0.141902	-4.4025e-06	-4.4025		0.141902	1.60532e-05	16.0532
										0.142902	1.79329e-05	17.9329		0.142902	2.17217e-05	21.7217
										0.143902	4.23916e-05	42.3916		0.143902	2.73676e-05	27.3676
										0.144902	6.77409e-05	67.7409		0.144902	3.27794e-05	32.7794
										0.145902	9.22989e-05	92.2989		0.145902	3.75906e-05	37.5906
										0.146902	0.000114732	114.732		0.146902	4.16806e-05	41.6806
										0.147902	0.000133875	133.875		0.147902	4.50869e-05	45.0869
										0.148902	0.000148796	148.796		0.148902	4.78266e-05	47.8266
										0.149902	0.000158584	158.584		0.149902	4.9678e-05	49.678
										0.150902	0.000162478	162.478		0.150902	5.04107e-05	50.4107
										0.151902	0.00016049	160.49		0.151902	5.01748e-05	50.1748
										0.152902	0.000152969	152.969		0.152902	4.91975e-05	49.1975
										0.153902	0.000139798	139.798		0.153902	4.72951e-05	47.2951
										0.154902	0.000121087	121.087		0.154902	4.41431e-05	44.1431
										0.155902	9.8293e-05	98.293		0.155902	3.9882e-05	39.882
										0.156902	7.35151e-05	73.5151		0.156902	3.4992e-05	34.992
										0.157902	4.82519e-05	48.2519		0.157902	2.97055e-05	29.7055
										0.158902	2.35551e-05	23.5551		0.158902	2.40305e-05	24.0305
										0.159902	3.88841e-07	0.388841		0.159902	1.81061e-05	18.1061
										0.160902	-2.02778e-05	-20.2778		0.160902	1.21594e-05	12.1594
										0.161902	-3.74036e-05	-37.4036		0.161902	6.46499e-06	6.46499
										0.162902	-5.0598e-05	-50.598		0.162902	1.20765e-06	1.20765
										0.163902	-6.03829e-05	-60.3829		0.163902	-3.66828e-06	-3.66828
										0.164902	-6.74679e-05	-67.4679		0.164902	-8.20404e-06	-8.20404
										0.165902	-7.18534e-05	-71.8534		0.165902	-1.21921e-05	-12.1921
										0.166902	-7.33515e-05	-73.3515		0.166902	-1.54428e-05	-15.4428
										0.167902	-7.26813e-05	-72.6813		0.167902	-1.80885e-05	-18.0885
										0.168902	-7.08341e-05	-70.8341		0.168902	-2.03182e-05	-20.3182
										0.169902	-6.81346e-05	-68.1346		0.169902	-2.20514e-05	-22.0514
										0.170902	-6.46873e-05	-64.6873		0.170902	-2.32078e-05	-23.2078
										0.171902	-6.07631e-05	-60.7631		0.171902	-2.39076e-05	-23.9076
										0.172902	-5.66488e-05	-56.6488		0.172902	-2.42785e-05	-24.2785
										0.173902	-5.26e-05	-52.6		0.173902	-2.43574e-05	-24.3574
										0.174902	-4.87205e-05	-48.7205		0.174902	-2.41644e-05	-24.1644
										0.175902	-4.49811e-05	-44.9811		0.175902	-2.37628e-05	-23.7628
										0.176902	-4.1379e-05	-41.379		0.176902	-2.32039e-05	-23.2039
										0.177902	-3.80581e-05	-38.0581		0.177902	-2.25423e-05	-22.5423
										0.178902	-3.51418e-05	-35.1418		0.178902	-2.18575e-05	-21.8575
										0.179902	-3.25232e-05	-32.5232		0.179902	-2.11672e-05	-21.1672
										0.180902	-3.00716e-05	-30.0716		0.180902	-2.04395e-05	-20.4395
										0.181902	-2.78075e-05	-27.8075		0.181902	-1.96593e-05	-19.6593
										0.182902	-2.57448e-05	-25.7448		0.182902	-1.8829e-05	-18.829
										0.183902	-2.38307e-05	-23.8307		0.183902	-1.79821e-05	-17.9821
										0.184902	-2.20578e-05	-22.0578		0.184902	-1.71651e-05	-17.1651
										0.185902	-2.0454e-05	-20.454		0.185902	-1.63663e-05	-16.3663
										0.186902	-1.90075e-05	-19.0075		0.186902	-1.55613e-05	-15.5613
										0.187902	-1.76782e-05	-17.6782		0.187902	-1.47824e-05	-14.7824
										0.188902	-1.64557e-05	-16.4557		0.188902	-1.40642e-05	-14.0642
										0.189902	-1.53655e-05	-15.3655		0.189902	-1.33937e-05	-13.3937
										0.190902	-1.44028e-05	-14.4028		0.190902	-1.27494e-05	-12.7494
										0.191902	-1.35066e-05	-13.5066		0.191902	-1.21217e-05	-12.1217
										0.192902	-1.26437e-05	-12.6437		0.192902	-1.15082e-05	-11.5082
										0.193902	-1.18534e-05	-11.8534		0.193902	-1.09243e-05	-10.9243
										0.194902	-1.11594e-05	-11.1594		0.194902	-1.03849e-05	-10.3849
										0.195902	-1.05236e-05	-10.5236		0.195902	-9.88581e-06	-9.88581
										0.196902	-9.91918e-06	-9.91918		0.196902	-9.41555e-06	-9.41555
										0.197902	-9.36454e-06	-9.36454		0.197902	-8.96454e-06	-8.96454
										0.198902	-8.87158e-06	-8.87158		0.198902	-8.54035e-06	-8.54035
										0.199902	-8.4181e-06	-8.4181		0.199902	-8.15769e-06	-8.15769
										0.200902	-7.98802e-06	-7.98802		0.200902	-7.8069e-06	-7.8069
										0.201902	-7.59789e-06	-7.59789		0.201902	-7.47381e-06	-7.47381
										0.202902	-7.2515e-06	-7.2515		0.202902	-7.15508e-06	-7.15508
										0.203902	-6.92392e-06	-6.92392		0.203902	-6.85402e-06	-6.85402
										0.204902	-6.60581e-06	-6.60581		0.204902	-6.5766e-06	-6.5766
										0.205902	-6.3145e-06	-6.3145		0.205902	-6.31745e-06	-6.31745
										0.206902	-6.05662e-06	-6.05662		0.206902	-6.07065e-06	-6.07065
										0.207902	-5.81286e-06	-5.81286		0.207902	-5.83858e-06	-5.83858
										0.208902	-5.57342e-06	-5.57342		0.208902	-5.6187e-06	-5.6187
										0.209902	-5.35238e-06	-5.35238		0.209902	-5.4048e-06	-5.4048
										0.210902	-5.15331e-06	-5.15331		0.210902	-5.19787e-06	-5.19787
										0.211902	-4.95856e-06	-4.95856		0.211902	-5.00157e-06	-5.00157
										0.212902	-4.76238e-06	-4.76238		0.212902	-4.81478e-06	-4.81478
										0.213902	-4.57876e-06	-4.57876		0.213902	-4.63665e-06	-4.63665
										0.214902	-4.41177e-06	-4.41177		0.214902	-4.46772e-06	-4.46772
										0.215902	-4.24987e-06	-4.24987		0.215902	-4.30866e-06	-4.30866
										0.216902	-4.08972e-06	-4.08972		0.216902	-4.1587e-06	-4.1587
										0.217902	-3.94204e-06	-3.94204		0.217902	-4.016e-06	-4.016
										0.218902	-3.80818e-06	-3.80818		0.218902	-3.88231e-06	-3.88231
										0.219902	-3.67647e-06	-3.67647		0.219902	-3.7572e-06	-3.7572
										0.220902	-3.54885e-06	-3.54885		0.220902	-3.63724e-06	-3.63724
										0.221902	-3.43798e-06	-3.43798		0.221902	-3.52217e-06	-3.52217
										0.222902	-3.34096e-06	-3.34096		0.222902	-3.41248e-06	-3.41248
										0.223902	-3.24267e-06	-3.24267		0.223902	-3.30718e-06	-3.30718
										0.224902	-3.13713e-06	-3.13713		0.224902	-3.20517e-06	-3.20517
										0.225902	-3.03259e-06	-3.03259		0.225902	-3.10479e-06	-3.10479
										0.226902	-2.93768e-06	-2.93768		0.226902	-3.00674e-06	-3.00674
										0.227902	-2.8473e-06	-2.8473		0.227902	-2.91384e-06	-2.91384
										0.228902	-2.75202e-06	-2.75202		0.228902	-2.82455e-06	-2.82455
										0.229902	-2.65525e-06	-2.65525		0.229902	-2.73571e-06	-2.73571
										0.230902	-2.56365e-06	-2.56365		0.230902	-2.64875e-06	-2.64875
										0.231902	-2.4743e-06	-2.4743		0.231902	-2.56543e-06	-2.56543
										0.232902	-2.38553e-06	-2.38553		0.232902	-2.48491e-06	-2.48491
										0.233902	-2.30195e-06	-2.30195		0.233902	-2.40656e-06	-2.40656
										0.234902	-2.22325e-06	-2.22325		0.234902	-2.33036e-06	-2.33036
										0.235902	-2.14334e-06	-2.14334		0.235902	-2.25566e-06	-2.25566
										0.236902	-2.06009e-06	-2.06009		0.236902	-2.18157e-06	-2.18157
										0.237902	-1.97608e-06	-1.97608		0.237902	-2.10723e-06	-2.10723
										0.238902	-1.89583e-06	-1.89583		0.238902	-2.03303e-06	-2.03303
										0.239902	-1.82327e-06	-1.82327		0.239902	-1.96207e-06	-1.96207
										0.240902	-1.75619e-06	-1.75619		0.240902	-1.89504e-06	-1.89504
										0.241902	-1.68639e-06	-1.68639		0.241902	-1.82782e-06	-1.82782
										0.242902	-1.60356e-06	-1.60356		0.242902	-1.75569e-06	-1.75569
										0.243902	-1.50343e-06	-1.50343		0.243902	-1.67669e-06	-1.67669
										0.244902	-1.39379e-06	-1.39379		0.244902	-1.59344e-06	-1.59344
										0.245902	-1.28713e-06	-1.28713		0.245902	-1.51042e-06	-1.51042
										0.246902	-1.19112e-06	-1.19112		0.246902	-1.43156e-06	-1.43156
										0.247902	-1.10528e-06	-1.10528		0.247902	-1.35863e-06	-1.35863
										0.248902	-1.0257e-06	-1.0257		0.248902	-1.29006e-06	-1.29006
										0.249902	-9.49327e-07	-0.949327		0.249902	-1.22338e-06	-1.22338
										0.250902	-8.70623e-07	-0.870623		0.250902	-1.15613e-06	-1.15613
										0.251902	-7.84447e-07	-0.784447		0.251902	-1.08616e-06	-1.08616
										0.252902	-6.9416e-07	-0.69416		0.252902	-1.01419e-06	-1.01419
										0.253902	-6.07479e-07	-0.607479		0.253902	-9.4331e-07	-0.94331
										0.254902	-5.25575e-07	-0.525575		0.254902	-8.7506e-07	-0.87506
										0.255902	-4.46155e-07	-0.446155		0.255902	-8.08765e-07	-0.808765
										0.256902	-3.72301e-07	-0.372301		0.256902	-7.45532e-07	-0.745532
										0.257902	-3.01773e-07	-0.301773		0.257902	-6.85185e-07	-0.685185
										0.258902	-2.23958e-07	-0.223958		0.258902	-6.22204e-07	-0.622204
										0.259902	-1.40585e-07	-0.140585		0.259902	-5.559e-07	-0.5559
										0.260902	-5.97111e-08	-0.0597111		0.260902	-4.91424e-07	-0.491424
										0.261902	2.56559e-08	0.0256559		0.261902	-4.26423e-07	-0.426423
										0.262902	1.24986e-07	0.124986		0.262902	-3.54798e-07	-0.354798
										0.263902	2.33893e-07	0.233893		0.263902	-2.77987e-07	-0.277987
										0.264902	3.40389e-07	0.340389		0.264902	-2.02171e-07	-0.202171
										0.265902	4.32686e-07	0.432686		0.265902	-1.33456e-07	-0.133456
										0.266902	5.04523e-07	0.504523		0.266902	-7.60856e-08	-0.0760856
										0.267902	5.56743e-07	0.556743		0.267902	-3.05666e-08	-0.0305666
										0.268902	5.93972e-07	0.593972		0.268902	5.23999e-09	0.00523999
										0.269902	6.24308e-07	0.624308		0.269902	3.586e-08	0.03586
										0.270902	6.53201e-07	0.653201		0.270902	6.52074e-08	0.0652074
										0.271902	6.80302e-07	0.680302		0.271902	9.30056e-08	0.0930056
										0.272902	7.08547e-07	0.708547		0.272902	1.2027e-07	0.12027
										0.273902	7.42569e-07	0.742569		0.273902	1.50265e-07	0.150265
										0.274902	7.81549e-07	0.781549		0.274902	1.83091e-07	0.183091
										0.275902	8.19792e-07	0.819792		0.275902	2.15743e-07	0.215743
										0.276902	8.48518e-07	0.848518		0.276902	2.43374e-07	0.243374
										0.277902	8.63587e-07	0.863587		0.277902	2.62897e-07	0.262897
										0.278902	8.71828e-07	0.871828		0.278902	2.77205e-07	0.277205
										0.279902	8.83387e-07	0.883387		0.279902	2.92199e-07	0.292199
										0.280902	9.00645e-07	0.900645		0.280902	3.1024e-07	0.31024
										0.281902	9.20848e-07	0.920848		0.281902	3.29931e-07	0.329931
										0.282902	9.44111e-07	0.944111		0.282902	3.51093e-07	0.351093
										0.283902	9.70278e-07	0.970278		0.283902	3.73814e-07	0.373814
										0.284902	9.9698e-07	0.99698		0.284902	3.96687e-07	0.396687
										0.285902	1.02378e-06	1.02378		0.285902	4.19369e-07	0.419369
										0.286902	1.05319e-06	1.05319		0.286902	4.43042e-07	0.443042
										0.287902	1.08982e-06	1.08982		0.287902	4.70211e-07	0.470211
										0.288902	1.13273e-06	1.13273		0.288902	5.01411e-07	0.501411
										0.289902	1.17111e-06	1.17111		0.289902	5.30915e-07	0.530915
										0.290902	1.19834e-06	1.19834		0.290902	5.53634e-07	0.553634
										0.291902	1.21849e-06	1.21849		0.291902	5.71443e-07	0.571443
										0.292902	1.23251e-06	1.23251		0.292902	5.85673e-07	0.585673
										0.293902	1.23475e-06	1.23475		0.293902	5.93135e-07	0.593135
										0.294902	1.2196e-06	1.2196		0.294902	5.90486e-07	0.590486
										0.295902	1.1802e-06	1.1802		0.295902	5.73669e-07	0.573669
										0.296902	1.11166e-06	1.11166		0.296902	5.391e-07	0.5391
										0.297902	1.01562e-06	1.01562		0.297902	4.87506e-07	0.487506
										0.298902	8.93863e-07	0.893863		0.298902	4.20332e-07	0.420332
										0.299902	7.44759e-07	0.744759		0.299902	3.36777e-07	0.336777
										0.3	7.2866e-07	0.72866		0.3	3.27696e-07	0.327696

## Sheet: ACC
measured data						simulated data				mass-scaled simulated data
						0	0			0	0	0
1526029656040	0	-0.415146				3.97789e-07	-2.71115e-31			3.97789e-07	-2.71115e-31	-2.71115e-32
1526029656042	2	-1.01515				7.95578e-07	-1.65863e-29			7.95578e-07	-1.65863e-29	-1.65863e-30
1526029656044	4	0.0848542				1.19337e-06	-5.02964e-28			1.19337e-06	-5.02964e-28	-5.02964e-29
1526029656046	6	0.0848542				1.6906e-06	-1.69885e-25			1.6906e-06	-1.69885e-25	-1.69885e-26
1526029656048	8	-0.615146				2.31215e-06	-1.12109e-22			2.31215e-06	-1.12109e-22	-1.12109e-23
1526029656050	10	-1.11515				3.08908e-06	-4.98813e-20			3.08908e-06	-4.98813e-20	-4.98813e-21
1526029656052	12	0.0848542				4.06024e-06	-1.26605e-17			4.06024e-06	-1.26605e-17	-1.26605e-18
1526029656054	14	0.884854				5.2742e-06	-1.82106e-15			5.2742e-06	-1.82106e-15	-1.82106e-16
1526029656056	16	1.08485				6.79164e-06	-1.52257e-13			6.79164e-06	-1.52257e-13	-1.52257e-14
1526029656058	18	1.68485				8.68845e-06	-7.63129e-12			8.68845e-06	-7.63129e-12	-7.63129e-13
1526029656060	20	1.88485				1.10595e-05	-2.35747e-10			1.10595e-05	-2.35747e-10	-2.35747e-11
1526029656062	22	0.384854				1.40232e-05	-4.57824e-09			1.40232e-05	-4.57824e-09	-4.57824e-10
1526029656064	24	0.0848542				1.77279e-05	-5.61289e-08			1.77279e-05	-5.61289e-08	-5.61289e-09
1526029656066	26	0.784854				2.23588e-05	-4.20183e-07			2.23588e-05	-4.20183e-07	-4.20183e-08
1526029656068	28	1.18485				2.81474e-05	-1.59689e-06			2.81474e-05	-1.59689e-06	-1.59689e-07
1526029656070	30	0.184854				3.53831e-05	1.50685e-06			3.53831e-05	1.50685e-06	1.50685e-07
1526029656072	32	-1.01515				4.44278e-05	5.61037e-05			4.44278e-05	5.61037e-05	5.61037e-06
1526029656074	34	0.0848542				5.57336e-05	0.000359739			5.57336e-05	0.000359739	3.59739e-05
1526029656076	36	0.184854				6.98659e-05	0.00141359			6.98659e-05	0.00141359	0.000141359
1526029656078	38	-1.21515				8.75313e-05	0.00404736			8.75313e-05	0.00404736	0.000404736
1526029656080	40	-2.01515				0.000109613	0.00921127			0.000109613	0.00921127	0.000921127
1526029656082	42	-1.01515				0.000137215	0.0177515			0.000137215	0.0177515	0.00177515
1526029656084	44	-1.41515				0.000171718	0.0301372			0.000171718	0.0301372	0.00301372
1526029656086	46	-1.41515				0.000214846	0.0453063			0.000214846	0.0453063	0.00453063
1526029656088	48	-0.615146				0.000268757	0.0586534			0.000268757	0.0586534	0.00586534
1526029656090	50	-1.21515				0.000336145	0.0618651			0.000336145	0.0618651	0.00618651
1526029656092	52	-1.11515				0.00042038	0.0467013			0.00042038	0.0467013	0.00467013
1526029656094	54	-1.21515				0.000525674	0.00958039			0.000525674	0.00958039	0.000958039
1526029656096	56	-0.415146				0.000657291	-0.0476255			0.000657291	-0.0476255	-0.00476255
1526029656098	58	-0.315146				0.000821812	-0.119951			0.000821812	-0.119951	-0.0119951
1526029656100	60	-2.51515				0.00102746	-0.20118			0.00102746	-0.20118	-0.020118
1526029656102	62	-0.615146				0.00128453	-0.284167			0.00128453	-0.284167	-0.0284167
1526029656104	64	2.28485				0.00160586	-0.361141			0.00160586	-0.361141	-0.0361141
1526029656106	66	0.0848542				0.00200752	-0.424402			0.00200752	-0.424402	-0.0424402
1526029656108	68	0.884854				0.0025096	-0.468303			0.0025096	-0.468303	-0.0468303
1526029656110	70	1.18485				0.0031372	-0.489606			0.0031372	-0.489606	-0.0489606
1526029656112	72	2.78485				0.0039217	-0.484849			0.0039217	-0.484849	-0.0484849
1526029656114	74	-1.11515				0.00490233	-0.453719			0.00490233	-0.453719	-0.0453719
1526029656116	76	-1.91515				0.00590233	-0.407928			0.00590233	-0.407928	-0.0407928
1526029656118	78	2.48485				0.00690233	-0.352086			0.00690233	-0.352086	-0.0352086
1526029656120	80	-2.71515				0.00790233	-0.286242			0.00790233	-0.286242	-0.0286242
1526029656122	82	-0.615146				0.00890233	-0.212142			0.00890233	-0.212142	-0.0212142
1526029656124	84	-0.615146				0.00990233	-0.133197			0.00990233	-0.133197	-0.0133197
1526029656126	86	0.884854				0.0109023	-0.0565573			0.0109023	-0.0565573	-0.00565573
1526029656128	88	-4.21515				0.0119023	0.00409193			0.0119023	0.00409193	0.000409193
1526029656130	90	-4.21515				0.0129023	0.049795			0.0129023	0.049795	0.0049795
1526029656132	92	-1.61515				0.0139023	0.0962618			0.0139023	0.0962618	0.00962618
1526029656134	94	-7.31515				0.0149023	0.140948			0.0149023	0.140948	0.0140948
1526029656136	96	-9.51515				0.0159023	0.169556			0.0159023	0.169556	0.0169556
1526029656138	98	-7.41515				0.0169023	0.182753			0.0169023	0.182753	0.0182753
1526029656140	100	-8.01515				0.0179023	0.189448			0.0179023	0.189448	0.0189448
1526029656142	102	-15.5151				0.0189023	0.194775			0.0189023	0.194775	0.0194775
1526029656144	104	-14.2151				0.0199023	0.200298			0.0199023	0.200298	0.0200298
1526029656146	106	-4.11515				0.0209023	0.206137			0.0209023	0.206137	0.0206137
1526029656148	108	-18.6151				0.0219023	0.20911			0.0219023	0.20911	0.020911
1526029656150	110	-10.3151				0.0229023	0.207406			0.0229023	0.207406	0.0207406
1526029656152	112	-11.0151				0.0239023	0.204236			0.0239023	0.204236	0.0204236
1526029656154	114	-12.6151				0.0249023	0.200262			0.0249023	0.200262	0.0200262
1526029656156	116	-23.8151				0.0259023	0.187695			0.0259023	0.187695	0.0187695
1526029656158	118	-20.1151				0.0269023	0.166644			0.0269023	0.166644	0.0166644
1526029656160	120	-12.5151				0.0279023	0.153104			0.0279023	0.153104	0.0153104
1526029656162	122	-40.8151				0.0289023	0.143962			0.0289023	0.143962	0.0143962
1526029656164	124	-72.0151				0.0299023	0.127283			0.0299023	0.127283	0.0127283
1526029656166	126	-46.0151				0.0309023	0.114774			0.0309023	0.114774	0.0114774
1526029656168	128	-4.21515				0.0319023	0.112793			0.0319023	0.112793	0.0112793
1526029656170	130	15.3849				0.0329023	0.112184			0.0329023	0.112184	0.0112184
1526029656172	132	49.2849				0.0339023	0.104789			0.0339023	0.104789	0.0104789
1526029656174	134	66.6849				0.0349023	0.0890555			0.0349023	0.0890555	0.00890555
1526029656176	136	57.6849				0.0359023	0.0716022			0.0359023	0.0716022	0.00716022
1526029656178	138	58.3849				0.0369023	0.0630317			0.0369023	0.0630317	0.00630317
1526029656180	140	73.2849				0.0379023	0.0609896			0.0379023	0.0609896	0.00609896
1526029656182	142	87.0849				0.0389023	0.0579575			0.0389023	0.0579575	0.00579575
1526029656184	144	63.9849				0.0399023	0.0535968			0.0399023	0.0535968	0.00535968
1526029656186	146	42.6849				0.0409023	0.0346699			0.0409023	0.0346699	0.00346699
1526029656188	148	30.4849				0.0419023	0.00277123			0.0419023	0.00277123	0.000277123
1526029656190	150	23.7849				0.0429023	-0.017069			0.0429023	-0.017069	-0.0017069
1526029656192	152	-40.0151				0.0439023	-0.0227253			0.0439023	-0.0227253	-0.00227253
1526029656194	154	-22.3151				0.0449023	-0.0251227			0.0449023	-0.0251227	-0.00251227
1526029656196	156	5.58485				0.0459023	-0.0300131			0.0459023	-0.0300131	-0.00300131
1526029656198	158	-2.61515				0.0469023	-0.0439637			0.0469023	-0.0439637	-0.00439637
1526029656200	160	-16.1151				0.0479023	-0.0645307			0.0479023	-0.0645307	-0.00645307
1526029656202	162	-8.71515				0.0489023	-0.0687083			0.0489023	-0.0687083	-0.00687083
1526029656204	164	4.28485				0.0499023	-0.0446557			0.0499023	-0.0446557	-0.00446557
1526029656206	166	-8.71515				0.0509023	-0.0157642			0.0509023	-0.0157642	-0.00157642
1526029656208	168	-14.6151				0.0519023	-0.00988962			0.0519023	-0.00988962	-0.000988962
1526029656210	170	-2.61515				0.0529023	-0.0164099			0.0529023	-0.0164099	-0.00164099
1526029656212	172	4.88485				0.0539023	-0.00699889			0.0539023	-0.00699889	-0.000699889
1526029656214	174	-9.41515				0.0549023	0.00270432			0.0549023	0.00270432	0.000270432
1526029656216	176	-7.21515				0.0559023	-0.00993246			0.0559023	-0.00993246	-0.000993246
1526029656218	178	1.08485				0.0569023	-0.0291702			0.0569023	-0.0291702	-0.00291702
1526029656220	180	0.0848542				0.0579023	-0.0372463			0.0579023	-0.0372463	-0.00372463
1526029656222	182	-10.1151				0.0589023	-0.0234841			0.0589023	-0.0234841	-0.00234841
1526029656224	184	-5.61515				0.0599023	-0.0100498			0.0599023	-0.0100498	-0.00100498
1526029656226	186	2.88485				0.0609023	-0.0234788			0.0609023	-0.0234788	-0.00234788
1526029656228	188	-3.61515				0.0619023	-0.0283844			0.0619023	-0.0283844	-0.00283844
1526029656230	190	-10.1151				0.0629023	-0.0139022			0.0629023	-0.0139022	-0.00139022
1526029656232	192	-2.01515				0.0639023	-0.0220239			0.0639023	-0.0220239	-0.00220239
1526029656234	194	3.28485				0.0649023	-0.0445085			0.0649023	-0.0445085	-0.00445085
1526029656236	196	-5.01515				0.0659023	-0.0442025			0.0659023	-0.0442025	-0.00442025
1526029656238	198	-4.21515				0.0669023	-0.0326782			0.0669023	-0.0326782	-0.00326782
1526029656240	200	0.784854				0.0679023	-0.0283656			0.0679023	-0.0283656	-0.00283656
1526029656242	202	2.48485				0.0689023	-0.0335094			0.0689023	-0.0335094	-0.00335094
1526029656244	204	-4.11515				0.0699023	-0.0543655			0.0699023	-0.0543655	-0.00543655
1526029656246	206	-0.715146				0.0709023	-0.0743548			0.0709023	-0.0743548	-0.00743548
1526029656248	208	3.48485				0.0719023	-0.0676291			0.0719023	-0.0676291	-0.00676291
1526029656250	210	1.58485				0.0729023	-0.0677963			0.0729023	-0.0677963	-0.00677963
1526029656252	212	-5.61515				0.0739023	-0.0790773			0.0739023	-0.0790773	-0.00790773
1526029656254	214	0.184854				0.0749023	-0.0733414			0.0749023	-0.0733414	-0.00733414
1526029656256	216	3.28485				0.0759023	-0.0630224			0.0759023	-0.0630224	-0.00630224
1526029656258	218	-1.71515				0.0769023	-0.0621116			0.0769023	-0.0621116	-0.00621116
1526029656260	220	-3.51515				0.0779023	-0.0586509			0.0779023	-0.0586509	-0.00586509
1526029656262	222	1.68485				0.0789023	-0.0151196			0.0789023	-0.0151196	-0.00151196
1526029656264	224	1.68485				0.0799023	0.0100504			0.0799023	0.0100504	0.00100504
1526029656266	226	-4.01515				0.0809023	-0.0347108			0.0809023	-0.0347108	-0.00347108
1526029656268	228	-2.61515				0.0819023	-0.0438896			0.0819023	-0.0438896	-0.00438896
1526029656270	230	0.784854				0.0829023	0.0142036			0.0829023	0.0142036	0.00142036
1526029656272	232	0.884854				0.0839023	0.0403776			0.0839023	0.0403776	0.00403776
1526029656274	234	-4.11515				0.0849023	-0.0186424			0.0849023	-0.0186424	-0.00186424
1526029656276	236	-1.21515				0.0859023	-0.0543914			0.0859023	-0.0543914	-0.00543914
1526029656278	238	1.68485				0.0869023	-0.0372322			0.0869023	-0.0372322	-0.00372322
1526029656280	240	-0.615146				0.0879023	-0.00606311			0.0879023	-0.00606311	-0.000606311
1526029656282	242	-4.31515				0.0889023	0.0425761			0.0889023	0.0425761	0.00425761
1526029656284	244	-0.415146				0.0899023	0.0538077			0.0899023	0.0538077	0.00538077
1526029656286	246	1.58485				0.0909023	0.0346841			0.0909023	0.0346841	0.00346841
1526029656288	248	0.0848542				0.0919023	0.0304715			0.0919023	0.0304715	0.00304715
1526029656290	250	-2.01515				0.0929023	-0.00778135			0.0929023	-0.00778135	-0.000778135
1526029656292	252	1.08485				0.0939023	-0.0380219			0.0939023	-0.0380219	-0.00380219
1526029656294	254	2.48485				0.0949023	-0.0114865			0.0949023	-0.0114865	-0.00114865
1526029656296	256	-2.01515				0.0959023	0.0173299			0.0959023	0.0173299	0.00173299
1526029656298	258	-1.01515				0.0969023	-0.0250491			0.0969023	-0.0250491	-0.00250491
1526029656300	260	1.68485				0.0979023	-0.0364374			0.0979023	-0.0364374	-0.00364374
1526029656302	262	0.784854				0.0989023	0.0370089			0.0989023	0.0370089	0.00370089
1526029656304	264	-2.81515				0.0999023	0.0789983			0.0999023	0.0789983	0.00789983
1526029656306	266	-1.51515				0.100902	0.0289151			0.100902	0.0289151	0.00289151
1526029656308	268	0.884854				0.101902	-0.0105806			0.101902	-0.0105806	-0.00105806
1526029656310	270	-0.315146				0.102902	0.0868075			0.102902	0.0868075	0.00868075
1526029656312	272	-2.81515				0.103902	0.148615			0.103902	0.148615	0.0148615
1526029656314	274	-1.21515				0.104902	-0.00483337			0.104902	-0.00483337	-0.000483337
1526029656316	276	1.28485				0.105902	-0.0815137			0.105902	-0.0815137	-0.00815137
1526029656318	278	-0.415146				0.106902	0.0733723			0.106902	0.0733723	0.00733723
1526029656320	280	-1.51515				0.107902	0.182548			0.107902	0.182548	0.0182548
1526029656322	282	0.884854				0.108902	0.0444232			0.108902	0.0444232	0.00444232
1526029656324	284	1.68485				0.109902	0.0442525			0.109902	0.0442525	0.00442525
1526029656326	286	-0.415146				0.110902	0.202451			0.110902	0.202451	0.0202451
1526029656328	288	-1.51515				0.111902	0.199461			0.111902	0.199461	0.0199461
1526029656330	290	0.384854				0.112902	-0.0434328			0.112902	-0.0434328	-0.00434328
1526029656332	292	0.184854				0.113902	-0.110825			0.113902	-0.110825	-0.0110825
1526029656334	294	-2.01515				0.114902	0.0462873			0.114902	0.0462873	0.00462873
1526029656336	296	-0.415146				0.115902	0.10992			0.115902	0.10992	0.010992
1526029656338	298	1.68485				0.116902	-0.0898759			0.116902	-0.0898759	-0.00898759
1526029656340	300	0.0848542				0.117902	-0.122238			0.117902	-0.122238	-0.0122238
						0.118902	0.0345652			0.118902	0.0345652	0.00345652
						0.119902	0.113922			0.119902	0.113922	0.0113922
						0.120902	-0.0852763			0.120902	-0.0852763	-0.00852763
						0.121902	-0.137526			0.121902	-0.137526	-0.0137526
						0.122902	0.133244			0.122902	0.133244	0.0133244
						0.123902	0.149406			0.123902	0.149406	0.0149406
						0.124902	-0.261991			0.124902	-0.261991	-0.0261991
						0.125902	-0.385053			0.125902	-0.385053	-0.0385053
						0.126902	-0.108452			0.126902	-0.108452	-0.0108452
						0.127902	0.0144281			0.127902	0.0144281	0.00144281
						0.128902	-0.311558			0.128902	-0.311558	-0.0311558
						0.129902	-0.459128			0.129902	-0.459128	-0.0459128
						0.130902	-0.0841211			0.130902	-0.0841211	-0.00841211
						0.131902	0.0437757			0.131902	0.0437757	0.00437757
						0.132902	-0.438128			0.132902	-0.438128	-0.0438128
						0.133902	-0.743097			0.133902	-0.743097	-0.0743097
						0.134902	-0.379075			0.134902	-0.379075	-0.0379075
						0.135902	0.0986665			0.135902	0.0986665	0.00986665
						0.136902	-0.353592			0.136902	-0.353592	-0.0353592
						0.137902	-0.519789			0.137902	-0.519789	-0.0519789
						0.138902	-0.324006			0.138902	-0.324006	-0.0324006
						0.139902	0.141166			0.139902	0.141166	0.0141166
						0.140902	-0.679865			0.140902	-0.679865	-0.0679865
						0.141902	-0.0424407			0.141902	-0.0424407	-0.00424407
						0.142902	-0.17518			0.142902	-0.17518	-0.017518
						0.143902	0.386096			0.143902	0.386096	0.0386096
						0.144902	0.516414			0.144902	0.516414	0.0516414
						0.145902	-0.0776524			0.145902	-0.0776524	-0.00776524
						0.146902	0.357366			0.146902	0.357366	0.0357366
						0.147902	0.793098			0.147902	0.793098	0.0793098
						0.148902	0.275963			0.148902	0.275963	0.0275963
						0.149902	0.561326			0.149902	0.561326	0.0561326
						0.150902	0.51047			0.150902	0.51047	0.051047
						0.151902	0.727751			0.151902	0.727751	0.0727751
						0.152902	0.218335			0.152902	0.218335	0.0218335
						0.153902	0.970332			0.153902	0.970332	0.0970332
						0.154902	1.02806			0.154902	1.02806	0.102806
						0.155902	0.902163			0.155902	0.902163	0.0902163
						0.156902	0.0360778			0.156902	0.0360778	0.00360778
						0.157902	0.784994			0.157902	0.784994	0.0784994
						0.158902	0.261356			0.158902	0.261356	0.0261356
						0.159902	0.143684			0.159902	0.143684	0.0143684
						0.160902	0.171765			0.160902	0.171765	0.0171765
						0.161902	0.0452223			0.161902	0.0452223	0.00452223
						0.162902	-0.193439			0.162902	-0.193439	-0.0193439
						0.163902	-0.286871			0.163902	-0.286871	-0.0286871
						0.164902	-0.478572			0.164902	-0.478572	-0.0478572
						0.165902	0.207			0.165902	0.207	0.0207
						0.166902	-0.0968435			0.166902	-0.0968435	-0.00968435
						0.167902	-0.452719			0.167902	-0.452719	-0.0452719
						0.168902	-0.279747			0.168902	-0.279747	-0.0279747
						0.169902	0.235981			0.169902	0.235981	0.0235981
						0.170902	-0.123234			0.170902	-0.123234	-0.0123234
						0.171902	-0.212307			0.171902	-0.212307	-0.0212307
						0.172902	-0.100743			0.172902	-0.100743	-0.0100743
						0.173902	0.136757			0.173902	0.136757	0.0136757
						0.174902	-0.0504682			0.174902	-0.0504682	-0.00504682
						0.175902	-0.183187			0.175902	-0.183187	-0.0183187
						0.176902	-0.00283365			0.176902	-0.00283365	-0.000283365
						0.177902	0.0431562			0.177902	0.0431562	0.00431562
						0.178902	-0.15975			0.178902	-0.15975	-0.015975
						0.179902	-0.222808			0.179902	-0.222808	-0.0222808
						0.180902	-0.0501935			0.180902	-0.0501935	-0.00501935
						0.181902	0.124595			0.181902	0.124595	0.0124595
						0.182902	0.0499155			0.182902	0.0499155	0.00499155
						0.183902	-0.130558			0.183902	-0.130558	-0.0130558
						0.184902	-0.0904904			0.184902	-0.0904904	-0.00904904
						0.185902	0.110285			0.185902	0.110285	0.0110285
						0.186902	0.0433264			0.186902	0.0433264	0.00433264
						0.187902	-0.140421			0.187902	-0.140421	-0.0140421
						0.188902	-0.121391			0.188902	-0.121391	-0.0121391
						0.189902	0.0144535			0.189902	0.0144535	0.00144535
						0.190902	-0.0225784			0.190902	-0.0225784	-0.00225784
						0.191902	-0.066142			0.191902	-0.066142	-0.0066142
						0.192902	-0.0137506			0.192902	-0.0137506	-0.00137506
						0.193902	0.00501956			0.193902	0.00501956	0.000501956
						0.194902	-0.0708912			0.194902	-0.0708912	-0.00708912
						0.195902	-0.123406			0.195902	-0.123406	-0.0123406
						0.196902	-0.0699051			0.196902	-0.0699051	-0.00699051
						0.197902	0.0169636			0.197902	0.0169636	0.00169636
						0.198902	-0.0687445			0.198902	-0.0687445	-0.00687445
						0.199902	-0.173171			0.199902	-0.173171	-0.0173171
						0.200902	-0.105841			0.200902	-0.105841	-0.0105841
						0.201902	-0.0303477			0.201902	-0.0303477	-0.00303477
						0.202902	-0.0377296			0.202902	-0.0377296	-0.00377296
						0.203902	-0.0991197			0.203902	-0.0991197	-0.00991197
						0.204902	-0.112985			0.204902	-0.112985	-0.0112985
						0.205902	-0.0485701			0.205902	-0.0485701	-0.00485701
						0.206902	-0.0487267			0.206902	-0.0487267	-0.00487267
						0.207902	-0.0934574			0.207902	-0.0934574	-0.00934574
						0.208902	-0.0558673			0.208902	-0.0558673	-0.00558673
						0.209902	0.0128926			0.209902	0.0128926	0.00128926
						0.210902	-0.00554593			0.210902	-0.00554593	-0.000554593
						0.211902	-0.052217			0.211902	-0.052217	-0.0052217
						0.212902	-0.0354424			0.212902	-0.0354424	-0.00354424
						0.213902	-0.0137193			0.213902	-0.0137193	-0.00137193
						0.214902	-0.027823			0.214902	-0.027823	-0.0027823
						0.215902	-0.055338			0.215902	-0.055338	-0.0055338
						0.216902	-0.0403681			0.216902	-0.0403681	-0.00403681
						0.217902	-0.00890691			0.217902	-0.00890691	-0.000890691
						0.218902	-0.040624			0.218902	-0.040624	-0.0040624
						0.219902	-0.0629151			0.219902	-0.0629151	-0.00629151
						0.220902	-0.00975007			0.220902	-0.00975007	-0.000975007
						0.221902	0.0403771			0.221902	0.0403771	0.00403771
						0.222902	0.0354435			0.222902	0.0354435	0.00354435
						0.223902	0.00733402			0.223902	0.00733402	0.000733402
						0.224902	-0.00704246			0.224902	-0.00704246	-0.000704246
						0.225902	0.0108098			0.225902	0.0108098	0.00108098
						0.226902	0.0333736			0.226902	0.0333736	0.00333736
						0.227902	0.0179659			0.227902	0.0179659	0.00179659
						0.228902	-0.00047114			0.228902	-0.00047114	-4.7114e-05
						0.229902	0.00953463			0.229902	0.00953463	0.000953463
						0.230902	0.0126426			0.230902	0.0126426	0.00126426
						0.231902	0.00605507			0.231902	0.00605507	0.000605507
						0.232902	0.0187129			0.232902	0.0187129	0.00187129
						0.233902	0.0358387			0.233902	0.0358387	0.00358387
						0.234902	0.0332485			0.234902	0.0332485	0.00332485
						0.235902	0.0251238			0.235902	0.0251238	0.00251238
						0.236902	0.0261534			0.236902	0.0261534	0.00261534
						0.237902	0.0292543			0.237902	0.0292543	0.00292543
						0.238902	0.0447599			0.238902	0.0447599	0.00447599
						0.239902	0.0672955			0.239902	0.0672955	0.00672955
						0.240902	0.0778683			0.240902	0.0778683	0.00778683
						0.241902	0.064299			0.241902	0.064299	0.0064299
						0.242902	0.0255557			0.242902	0.0255557	0.00255557
						0.243902	-0.0039095			0.243902	-0.0039095	-0.00039095
						0.244902	-0.0057266			0.244902	-0.0057266	-0.00057266
						0.245902	0.00873366			0.245902	0.00873366	0.000873366
						0.246902	0.0256389			0.246902	0.0256389	0.00256389
						0.247902	0.0351584			0.247902	0.0351584	0.00351584
						0.248902	0.044182			0.248902	0.044182	0.0044182
						0.249902	0.0463855			0.249902	0.0463855	0.00463855
						0.250902	0.0311117			0.250902	0.0311117	0.00311117
						0.251902	0.0148524			0.251902	0.0148524	0.00148524
						0.252902	0.0163096			0.252902	0.0163096	0.00163096
						0.253902	0.0251721			0.253902	0.0251721	0.00251721
						0.254902	0.0230695			0.254902	0.0230695	0.00230695
						0.255902	0.0222625			0.255902	0.0222625	0.00222625
						0.256902	0.034766			0.256902	0.034766	0.0034766
						0.257902	0.0273607			0.257902	0.0273607	0.00273607
						0.258902	0.00219522			0.258902	0.00219522	0.000219522
						0.259902	0.000190162			0.259902	0.000190162	1.90162e-05
						0.260902	0.00190053			0.260902	0.00190053	0.000190053
						0.261902	-0.0230565			0.261902	-0.0230565	-0.00230565
						0.262902	-0.0527044			0.262902	-0.0527044	-0.00527044
						0.263902	-0.0660234			0.263902	-0.0660234	-0.00660234
						0.264902	-0.0620608			0.264902	-0.0620608	-0.00620608
						0.265902	-0.0444464			0.265902	-0.0444464	-0.00444464
						0.266902	-0.0259825			0.266902	-0.0259825	-0.00259825
						0.267902	-0.0103709			0.267902	-0.0103709	-0.00103709
						0.268902	0.00157612			0.268902	0.00157612	0.000157612
						0.269902	0.000874665			0.269902	0.000874665	8.74665e-05
						0.270902	-0.00153305			0.270902	-0.00153305	-0.000153305
						0.271902	0.000243604			0.271902	0.000243604	2.43604e-05
						0.272902	-0.00597444			0.272902	-0.00597444	-0.000597444
						0.273902	-0.0153978			0.273902	-0.0153978	-0.00153978
						0.274902	-0.0215339			0.274902	-0.0215339	-0.00215339
						0.275902	-0.0196546			0.275902	-0.0196546	-0.00196546
						0.276902	-0.00504824			0.276902	-0.00504824	-0.000504824
						0.277902	0.00849759			0.277902	0.00849759	0.000849759
						0.278902	0.00838608			0.278902	0.00838608	0.000838608
						0.279902	-0.000948596			0.279902	-0.000948596	-9.48596e-05
						0.280902	-0.00603999			0.280902	-0.00603999	-0.000603999
						0.281902	-0.0080995			0.281902	-0.0080995	-0.00080995
						0.282902	-0.0144604			0.282902	-0.0144604	-0.00144604
						0.283902	-0.0182191			0.283902	-0.0182191	-0.00182191
						0.284902	-0.0184598			0.284902	-0.0184598	-0.00184598
						0.285902	-0.0204181			0.285902	-0.0204181	-0.00204181
						0.286902	-0.0257275			0.286902	-0.0257275	-0.00257275
						0.287902	-0.0366529			0.287902	-0.0366529	-0.00366529
						0.288902	-0.0428455			0.288902	-0.0428455	-0.00428455
						0.289902	-0.0338815			0.289902	-0.0338815	-0.00338815
						0.290902	-0.0235052			0.290902	-0.0235052	-0.00235052
						0.291902	-0.0210606			0.291902	-0.0210606	-0.00210606
						0.292902	-0.0143518			0.292902	-0.0143518	-0.00143518
						0.293902	-0.000860255			0.293902	-0.000860255	-8.60255e-05
						0.294902	0.0150854			0.294902	0.0150854	0.00150854
						0.295902	0.0400786			0.295902	0.0400786	0.00400786
						0.296902	0.0699111			0.296902	0.0699111	0.00699111
						0.297902	0.096054			0.297902	0.096054	0.0096054
						0.298902	0.12317			0.298902	0.12317	0.012317
						0.299902	0.154451			0.299902	0.154451	0.0154451
						0.3	0.159106			0.3	0.159106	0.0159106
