# Supplementary material for: Investigating the Pavement Vibration Response for Roadway Service Condition Evaluation
Source: Hindawi journal article supplement (doi:10.1155/2018/2714657), 2018-01-01
Supplement: f1 [file 2714657.f1.zip › data/Figure9.xlsx]

## Sheet: Sheet1
0	49169.1			0	49043.4		0	47507.9
7.40713e-05	49180			7.40713e-05	49046.2		7.40713e-05	47412.3
0.000444428	49233.9			0.000444428	49060		0.000444428	46936
0.001	49007.5			0.001	50153.7		0.001	47330.2
0.002	49192.8			0.002	50432.9		0.002	44919.7
0.003	49393.7			0.003	50594.1		0.003	48604.4
0.004	49435.8			0.004	50364		0.004	44795
0.005	48965.1			0.005	51141.1		0.005	46024.6
0.006	49051.8			0.006	50743.6		0.006	48049.2
0.007	48274.3			0.007	46994.9		0.007	47867.7
0.008	48000.5			0.008	47409.3		0.008	49316.8
0.009	48710.8			0.009	46240.6		0.009	48659.4
0.01	48743.6			0.01	43012.1		0.01	48426.5
0.011	47727.4			0.011	43126.9		0.011	49140.4
0.012	47611			0.012	42551.6		0.012	47325.6
0.013	47826.5			0.013	42235		0.013	44589.5
0.014	48282.9			0.014	42988.2		0.014	43220.6
0.015	48611.3			0.015	40551.9		0.015	38929.5
0.016	48819			0.016	42259.4		0.016	36626
0.017	48870.9			0.017	40095.2		0.017	35248.3
0.018	48503.5			0.018	37763.3		0.018	39015.8
0.019	48745.2			0.019	40470.7		0.019	40906.7
0.02	48525.5			0.02	38723.8		0.02	43069.5
0.021	48506.4			0.021	37332.2		0.021	42510.7
0.022	47829.8			0.022	36748.5		0.022	42727.6
0.023	48401.8			0.023	36021.3		0.023	44600.9
0.024	49076.2			0.024	36318.6		0.024	47446.4
0.025	48257.2			0.025	37721.3		0.025	48467.4
0.026	48583.6			0.026	39099.4		0.026	49638.4
0.027	48950.5			0.027	38868.6		0.027	48119.5
0.028	48931.4			0.028	40836.7		0.028	52639.6
0.029	48433.2			0.029	43365.7		0.029	48990.3
0.03	48020.5			0.03	44334.3		0.03	50289.5
0.031	48048.4			0.031	43990		0.031	52125.4
0.032	48270.6			0.032	44792.2		0.032	51271.3
0.033	48692.8			0.033	48620.6		0.033	50319.3
0.034	48325.2			0.034	45301.6		0.034	46799.8
0.035	48221.9			0.035	47516.2		0.035	44594.8
0.036	48481.9			0.036	47742.4		0.036	43077.6
0.037	47745.3			0.037	48683.6		0.037	40636
0.038	48655.9			0.038	49344.3		0.038	40937.2
0.039	49567.1			0.039	49720		0.039	42770.3
0.04	50307			0.04	47749.5		0.04	44661.3
0.041	50579.9			0.041	46428.3		0.041	43595
0.042	50842.3			0.042	49109.5		0.042	42296.6
0.043	51322.7			0.043	50801.6		0.043	41713.5
0.044	52057.4			0.044	51032.5		0.044	40817.4
0.045	53371.9			0.045	54150.7		0.045	46174.8
0.046	53694.7			0.046	53602		0.046	44222.3
0.047	53555.4			0.047	55933.2		0.047	47181
0.048	52986.1			0.048	54102.5		0.048	46617.1
0.049	53065.2			0.049	55567.1		0.049	51590.6
0.05	53233.5			0.05	54744.1		0.05	52135.5
0.051	52735.4			0.051	53568.2		0.051	51755.4
0.052	52284.3			0.052	50907.9		0.052	49063.1
0.053	52606.7			0.053	47866.7		0.053	47578.5
0.054	52377.8			0.054	49391.5		0.054	48572
0.055	52790.4			0.055	50540.3		0.055	48033.2
0.056	52370.2			0.056	48762.5		0.056	48463.1
0.057	51619.5			0.057	47271.5		0.057	48679.7
0.058	51659			0.058	48653.3		0.058	47799.3
0.059	51546.8			0.059	46992.4		0.059	47570.4
0.06	50884.1			0.06	47597.5		0.06	47453.7
0.061	50726.5			0.061	48225		0.061	49958.4
0.062	50827.8			0.062	50582.9		0.062	47912.5
0.063	50468.5			0.063	48784.2		0.063	48133
0.064	50279.6			0.064	48644		0.064	47498.3
0.065	50013.9			0.065	46924.4		0.065	50334.4
0.066	49389			0.066	44069.6		0.066	51055.7
0.067	49360.5			0.067	43569.3		0.067	48244.6
0.068	50076			0.068	42947.6		0.068	44906.2
0.069	50097			0.069	42513		0.069	43585.3
0.07	49508.9			0.07	44226.7		0.07	43346.8
0.071	50077.8			0.071	44857.3		0.071	47963
0.072	50008			0.072	44237.7		0.072	47426.5
0.073	50588.1			0.073	44290.3		0.073	52902
0.074	49856.3			0.074	45679.3		0.074	53446.8
0.075	50295			0.075	45094.2		0.075	56332.2
0.076	50040.4			0.076	46269.8		0.076	58445.8
0.077	49242.8			0.077	45142.9		0.077	59475.1
0.078	49452.8			0.078	47633		0.078	58679.9
0.079	49635.6			0.079	46134.1		0.079	61391
0.08	49437.8			0.08	47857.6		0.08	59744.4
0.081	48600.2			0.081	47988		0.081	60716.4
0.082	48579.3			0.082	47712.5		0.082	61240.3
0.083	49162.2			0.083	47405.4		0.083	63893.6
0.084	49318.4			0.084	45604		0.084	63780
0.085	50089.8			0.085	44656		0.085	64549.8
0.086	48968.4			0.086	42966.7		0.086	62853.6
0.087	48003.3			0.087	40166.5		0.087	62785.6
0.088	48367.6			0.088	37451.6		0.088	62950.7
0.089	48666			0.089	37661.7		0.089	61107.1
0.09	48463.9			0.09	37025.7		0.09	59531.4
0.091	48630			0.091	35814.2		0.091	54432.5
0.092	49221.1			0.092	38753.3		0.092	54678.9
0.093	49626.2			0.093	38975.2		0.093	54662.7
0.094	49544.7			0.094	40920.3		0.094	54898.4
0.095	49849			0.095	40553.3		0.095	51700.6
0.096	50036.9			0.096	40899.5		0.096	48604.2
0.097	50210.3			0.097	42115		0.097	47925.8
0.098	49933.2			0.098	43680		0.098	50424.2
0.099	49714.2			0.099	42247.3		0.099	45180.7
0.1	50327.2			0.1	45639.6		0.1	47511.4
0.101	49492.6			0.101	44730		0.101	45681.1
0.102	49641.4			0.102	45852.1		0.102	45816.3
0.103	49890.3			0.103	46378.2		0.103	46097.7
0.104	50697.3			0.104	45267.8		0.104	46731.2
0.105	49803.4			0.105	44668.1		0.105	44514.4
0.106	49622			0.106	46780.9		0.106	43964.4
0.107	49110.4			0.107	45397.2		0.107	42452.6
0.108	48407.1			0.108	44650		0.108	40103.3
0.109	47717.8			0.109	45561.6		0.109	44352.5
0.11	47650.3			0.11	46190.4		0.11	38940.4
0.111	47901.6			0.111	47497.4		0.111	40920.7
0.112	47801.2			0.112	49547.6		0.112	39405.1
0.113	48065.5			0.113	47492.9		0.113	36693.4
0.114	47923.4			0.114	45752.5		0.114	40181
0.115	48008.9			0.115	44260		0.115	39197.7
0.116	47435.2			0.116	43252.4		0.116	37681.9
0.117	48113.4			0.117	43948.9		0.117	37233.5
0.118	47698.1			0.118	41318.4		0.118	40846.4
0.119	47554.9			0.119	42169.8		0.119	36487.4
0.12	46664			0.12	42347.9		0.12	38647.9
0.121	46373.4			0.121	42239.3		0.121	35461.2
0.122	46494.6			0.122	46346.5		0.122	32843.9
0.123	46908.6			0.123	47873.2		0.123	35089.3
0.124	46941.8			0.124	46592.3		0.124	33635.1
0.125	47444.9			0.125	44276.6		0.125	38740.2
0.126	48050.8			0.126	46104.4		0.126	40526.6
0.127	48014.1			0.127	46085.6		0.127	42073.6
0.128	48234.4			0.128	49950.8		0.128	41889.9
0.129	48032.7			0.129	50227.7		0.129	45110.9
0.13	48901.3			0.13	51935.1		0.13	42254.1
0.131	48886.8			0.131	52171.2		0.131	48698.9
0.132	50079.2			0.132	51053.4		0.132	48466.7
0.133	50115.1			0.133	52173.7		0.133	47906.6
0.134	50476.3			0.134	55582		0.134	50902.9
0.135	50052			0.135	55483.1		0.135	52936
0.136	50396.4			0.136	56299.9		0.136	56650
0.137	50130.4			0.137	57712.7		0.137	59895.2
0.138	50022.3			0.138	59034.2		0.138	63057.6
0.139	50771.1			0.139	58655.4		0.139	64122.8
0.14	50056			0.14	58865.6		0.14	63678.1
0.141	50661.8			0.141	62019.3		0.141	63298.4
0.142	50031.8			0.142	61816.6		0.142	66335.2
0.143	49390			0.143	61909		0.143	67097.4
0.144	49646.1			0.144	60181.8		0.144	67812.2
0.145	49557.2			0.145	60640.8		0.145	67336.2
0.146	49469.4			0.146	60562.3		0.146	69421.7
0.147	49803.2			0.147	60803.9		0.147	68946.2
0.148	50018			0.148	58758.5		0.148	67154.8
0.149	50516.2			0.149	60062.2		0.149	67031.6
0.15	51034.3			0.15	60533.1		0.15	61636.6
0.151	52162.6			0.151	57437.8		0.151	59802.3
0.152	52255.1			0.152	54029.8		0.152	60363.9
0.153	52105.4			0.153	54006.6		0.153	60651.1
0.154	51927.2			0.154	56651.2		0.154	61297.6
0.155	52918.2			0.155	58310.7		0.155	60580.7
0.156	52200.8			0.156	60407.6		0.156	58651.2
0.157	52487.1			0.157	57971.9		0.157	60047.6
0.158	52410.8			0.158	57878.7		0.158	61884.6
0.159	51996.5			0.159	59394.9		0.159	65107.6
0.16	52159.4			0.16	58274.4		0.16	66280.4
0.161	51963.4			0.161	59640.4		0.161	63792.4
0.162	51859.3			0.162	55577.4		0.162	64033.7
0.163	52617.1			0.163	56587.4		0.163	60773.1
0.164	51679			0.164	55891.7		0.164	60976.3
0.165	51358			0.165	55529.9		0.165	57985.4
0.166	51447.5			0.166	53703.2		0.166	57557.2
0.167	51425.8			0.167	53075.5		0.167	51699.9
0.168	50502.3			0.168	51488.4		0.168	46072.1
0.169	50708.2			0.169	46687.7		0.169	44172.7
0.17	49545.9			0.17	44098.2		0.17	42839.5
0.171	49583.4			0.171	45870.5		0.171	41475.1
0.172	48972.8			0.172	45460.1		0.172	40913.1
0.173	49034.3			0.173	45474.3		0.173	39913.7
0.174	48131.1			0.174	44686.8		0.174	36949.5
0.175	47537			0.175	44809.4		0.175	33084.7
0.176	48168.4			0.176	48631.5		0.176	33946.6
0.177	48597.1			0.177	44642.3		0.177	31081.4
0.178	48385.8			0.178	48513.6		0.178	33494.9
0.179	47898.3			0.179	47376.2		0.179	35503.6
0.18	47685.8			0.18	48832.5		0.18	34158.6
0.181	46789			0.181	47889.3		0.181	33381.8
0.182	47266.5			0.182	50241.2		0.182	31495.2
0.183	46804.3			0.183	50682.7		0.183	33811.9
0.184	46242.3			0.184	50576.8		0.184	36752.1
0.185	45555			0.185	50039.6		0.185	37130.3
0.186	46261.6			0.186	51833.7		0.186	39410.4
0.187	46011			0.187	49734.4		0.187	38118.7
0.188	46046.5			0.188	49504.1		0.188	39073.7
0.189	45510.4			0.189	47348.7		0.189	41151.4
0.19	44967.3			0.19	46443.1		0.19	38581.5
0.191	44555.8			0.191	47748.2		0.191	39117.6
0.192	44967.5			0.192	48843.2		0.192	39935
0.193	44905.2			0.193	47935.6		0.193	40890.1
0.194	44887.1			0.194	48223		0.194	43027
0.195	44629			0.195	47148.4		0.195	39305.5
0.196	44146.4			0.196	49165.2		0.196	41235.4
0.197	45283.2			0.197	48355.7		0.197	43094
0.198	45339.9			0.198	48270.2		0.198	43808.6
0.199	45458.7			0.199	49480.6		0.199	47406
0.2	45316.7			0.2	51502.2		0.2	46364.6
0.201	45146.1			0.201	50798.2		0.201	51265.1
0.202	45798.5			0.202	50371.4		0.202	50536
0.203	46257.5			0.203	53623.8		0.203	53602.2
0.204	45964			0.204	53209		0.204	53932.3
0.205	46356.9			0.205	55545.2		0.205	53186.3
0.206	46452			0.206	55267.9		0.206	55732.7
0.207	46271.9			0.207	54895.5		0.207	56121.4
0.208	45725.2			0.208	50700.8		0.208	54391
0.209	46147.5			0.209	54347.1		0.209	58004.5
0.21	45917.3			0.21	53865.6		0.21	58680.6
0.211	46168			0.211	55000.4		0.211	60779.7
0.212	46198.8			0.212	56853		0.212	60021.1
0.213	46264			0.213	54907.4		0.213	60693
0.214	46692.1			0.214	57398.9		0.214	62417
0.215	46427.9			0.215	57394.4		0.215	61794.5
0.216	46895			0.216	52497.9		0.216	59645.4
0.217	47589.7			0.217	51921.9		0.217	61916.3
0.218	47387.3			0.218	50119		0.218	56919.6
0.219	46859.8			0.219	48307.6		0.219	61989
0.22	46665.8			0.22	51187.7		0.22	59247.6
0.221	46511.9			0.221	50157.5		0.221	62339.8
0.222	46941.7			0.222	55643.6		0.222	61847.7
0.223	47372.8			0.223	53530		0.223	63016.6
0.224	46708.8			0.224	53448.2		0.224	61124
0.225	46534			0.225	51919.3		0.225	60620.2
0.226	47203.2			0.226	52343.9		0.226	58860.2
0.227	47432.9			0.227	52032.6		0.227	55552.9
0.228	47413.1			0.228	51998.3		0.228	56007.4
0.229	47647.5			0.229	54475.4		0.229	51704.8
0.23	47661.6			0.23	52275.7		0.23	50227.3
0.231	47707			0.231	54148.8		0.231	47840.8
0.232	47644.3			0.232	54668.9		0.232	49006.4
0.233	47865.3			0.233	52449.2		0.233	51610.7
0.234	47764.2			0.234	52077.5		0.234	52847.4
0.235	48437.8			0.235	49435		0.235	51263.7
0.236	48022.7			0.236	50015.6		0.236	52960.6
0.237	47179.2			0.237	53355.9		0.237	57102
0.238	46876.3			0.238	51350.8		0.238	56536.6
0.239	46602.5			0.239	50687.1		0.239	50952
0.24	47687.2			0.24	50173.9		0.24	52601.1
0.241	48014.2			0.241	44904.7		0.241	54731.2
0.242	48710.1			0.242	47576.4		0.242	50410.3
0.243	48714.6			0.243	46700.8		0.243	50203.5
0.244	48391.8			0.244	47284		0.244	50882.2
0.245	48155.1			0.245	50748.3		0.245	46863.4
0.246	47889.2			0.246	50359.7		0.246	49070.3
0.247	47660.6			0.247	50883.6		0.247	43993.8
0.248	47890.1			0.248	49539.8		0.248	46183.1
0.249	48193			0.249	50364.6		0.249	49732.3
0.25	48042			0.25	48494.6		0.25	48389.6
0.251	47736.5			0.251	49554.3		0.251	48299.3
0.252	47529.6			0.252	48234.3		0.252	50067.4
0.253	47738.4			0.253	47133.2		0.253	52390.1
0.254	46113.4			0.254	45700.4		0.254	52462.8
0.255	46869.4			0.255	45069.6		0.255	53583.5
0.256	47358.7			0.256	45385.9		0.256	51903.3
0.257	46592.6			0.257	46806.6		0.257	55706.9
0.258	46242.8			0.258	47017.2		0.258	52413.5
0.259	47731.8			0.259	45930.6		0.259	54285.9
0.26	48262.5			0.26	47901.1		0.26	55466
0.261	49076			0.261	48596.5		0.261	56750
0.262	49286.2			0.262	51000.1		0.262	52047.6
0.263	48789.2			0.263	50888.2		0.263	49524.2
0.264	48527.6			0.264	51013.9		0.264	50584.9
0.265	47771.8			0.265	49523.4		0.265	49833.1
0.266	47085			0.266	49239.4		0.266	49468
0.267	47568			0.267	51223.7		0.267	46421.2
0.268	46647.6			0.268	50734.4		0.268	48531.2
0.269	46184			0.269	49489.2		0.269	48339.1
0.27	46751			0.27	52810		0.27	50353.8
0.271	46224.4			0.271	51109.1		0.271	49806.5
0.272	46928.9			0.272	53722.3		0.272	48803.6
0.273	45878.6			0.273	55434.4		0.273	49208.6
0.274	45243.2			0.274	53057.6		0.274	49839.7
0.275	44152.7			0.275	51907.7		0.275	50446
0.276	44292.3			0.276	51672.2		0.276	50667.1
0.277	44443.8			0.277	54276.2		0.277	54487
0.278	43695.1			0.278	54450.8		0.278	56654.4
0.279	43924			0.279	53513.4		0.279	54451
0.28	43921.9			0.28	51968.6		0.28	57172
0.281	43552.3			0.281	52954.5		0.281	51749.4
0.282	43681			0.282	52810.8		0.282	51129.7
0.283	43564.5			0.283	49914.4		0.283	52336.7
0.284	43772.2			0.284	46974.1		0.284	50300.4
0.285	45195.8			0.285	45662.1		0.285	48907.4
0.286	44702.7			0.286	49172		0.286	51074.3
0.287	43906.8			0.287	50789.1		0.287	48514.4
0.288	44254.6			0.288	49636		0.288	49657.1
0.289	44550.7			0.289	52163.5		0.289	48102.9
0.29	43384.6			0.29	53137.7		0.29	50942.9
0.291	44092.2			0.291	50948.2		0.291	49057
0.292	43804.6			0.292	55448.7		0.292	48345.2
0.293	43455.9			0.293	52826.4		0.293	50354.8
0.294	44707.1			0.294	51628.1		0.294	50600.2
0.295	45417.2			0.295	50022.9		0.295	48039.8
0.296	46544.1			0.296	52852.9		0.296	48429
0.297	46913.4			0.297	50509.4		0.297	51664
0.298	46712.8			0.298	54012.9		0.298	49657.4
0.299	47104.8			0.299	56252.6		0.299	51508.5
0.3	46764.8			0.3	57356.2		0.3	51681.1
