# Supplementary material for: Investigating the Pavement Vibration Response for Roadway Service Condition Evaluation
Source: Hindawi journal article supplement (doi:10.1155/2018/2714657), 2018-01-01
Supplement: f1 [file 2714657.f1.zip › data/Figure11.xlsx]

## Sheet: Sheet3
0.5	8.73688	0.873688		0.5	10.2016	1.02016		0.5	14.3461	1.43461
0.52	8.25878	0.825878		0.52	11.6552	1.16552		0.52	13.7129	1.37129
0.54	8.58627	0.858627		0.54	10.8507	1.08507		0.54	12.7974	1.27974
0.56	9.16883	0.916883		0.56	10.8526	1.08526		0.56	10.7644	1.07644
0.58	8.4134	0.84134		0.58	9.215	0.9215		0.58	9.76499	0.976499
0.6	8.6394	0.86394		0.6	9.45425	0.945425		0.6	11.6925	1.16925
0.62	7.82107	0.782107		0.62	9.30683	0.930683		0.62	11.4808	1.14808
0.64	8.21038	0.821038		0.64	10.7463	1.07463		0.64	11.4837	1.14837
0.66	8.23164	0.823164		0.66	9.83174	0.983174		0.66	11.1446	1.11446
0.68	8.4497	0.84497		0.68	10.8731	1.08731		0.68	10.6891	1.06891
0.7	8.13961	0.813961		0.7	9.90108	0.990108		0.7	10.8589	1.08589
0.72	8.53639	0.853639		0.72	9.31693	0.931693		0.72	11.9475	1.19475
0.74	8.24569	0.824569		0.74	7.38124	0.738124		0.74	11.9197	1.19197
0.76	8.38332	0.838332		0.76	6.49102	0.649102		0.76	12.3921	1.23921
0.78	8.94389	0.894389		0.78	8.23533	0.823533		0.78	13.813	1.3813
0.8	8.10723	0.810723		0.8	9.43504	0.943504		0.8	13.534	1.3534
0.82	8.33092	0.833092		0.82	8.93972	0.893972		0.82	12.6653	1.26653
0.84	8.76429	0.876429		0.84	10.2613	1.02613		0.84	13.2379	1.32379
0.86	9.0691	0.90691		0.86	9.4098	0.94098		0.86	13.7887	1.37887
0.88	8.66228	0.866228		0.88	9.65112	0.965112		0.88	11.1692	1.11692
0.9	8.25002	0.825002		0.9	9.10648	0.910648		0.9	14.7747	1.47747
0.92	7.79467	0.779467		0.92	7.87984	0.787984		0.92	15.8877	1.58877
0.94	8.02844	0.802844		0.94	6.46281	0.646281		0.94	14.6587	1.46587
0.96	7.67108	0.767108		0.96	7.05256	0.705256		0.96	13.6111	1.36111
0.98	8.11067	0.811067		0.98	8.42883	0.842883		0.98	15.9354	1.59354
1	8.39167	0.839167		1	7.94139	0.794139		1	14.9	1.49
1.02	8.52074	0.852074		1.02	10.2268	1.02268		1.02	15.1166	1.51166
1.04	8.5033	0.85033		1.04	9.70619	0.970619		1.04	13.0816	1.30816
1.06	8.41416	0.841416		1.06	8.29669	0.829669		1.06	11.8138	1.18138
1.08	8.27717	0.827717		1.08	9.07516	0.907516		1.08	16.7243	1.67243
1.1	8.17776	0.817776		1.1	9.87698	0.987698		1.1	17.1613	1.71613
1.12	7.53267	0.753267		1.12	9.83603	0.983603		1.12	16.305	1.6305
1.14	8.31538	0.831538		1.14	10.4536	1.04536		1.14	15.148	1.5148
1.16	7.57831	0.757831		1.16	10.2222	1.02222		1.16	12.9417	1.29417
1.18	7.37582	0.737582		1.18	8.94078	0.894078		1.18	14.7242	1.47242
1.2	7.71024	0.771024		1.2	9.35721	0.935721		1.2	15.0114	1.50114
1.22	7.32587	0.732587		1.22	11.1095	1.11095		1.22	13.9342	1.39342
1.24	7.11049	0.711049		1.24	8.8533	0.88533		1.24	13.0497	1.30497
1.26	7.46935	0.746935		1.26	10.1905	1.01905		1.26	13.2479	1.32479
1.28	7.65847	0.765847		1.28	9.70574	0.970574		1.28	16.1496	1.61496
1.3	7.04665	0.704665		1.3	10.403	1.0403		1.3	16.4715	1.64715
1.32	7.8771	0.78771		1.32	12.2094	1.22094		1.32	15.9334	1.59334
1.34	7.9119	0.79119		1.34	8.82427	0.882427		1.34	14.5707	1.45707
1.36	8.29169	0.829169		1.36	9.63145	0.963145		1.36	12.5511	1.25511
1.38	8.54654	0.854654		1.38	10.6935	1.06935		1.38	12.7096	1.27096
1.4	8.82904	0.882904		1.4	10.1191	1.01191		1.4	12.2851	1.22851
1.42	8.81735	0.881735		1.42	10.4118	1.04118		1.42	10.1996	1.01996
1.44	8.31273	0.831273		1.44	12.5259	1.25259		1.44	12.4765	1.24765
1.46	8.06376	0.806376		1.46	11.132	1.1132		1.46	13.8014	1.38014
1.48	7.19388	0.719388		1.48	11.6122	1.16122		1.48	16.912	1.6912
1.5	7.96484	0.796484		1.5	12.6879	1.26879		1.5	15.8646	1.58646
1.52	8.4858	0.84858		1.52	13.2654	1.32654		1.52	17.763	1.7763
1.54	8.80942	0.880942		1.54	11.8835	1.18835		1.54	16.1211	1.61211
1.56	8.50391	0.850391		1.56	12.8407	1.28407		1.56	12.8794	1.28794
1.58	8.69203	0.869203		1.58	11.4255	1.14255		1.58	12.2612	1.22612
1.6	8.68078	0.868078		1.6	13.839	1.3839		1.6	12.6534	1.26534
1.62	9.05688	0.905688		1.62	11.7659	1.17659		1.62	14.4978	1.44978
1.64	8.80794	0.880794		1.64	13.9437	1.39437		1.64	14.6599	1.46599
1.66	8.44878	0.844878		1.66	13.1411	1.31411		1.66	14.9413	1.49413
1.68	8.8158	0.88158		1.68	12.7571	1.27571		1.68	17.3494	1.73494
1.7	8.65544	0.865544		1.7	12.9543	1.29543		1.7	16.5285	1.65285
1.72	7.89741	0.789741		1.72	11.6776	1.16776		1.72	13.81	1.381
1.74	7.9305	0.79305		1.74	11.8313	1.18313		1.74	11.2993	1.12993
1.76	8.21706	0.821706		1.76	12.1564	1.21564		1.76	9.94307	0.994307
1.78	7.80741	0.780741		1.78	11.8121	1.18121		1.78	9.36673	0.936673
1.8	7.80246	0.780246		1.8	10.219	1.0219		1.8	9.09816	0.909816
1.82	7.85548	0.785548		1.82	9.64358	0.964358		1.82	7.79815	0.779815
1.84	7.7072	0.77072		1.84	9.1809	0.91809		1.84	8.80727	0.880727
1.86	7.83171	0.783171		1.86	11.1794	1.11794		1.86	9.72073	0.972073
1.88	7.71735	0.771735		1.88	9.86073	0.986073		1.88	10.8856	1.08856
1.9	7.65625	0.765625		1.9	8.45197	0.845197		1.9	10.3371	1.03371
1.92	7.38872	0.738872		1.92	8.67928	0.867928		1.92	9.73789	0.973789
1.94	7.06503	0.706503		1.94	7.74566	0.774566		1.94	13.3149	1.33149
1.96	7.71725	0.771725		1.96	8.99861	0.899861		1.96	13.1178	1.31178
1.98	7.08105	0.708105		1.98	7.71657	0.771657		1.98	11.9344	1.19344
2	6.90896	0.690896		2	7.94302	0.794302		2	11.5524	1.15524
2.02	7.65398	0.765398		2.02	9.94303	0.994303		2.02	12.1777	1.21777
2.04	7.39434	0.739434		2.04	9.40635	0.940635		2.04	12.0542	1.20542
2.06	7.15485	0.715485		2.06	12.4202	1.24202		2.06	11.1455	1.11455
2.08	7.77855	0.777855		2.08	11.5192	1.15192		2.08	10.7118	1.07118
2.1	7.01077	0.701077		2.1	12.5335	1.25335		2.1	12.4409	1.24409
2.12	7.45171	0.745171		2.12	12.6818	1.26818		2.12	12.9835	1.29835
2.14	7.40947	0.740947		2.14	14.7996	1.47996		2.14	13.3565	1.33565
2.16	7.83979	0.783979		2.16	14.8685	1.48685		2.16	17.3562	1.73562
2.18	7.61139	0.761139		2.18	13.0412	1.30412		2.18	17.5595	1.75595
2.2	7.65373	0.765373		2.2	14.6182	1.46182		2.2	17.5253	1.75253
2.22	8.12669	0.812669		2.22	12.4389	1.24389		2.22	16.1114	1.61114
2.24	8.27258	0.827258		2.24	11.3687	1.13687		2.24	15.1537	1.51537
2.26	7.61115	0.761115		2.26	8.86882	0.886882		2.26	12.5748	1.25748
2.28	7.3609	0.73609		2.28	10.9879	1.09879		2.28	13.7991	1.37991
2.3	7.20776	0.720776		2.3	12.6696	1.26696		2.3	13.1884	1.31884
2.32	7.56801	0.756801		2.32	13.4277	1.34277		2.32	13.5893	1.35893
2.34	7.46357	0.746357		2.34	11.7592	1.17592		2.34	11.5216	1.15216
2.36	8.6905	0.86905		2.36	10.522	1.0522		2.36	12.9782	1.29782
2.38	8.18613	0.818613		2.38	10.8598	1.08598		2.38	16.2888	1.62888
2.4	7.94743	0.794743		2.4	12.3006	1.23006		2.4	17.5631	1.75631
2.42	8.09872	0.809872		2.42	14.2357	1.42357		2.42	15.65	1.565
2.44	8.13087	0.813087		2.44	12.67	1.267		2.44	14.1263	1.41263
2.46	7.61889	0.761889		2.46	11.2195	1.12195		2.46	15.6741	1.56741
2.48	7.35008	0.735008		2.48	9.11871	0.911871		2.48	14.8441	1.48441
2.5	8.04976	0.804976		2.5	9.32076	0.932076		2.5	15.2421	1.52421
2.52	8.98361	0.898361		2.52	9.38812	0.938812		2.52	11.735	1.1735
2.54	8.59733	0.859733		2.54	8.99667	0.899667		2.54	12.5917	1.25917
2.56	8.19415	0.819415		2.56	8.91108	0.891108		2.56	16.0186	1.60186
2.58	8.29609	0.829609		2.58	8.57923	0.857923		2.58	15.9067	1.59067
2.6	7.88216	0.788216		2.6	8.27153	0.827153		2.6	16.2616	1.62616
2.62	8.37849	0.837849		2.62	9.00691	0.900691		2.62	16.6685	1.66685
2.64	7.69101	0.769101		2.64	9.19128	0.919128		2.64	14.958	1.4958
2.66	8.37903	0.837903		2.66	8.87369	0.887369		2.66	13.805	1.3805
2.68	7.54413	0.754413		2.68	9.32381	0.932381		2.68	10.3801	1.03801
2.7	8.12971	0.812971		2.7	10.2659	1.02659		2.7	11.7664	1.17664
2.72	8.4321	0.84321		2.72	12.9347	1.29347		2.72	10.0234	1.00234
2.74	7.78322	0.778322		2.74	11.9213	1.19213		2.74	10.4737	1.04737
2.76	7.38965	0.738965		2.76	11.118	1.1118		2.76	12.9232	1.29232
2.78	7.50638	0.750638		2.78	12.1296	1.21296		2.78	15.9127	1.59127
2.8	7.75992	0.775992		2.8	11.0299	1.10299		2.8	18.1035	1.81035
2.82	7.27955	0.727955		2.82	11.853	1.1853		2.82	18.8365	1.88365
2.84	7.23047	0.723047		2.84	11.6447	1.16447		2.84	16.5058	1.65058
2.86	7.89397	0.789397		2.86	10.7607	1.07607		2.86	13.6127	1.36127
2.88	7.90684	0.790684		2.88	10.8577	1.08577		2.88	13.0045	1.30045
2.9	7.7545	0.77545		2.9	10.778	1.0778		2.9	14.4522	1.44522
2.92	8.02359	0.802359		2.92	12.4331	1.24331		2.92	11.8953	1.18953
2.94	7.68633	0.768633		2.94	10.4784	1.04784		2.94	11.0457	1.10457
2.96	7.96263	0.796263		2.96	12.9956	1.29956		2.96	12.3727	1.23727
2.98	7.37879	0.737879		2.98	9.18939	0.918939		2.98	11.8635	1.18635
