# Supplementary material for: Investigating the Pavement Vibration Response for Roadway Service Condition Evaluation
Source: Hindawi journal article supplement (doi:10.1155/2018/2714657), 2018-01-01
Supplement: f1 [file 2714657.f1.zip › data/Figure13 and Figure15/frequency_domain.xlsx]

## Sheet: asphalt
0	0.00146533			0	0.00146504			0	0.00146516
1.95312	0.000870401			1.95312	0.000841303			1.95312	0.000805175
3.90625	0.000564809			3.90625	0.000460462			3.90625	0.000368141
5.85938	0.00284792			5.85938	0.00251835			5.85938	0.00211752
7.8125	0.00611555			7.8125	0.00551505			7.8125	0.00477659
9.76562	0.00663255			9.76562	0.00571269			9.76562	0.00458775
11.7188	0.00574789			11.7188	0.00441582			11.7188	0.00278669
13.6719	0.00940248			13.6719	0.00785362			13.6719	0.00613352
15.625	0.012901			15.625	0.0107431			15.625	0.00819867
17.5781	0.012521			17.5781	0.00976076			17.5781	0.00647679
19.5312	0.0114612			19.5312	0.00814708			19.5312	0.00425347
21.4844	0.0149111			21.4844	0.0111736			21.4844	0.00699031
23.4375	0.0180327			23.4375	0.0136752			23.4375	0.00875025
25.3906	0.0171057			25.3906	0.0122809			25.3906	0.00709203
27.3438	0.0157947			27.3438	0.0103686			27.3438	0.00452959
29.2969	0.01834			29.2969	0.0125004			29.2969	0.00646054
31.25	0.0196995			31.25	0.0133984			31.25	0.00702171
33.2031	0.0179782			33.2031	0.0112986			33.2031	0.00487278
35.1562	0.0171405			35.1562	0.010077			35.1562	0.00339265
37.1094	0.0180902			37.1094	0.010736			37.1094	0.00394719
39.0625	0.0176965			39.0625	0.01014			39.0625	0.00356253
41.0156	0.0166478			41.0156	0.00887001			41.0156	0.00215293
42.9688	0.0173061			42.9688	0.00952095			42.9688	0.00332242
44.9219	0.0172339			44.9219	0.00933767			44.9219	0.00304354
46.875	0.01559			46.875	0.00778781			46.875	0.00231918
48.8281	0.0146835			48.8281	0.00691577			48.8281	0.00141507
50.7812	0.0149782			50.7812	0.00739756			50.7812	0.00218473
52.7344	0.0137684			52.7344	0.00635271			52.7344	0.00141406
54.6875	0.0118679			54.6875	0.00468485			54.6875	0.000167524
56.6406	0.011738			56.6406	0.00515601			56.6406	0.00207592
58.5938	0.0114199			58.5938	0.00500582			58.5938	0.00123856
60.5469	0.00965865			60.5469	0.00360022			60.5469	7.2186e-05
62.5	0.00830415			62.5	0.00299587			62.5	0.00164544
64.4531	0.00803944			64.4531	0.00314433			64.4531	0.00129018
66.4062	0.00723006			66.4062	0.0026712			66.4062	0.000429802
68.3594	0.00586109			68.3594	0.00189646			68.3594	0.00058912
70.3125	0.00542877			70.3125	0.00250184			70.3125	0.00180517
72.2656	0.00427818			72.2656	0.00143597			72.2656	0.000271797
74.2188	0.00253378			74.2188	0.000629106			74.2188	0.00125879
76.1719	0.00162394			76.1719	0.00102614			76.1719	0.00158493
78.125	0.0016767			78.125	0.0010616			78.125	0.00110592
80.0781	0.000528674			80.0781	0.000524338			80.0781	0.000897482
82.0312	0.000918786			82.0312	0.000931961			82.0312	0.00122901
83.9844	0.00192649			83.9844	0.00130216			83.9844	0.00120175
85.9375	0.00174466			85.9375	0.000618833			85.9375	0.000459146
87.8906	0.0027188			87.8906	0.00116364			87.8906	0.00100885
89.8438	0.00383636			89.8438	0.00184887			89.8438	0.00144714
91.7969	0.00349966			91.7969	0.00130437			91.7969	0.000907679
93.75	0.00309574			93.75	0.000281445			93.75	0.000278598
95.7031	0.00411726			95.7031	0.00104277			95.7031	0.000501262
97.6562	0.00460407			97.6562	0.0014693			97.6562	0.0010111
99.6094	0.00388912			99.6094	0.000186838			99.6094	0.000438164
101.562	0.00430402			101.562	0.000632252			101.562	0.000693656
103.516	0.00544082			103.516	0.0014495			103.516	0.000853721
105.469	0.0056594			105.469	0.00158953			105.469	0.00101871
107.422	0.00547004			107.422	0.00134743			107.422	0.000932002
109.375	0.00571581			109.375	0.00155474			109.375	0.00109412
111.328	0.00543289			111.328	0.00137928			111.328	0.000901408
113.281	0.00463464			113.281	0.000617278			113.281	0.000164759
115.234	0.00473078			115.234	0.000839596			115.234	0.000475742
117.188	0.00498146			117.188	0.00133772			117.188	0.000957826
119.141	0.00410132			119.141	0.000726952			119.141	0.000416476
121.094	0.00336333			121.094	0.000133464			121.094	0.000258393
123.047	0.00362744			123.047	0.000741614			123.047	0.000452662
125	0.00344643			125	0.00113567			125	0.00093162
126.953	0.0024903			126.953	0.000567675			126.953	0.000501569
128.906	0.00237506			128.906	0.000567132			128.906	0.00037619
130.859	0.00245596			130.859	0.0011258			130.859	0.000945728
132.812	0.00137684			132.812	0.00066132			132.812	0.000641257
134.766	0.000551294			134.766	0.000301755			134.766	0.000486838
136.719	0.00105886			136.719	0.000785381			136.719	0.000617581
138.672	0.00103815			138.672	0.00111266			138.672	0.000978637
140.625	0.000658327			140.625	0.000389469			140.625	0.000521654
142.578	0.00101274			142.578	0.000185638			142.578	0.000423852
144.531	0.000990882			144.531	0.000255315			144.531	0.000143793
146.484	0.00171905			146.484	0.000153145			146.484	0.000402083
148.438	0.00224895			148.438	0.00065559			148.438	0.000769001
150.391	0.00193261			150.391	0.000876392			150.391	0.000738353
152.344	0.00214444			152.344	0.000842923			152.344	0.000675129
154.297	0.00291923			154.297	0.000866217			154.297	0.000844177
156.25	0.00266815			156.25	0.000858243			156.25	0.000682258
158.203	0.00213697			158.203	0.00109854			158.203	0.000848506
160.156	0.00268006			160.156	0.000729114			160.156	0.000477663
162.109	0.00317672			162.109	0.000923203			162.109	0.00073557
164.062	0.00291255			164.062	0.00122756			164.062	0.00100091
166.016	0.00306454			166.016	0.000834314			166.016	0.000607843
167.969	0.00364826			167.969	0.000653655			167.969	0.000533117
169.922	0.00335516			169.922	0.000912308			169.922	0.000720566
171.875	0.00276219			171.875	0.000982548			171.875	0.000795139
173.828	0.00286966			173.828	0.000579563			173.828	0.000422716
175.781	0.00283346			175.781	0.00066437			175.781	0.000491296
177.734	0.00241547			177.734	0.00109128			177.734	0.000945223
179.688	0.00250194			179.688	0.0010453			179.688	0.00087384
181.641	0.00269127			181.641	0.00119006			181.641	0.000987295
183.594	0.00219903			183.594	0.00148148			183.594	0.00132157
185.547	0.00173368			185.547	0.00142088			185.547	0.00129758
187.5	0.00185091			187.5	0.00104889			187.5	0.000827913
189.453	0.00191713			189.453	0.0012218			189.453	0.000973789
191.406	0.00148015			191.406	0.00109964			191.406	0.00085347
193.359	0.00114391			193.359	0.00093971			193.359	0.000718091
195.312	0.00107136			195.312	0.00121704			195.312	0.00107275
197.266	0.000847434			197.266	0.000982187			197.266	0.000822449
199.219	0.00102987			199.219	0.000484695			199.219	0.00035366
201.172	0.00129545			201.172	0.000292159			201.172	0.000447899
203.125	0.00201387			203.125	0.000117097			203.125	0.000188568
205.078	0.0027705			205.078	0.000490027			205.078	0.000163957
207.031	0.00275769			207.031	0.000361312			207.031	0.000433307
208.984	0.00287057			208.984	0.000688815			208.984	0.000906343
210.938	0.00377886			210.938	0.00102229			210.938	0.000939796
212.891	0.00436942			212.891	0.00106002			212.891	0.000798993
214.844	0.0044623			214.844	0.000774449			214.844	0.000667104
216.797	0.00503339			216.797	0.0011284			216.797	0.000744476
218.75	0.00571511			218.75	0.00160367			218.75	0.000886936
220.703	0.00569179			220.703	0.00136361			220.703	0.00056256
222.656	0.00574134			222.656	0.00131571			222.656	0.000452266
224.609	0.00633876			224.609	0.00191324			224.609	0.000653454
226.562	0.00654276			226.562	0.00213397			226.562	0.000622538
228.516	0.00631034			228.516	0.00200123			228.516	0.00036673
230.469	0.00658962			230.469	0.00244635			230.469	0.000813997
232.422	0.00706175			232.422	0.00312018			232.422	0.00144198
234.375	0.00688038			234.375	0.00318903			234.375	0.00146618
236.328	0.00662354			236.328	0.00325022			236.328	0.00158531
238.281	0.0068119			238.281	0.00372403			238.281	0.0020736
240.234	0.00682572			240.234	0.00408584			240.234	0.00251775
242.188	0.00623672			242.188	0.00389821			242.188	0.002464
244.141	0.00538371			244.141	0.00344381			244.141	0.00219819
246.094	0.00433328			246.094	0.00289352			246.094	0.00191848
248.047	0.00307936			248.047	0.00236126			248.047	0.00162876
250	0.00256623			250	0.00242551			250	0.00176128
251.953	0.00328225			251.953	0.0029987			251.953	0.00217316
253.906	0.00448753			253.906	0.00380804			253.906	0.00278107
255.859	0.00536622			255.859	0.00429871			255.859	0.00313641
257.812	0.00549152			257.812	0.00404204			257.812	0.00278216
259.766	0.00538154			259.766	0.00358422			259.766	0.00225524
261.719	0.00552537			261.719	0.00343096			261.719	0.00206395
263.672	0.00559029			263.672	0.00322029			263.672	0.00183316
265.625	0.00531132			265.625	0.00269229			265.625	0.00129575
267.578	0.00521352			267.578	0.00247582			267.578	0.00123608
269.531	0.00546046			269.531	0.00266534			269.531	0.00156284
271.484	0.00543443			271.484	0.0024875			271.484	0.0013649
273.438	0.00516265			273.438	0.00222678			273.438	0.00126744
275.391	0.00507125			275.391	0.00234741			275.391	0.00163459
277.344	0.00490789			277.344	0.00215467			277.344	0.00142544
279.297	0.00450433			279.297	0.00166442			279.297	0.000876222
281.25	0.00411192			281.25	0.00149231			281.25	0.000883639
283.203	0.00375333			283.203	0.00141508			283.203	0.000956513
285.156	0.00314857			285.156	0.000909439			285.156	0.000600741
287.109	0.00255705			287.109	0.000777134			287.109	0.000772617
289.062	0.00240983			289.062	0.00121787			289.062	0.00113745
291.016	0.00228749			291.016	0.00116967			291.016	0.000990582
292.969	0.00196465			292.969	0.000890523			292.969	0.00068957
294.922	0.00183043			294.922	0.000987885			294.922	0.000728104
296.875	0.00176542			296.875	0.000917998			296.875	0.000532975
298.828	0.00153036			298.828	0.000652024			298.828	0.000233332
300.781	0.00139362			300.781	0.000747976			300.781	0.000316491
302.734	0.00167915			302.734	0.0012371			302.734	0.000826791
304.688	0.00167282			304.688	0.00127341			304.688	0.000856237
306.641	0.00153263			306.641	0.00117384			306.641	0.000762077
308.594	0.00183866			308.594	0.00147766			308.594	0.00108138
310.547	0.00200227			310.547	0.00162692			310.547	0.0012397
312.5	0.00185151			312.5	0.00143496			312.5	0.00105615
314.453	0.00222066			314.453	0.00167972			314.453	0.00134249
316.406	0.0027365			316.406	0.00213905			316.406	0.00183121
318.359	0.00256908			318.359	0.0019781			318.359	0.00167192
320.312	0.00236141			320.312	0.00173677			320.312	0.00144711
322.266	0.00261428			322.266	0.00193176			322.266	0.00167817
324.219	0.00250871			324.219	0.00186244			324.219	0.00161336
326.172	0.00198747			326.172	0.00141142			326.172	0.00115334
328.125	0.00192958			328.125	0.0012873			328.125	0.00106867
330.078	0.00205636			330.078	0.00137628			330.078	0.00120402
332.031	0.00167973			332.031	0.00103617			332.031	0.000867828
333.984	0.00138163			333.984	0.000693662			333.984	0.000558382
335.938	0.00148296			335.938	0.000824945			335.938	0.000746552
337.891	0.00133277			337.891	0.000924563			337.891	0.000820092
339.844	0.000957063			339.844	0.000763215			339.844	0.000626492
341.797	0.000879601			341.797	0.00050054			341.797	0.000454935
343.75	0.000743811			343.75	0.000266344			343.75	0.000317946
345.703	0.000397349			345.703	0.00039199			345.703	0.000252248
347.656	0.000756614			347.656	0.000773364			347.656	0.000678108
349.609	0.000879014			349.609	0.000833656			349.609	0.000741896

## Sheet: concrete
0	0.00180238			0	0.00179883			0	0.00177529
1.95312	0.000896713			1.95312	0.000892747			1.95312	0.000870272
3.90625	0.000951631			3.90625	0.000955362			3.90625	0.000939175
5.85938	0.00149134			5.85938	0.00147586			5.85938	0.00144432
7.8125	0.00259227			7.8125	0.00255615			7.8125	0.00250627
9.76562	0.00127099			9.76562	0.00123243			9.76562	0.00119241
11.7188	0.000836846			11.7188	0.000895568			11.7188	0.000924019
13.6719	0.00289733			13.6719	0.00288258			13.6719	0.00285593
15.625	0.00255754			15.625	0.00247941			15.625	0.00242686
17.5781	0.000871941			17.5781	0.00071772			17.5781	0.00061069
19.5312	0.000418663			19.5312	0.000511034			19.5312	0.000620842
21.4844	0.00108771			21.4844	0.00102831			21.4844	0.00101701
23.4375	0.00141008			23.4375	0.00112162			23.4375	0.000922785
25.3906	0.00175246			25.3906	0.00145838			25.3906	0.00127456
27.3438	0.0009832			27.3438	0.000641357			27.3438	0.000480005
29.2969	0.000812645			29.2969	0.000415926			29.2969	0.000258083
31.25	0.00157214			31.25	0.00110907			31.25	0.000800771
33.2031	0.00180638			33.2031	0.0013583			33.2031	0.00111401
35.1562	0.000682717			35.1562	0.000426772			35.1562	0.000597468
37.1094	0.000634034			37.1094	0.000800869			37.1094	0.00109855
39.0625	0.00117499			39.0625	0.000843242			39.0625	0.000815962
41.0156	0.000992407			41.0156	0.000333361			41.0156	5.8824e-05
42.9688	0.000596506			42.9688	0.000227211			42.9688	0.000555552
44.9219	0.00134719			44.9219	0.000884684			44.9219	0.000797778
46.875	0.00198942			46.875	0.00142801			46.875	0.00118158
48.8281	0.000999785			48.8281	0.000299913			48.8281	0.000169391
50.7812	0.000418136			50.7812	0.000333304			50.7812	0.000712068
52.7344	0.00108559			52.7344	0.000512637			52.7344	0.000435491
54.6875	0.00108843			54.6875	0.000471966			54.6875	0.000323329
56.6406	0.000219309			56.6406	0.000593408			56.6406	0.000887877
58.5938	0.000332544			58.5938	0.000668909			58.5938	0.000957856
60.5469	0.000729172			60.5469	0.00027413			60.5469	0.000375967
62.5	0.000347221			62.5	0.000266665			62.5	0.000494683
64.4531	0.00025341			64.4531	0.000666531			64.4531	0.000886102
66.4062	0.000574126			66.4062	7.56755e-05			66.4062	0.000172335
68.3594	0.00102124			68.3594	0.000701593			68.3594	0.000634665
70.3125	0.000468286			70.3125	0.000546025			70.3125	0.000621336
72.2656	0.000300368			72.2656	0.000509737			72.2656	0.000637178
74.2188	0.000665046			74.2188	0.00054529			74.2188	0.000536137
76.1719	0.000368266			76.1719	0.000368138			76.1719	0.000383726
78.125	0.000630298			78.125	0.000747018			78.125	0.000790934
80.0781	0.000494163			80.0781	0.000539329			80.0781	0.000591112
82.0312	0.000488392			82.0312	0.000508			82.0312	0.000481432
83.9844	0.000404363			83.9844	0.000434636			83.9844	0.000434981
85.9375	0.000802557			85.9375	0.000746652			85.9375	0.000759097
87.8906	0.00058606			87.8906	0.000444201			87.8906	0.000468319
89.8438	0.000581972			89.8438	0.000328297			89.8438	0.000315596
91.7969	0.0007486			91.7969	0.000434321			91.7969	0.000379284
93.75	0.000772871			93.75	0.000412863			93.75	0.000334784
95.7031	0.00105334			95.7031	0.000779294			95.7031	0.00073271
97.6562	0.000791674			97.6562	0.000397317			97.6562	0.000374407
99.6094	0.000367876			99.6094	0.000177179			99.6094	0.000265542
101.562	0.00039782			101.562	0.000432504			101.562	0.000472224
103.516	0.000696955			103.516	0.000150221			103.516	0.000106966
105.469	0.00130091			105.469	0.000917137			105.469	0.000886105
107.422	0.00140817			107.422	0.00111923			107.422	0.00111303
109.375	0.000902174			109.375	0.00046236			109.375	0.000486015
111.328	0.000804546			111.328	0.000255772			111.328	0.000253598
113.281	0.000910325			113.281	0.000484485			113.281	0.000459842
115.234	0.000998802			115.234	0.000443373			115.234	0.000404843
117.188	0.000983679			117.188	0.000377665			117.188	0.000342128
119.141	0.000651383			119.141	0.000170517			119.141	0.000168642
121.094	0.000522692			121.094	0.00012799			121.094	0.000145566
123.047	0.000885994			123.047	0.000400723			123.047	0.000333259
125	0.00097975			125	0.000541517			125	0.000508082
126.953	0.000717119			126.953	0.000317997			126.953	0.000301651
128.906	0.000834368			128.906	0.000488352			128.906	0.000436601
130.859	0.000978411			130.859	0.000703312			130.859	0.000648519
132.812	0.000551663			132.812	0.000388409			132.812	0.000365595
134.766	0.000315688			134.766	0.000277296			134.766	0.000293418
136.719	0.000635203			136.719	0.000567406			136.719	0.000516536
138.672	0.000774199			138.672	0.000779752			138.672	0.000739179
140.625	0.000246015			140.625	0.000314803			140.625	0.00030466
142.578	0.000521953			142.578	0.000483403			142.578	0.000517229
144.531	0.00041929			144.531	0.000379654			144.531	0.00039036
146.484	0.000509351			146.484	0.000278351			146.484	0.000284767
148.438	0.000907956			148.438	0.000545096			148.438	0.000555253
150.391	0.000988877			150.391	0.000550041			150.391	0.000583095
152.344	0.00109618			152.344	0.00063804			152.344	0.000688079
154.297	0.00120862			154.297	0.000661176			154.297	0.000692511
156.25	0.000925234			156.25	0.000324814			156.25	0.000324325
158.203	0.000621228			158.203	0.000514981			158.203	0.000457864
160.156	0.000758306			160.156	0.000620795			160.156	0.000598475
162.109	0.00102873			162.109	0.000404648			162.109	0.000414904
164.062	0.00118705			164.062	0.000478903			164.062	0.000463361
166.016	0.00104665			166.016	0.000389506			166.016	0.000384441
167.969	0.000936465			167.969	0.000180585			167.969	0.000215256
169.922	0.00100676			169.922	0.00027697			169.922	0.000275025
171.875	0.000935496			171.875	0.000274561			171.875	0.000228854
173.828	0.00078868			173.828	0.000499964			173.828	0.000450218
175.781	0.000553009			175.781	0.000379049			175.781	0.000367131
177.734	0.000800266			177.734	0.000257096			177.734	0.000218076
179.688	0.00128068			179.688	0.000749507			179.688	0.000698829
181.641	0.0013264			181.641	0.000868936			181.641	0.000853573
183.594	0.00115307			183.594	0.000780998			183.594	0.000760973
185.547	0.00124572			185.547	0.000931434			185.547	0.00086694
187.5	0.0011844			187.5	0.000911067			187.5	0.000859189
189.453	0.000762861			189.453	0.000566967			189.453	0.000581226
191.406	0.000621663			191.406	0.000557405			191.406	0.000556097
193.359	0.000635571			193.359	0.000657968			193.359	0.000671342
195.312	0.000502601			195.312	0.000610621			195.312	0.000683151
197.266	0.000534556			197.266	0.000563773			197.266	0.000608152
199.219	0.000516746			199.219	0.000379288			199.219	0.00040834
201.172	0.000687169			201.172	0.000270864			201.172	0.000238237
203.125	0.00119669			203.125	0.000692917			203.125	0.00057671
205.078	0.00121694			205.078	0.000602894			205.078	0.00048656
207.031	0.000719791			207.031	2.73518e-05			207.031	0.000120673
208.984	0.000496554			208.984	0.00032304			208.984	0.000470363
210.938	0.000716038			210.938	0.000294156			210.938	0.000447705
212.891	0.000784162			212.891	0.000365311			212.891	0.000522748
214.844	0.000768085			214.844	0.000438839			214.844	0.000588958
216.797	0.00107911			216.797	0.000507288			216.797	0.000569129
218.75	0.00127267			218.75	0.00057222			218.75	0.000615857
220.703	0.00106514			220.703	0.000350177			220.703	0.000551242
222.656	0.00111107			222.656	0.000213287			222.656	0.000414545
224.609	0.00150984			224.609	0.000459516			224.609	0.000294987
226.562	0.00160769			226.562	0.000486729			226.562	0.000212788
228.516	0.00138475			228.516	0.000278914			228.516	0.000138188
230.469	0.00124841			230.469	0.000183619			230.469	0.000122434
232.422	0.00135737			232.422	0.000450497			232.422	0.000275222
234.375	0.00147003			234.375	0.000547552			234.375	0.000235997
236.328	0.00170053			236.328	0.000944642			236.328	0.000744704
238.281	0.00164732			238.281	0.000955651			238.281	0.000787658
240.234	0.00132983			240.234	0.000711645			240.234	0.000512059
242.188	0.000926691			242.188	0.000434454			242.188	0.000276764
244.141	0.000522163			244.141	0.00022126			244.141	0.000168288
246.094	0.000129408			246.094	0.000160108			246.094	0.000177169
248.047	0.0001065			248.047	0.000222598			248.047	0.000239018
250	0.000338805			250	0.000339296			250	0.000286048
251.953	0.000735001			251.953	0.000650099			251.953	0.000576535
253.906	0.0010351			253.906	0.000845174			253.906	0.000777833
255.859	0.0011855			255.859	0.000907161			255.859	0.000820896
257.812	0.0013646			257.812	0.000940832			257.812	0.000750609
259.766	0.00170717			259.766	0.00110189			259.766	0.000800242
261.719	0.00181795			261.719	0.00109576			261.719	0.000788725
263.672	0.00157609			263.672	0.000765088			263.672	0.000454291
265.625	0.00143359			265.625	0.000523946			265.625	0.000169383
267.578	0.00138513			267.578	0.000390657			267.578	0.000161539
269.531	0.00117492			269.531	0.000347729			269.531	0.000476532
271.484	0.00112904			271.484	0.000692788			271.484	0.000831902
273.438	0.00122325			273.438	0.000812539			273.438	0.000951479
275.391	0.00108175			275.391	0.000741365			275.391	0.000964269
277.344	0.000934966			277.344	0.000776481			277.344	0.000981338
279.297	0.0012152			279.297	0.000797108			279.297	0.000838541
281.25	0.00150157			281.25	0.000776533			281.25	0.000662053
283.203	0.00122499			283.203	0.000370139			283.203	0.000349574
285.156	0.000857934			285.156	0.00015713			285.156	0.000419163
287.109	0.000850085			287.109	0.000136835			287.109	0.000431128
289.062	0.000805763			289.062	0.000119808			289.062	0.000404539
291.016	0.000461509			291.016	0.000397898			291.016	0.000617136
292.969	0.000265502			292.969	0.000424201			292.969	0.000591283
294.922	0.000713436			294.922	0.000291863			294.922	0.000189136
296.875	0.00104662			296.875	0.000557647			296.875	0.000329129
298.828	0.000993707			298.828	0.000579356			298.828	0.000420545
300.781	0.000998241			300.781	0.000686302			300.781	0.000474441
302.734	0.00106643			302.734	0.000809056			302.734	0.000588716
304.688	0.00083829			304.688	0.000606308			304.688	0.000492705
306.641	0.000920867			306.641	0.000673383			306.641	0.000560852
308.594	0.00138004			308.594	0.00106648			308.594	0.000880843
310.547	0.001414			310.547	0.00105393			310.547	0.00090349
312.5	0.00112019			312.5	0.000720695			312.5	0.000699322
314.453	0.00143042			314.453	0.00100499			314.453	0.000991934
316.406	0.00189367			316.406	0.00140595			316.406	0.00139171
318.359	0.00182094			318.359	0.00129376			318.359	0.00135502
320.312	0.001658			320.312	0.00109577			320.312	0.00116042
322.266	0.00189227			322.266	0.00127291			322.266	0.00126909
324.219	0.00193591			324.219	0.00127891			324.219	0.00128482
326.172	0.0015142			326.172	0.00084241			326.172	0.000896905
328.125	0.00136649			328.125	0.000684771			328.125	0.000713745
330.078	0.00154461			330.078	0.000854171			330.078	0.000851515
332.031	0.00126426			332.031	0.000592859			332.031	0.000672626
333.984	0.000763468			333.984	0.00011409			333.984	0.000264282
335.938	0.000917993			335.938	0.000290406			335.938	0.000360634
337.891	0.00132712			337.891	0.000728916			337.891	0.000768276
339.844	0.00113682			339.844	0.000592683			339.844	0.000705612
341.797	0.00067514			341.797	0.000193874			341.797	0.000364245
343.75	0.000496805			343.75	0.000234943			343.75	0.000248684
345.703	0.000289311			345.703	0.00046923			345.703	0.0004279
347.656	0.000730123			347.656	0.00101887			347.656	0.000862976
349.609	0.00107079			349.609	0.00127791			349.609	0.00106389

## Sheet: asphalt_damage
0	0.000417539		0	0.000394018		0	0.000444988
1.95312	0.00166605		1.95312	0.00162555		1.95312	0.00170933
3.90625	0.00230402		3.90625	0.00218599		3.90625	0.00242696
5.85938	0.00143008		5.85938	0.00118405		5.85938	0.00167396
7.8125	0.00548918		7.8125	0.0050319		7.8125	0.00594749
9.76562	0.00812001		9.76562	0.00734562		9.76562	0.0088952
11.7188	0.00517503		11.7188	0.00410487		11.7188	0.00624693
13.6719	0.00853471		13.6719	0.00760396		13.6719	0.00960127
15.625	0.0135596		15.625	0.0118741		15.625	0.0153274
17.5781	0.0122389		17.5781	0.00989915		17.5781	0.0146512
19.5312	0.00835379		19.5312	0.00553608		19.5312	0.0112972
21.4844	0.0130188		21.4844	0.00997903		21.4844	0.0163772
23.4375	0.0167064		23.4375	0.0129216		23.4375	0.0208137
25.3906	0.0134539		25.3906	0.00947252		25.3906	0.0179983
27.3438	0.010523		27.3438	0.0058154		27.3438	0.0158656
29.2969	0.0149947		29.2969	0.00999763		29.2969	0.0208603
31.25	0.0155724		31.25	0.0102283		31.25	0.0219661
33.2031	0.0114783		33.2031	0.00587248		33.2031	0.0184399
35.1562	0.01152		35.1562	0.0056687		35.1562	0.0190124
37.1094	0.0131201		37.1094	0.006908		37.1094	0.0210685
39.0625	0.0111948		39.0625	0.00511162		39.0625	0.0194435
41.0156	0.00977282		41.0156	0.00348823		41.0156	0.0184578
42.9688	0.0117368		42.9688	0.00560962		42.9688	0.0205577
44.9219	0.0109835		44.9219	0.00478248		44.9219	0.0200058
46.875	0.00843635		46.875	0.00240751		46.875	0.0176353
48.8281	0.0089049		48.8281	0.00332471		48.8281	0.0180232
50.7812	0.00924023		50.7812	0.00351625		50.7812	0.0183253
52.7344	0.00707686		52.7344	0.00163914		52.7344	0.0160795
54.6875	0.00613744		54.6875	0.00156504		54.6875	0.0148679
56.6406	0.00723173		56.6406	0.00307177		56.6406	0.0154499
58.5938	0.0059503		58.5938	0.00149273		58.5938	0.0140161
60.5469	0.00442066		60.5469	0.00126522		60.5469	0.0119988
62.5	0.00506842		62.5	0.00265135		62.5	0.0117643
64.4531	0.00423764		64.4531	0.00117796		64.4531	0.0107215
66.4062	0.00280514		66.4062	0.000316822		66.4062	0.00879963
68.3594	0.00356014		68.3594	0.00207799		68.3594	0.00842631
70.3125	0.00369627		70.3125	0.00213001		70.3125	0.00791084
72.2656	0.00135112		72.2656	0.000654585		72.2656	0.00521884
74.2188	0.000889975		74.2188	0.00165839		74.2188	0.00340684
76.1719	0.00187745		76.1719	0.00176729		76.1719	0.00349509
78.125	0.000813857		78.125	0.00112558		78.125	0.00194439
80.0781	0.00110638		80.0781	0.00170197		80.0781	0.000856254
82.0312	0.00135948		82.0312	0.00137117		82.0312	0.00173995
83.9844	0.0010048		83.9844	0.000903421		83.9844	0.00183458
85.9375	0.00173449		85.9375	0.00167402		85.9375	0.00320813
87.8906	0.00222826		87.8906	0.00189448		87.8906	0.00426084
89.8438	0.00181247		89.8438	0.00135701		89.8438	0.00430232
91.7969	0.00150531		91.7969	0.000964187		91.7969	0.00481297
93.75	0.00176906		93.75	0.00119995		93.75	0.00538467
95.7031	0.0018077		95.7031	0.00146378		95.7031	0.00532502
97.6562	0.00110839		97.6562	0.000463729		97.6562	0.00577573
99.6094	0.00134442		99.6094	0.000611574		99.6094	0.00653321
101.562	0.00109878		101.562	0.000629743		101.562	0.00626386
103.516	0.00124238		103.516	0.000541525		103.516	0.00683427
105.469	0.00261716		105.469	0.00192197		105.469	0.00847553
107.422	0.0025764		107.422	0.00188985		107.422	0.00844629
109.375	0.00156959		109.375	0.000931052		109.375	0.00741055
111.328	0.00170982		111.328	0.00110032		111.328	0.00762168
113.281	0.00200381		113.281	0.0014313		113.281	0.00765548
115.234	0.00154308		115.234	0.00112848		115.234	0.00667012
117.188	0.0011777		117.188	0.000686963		117.188	0.00643485
119.141	0.00148131		119.141	0.00101121		119.141	0.00646835
121.094	0.00120866		121.094	0.000966923		121.094	0.00526198
123.047	0.000898291		123.047	0.000812865		123.047	0.00444824
125	0.00114207		125	0.000810372		125	0.00470948
126.953	0.00150217		126.953	0.00129043		126.953	0.00409857
128.906	0.00131291		128.906	0.00127202		128.906	0.00296408
130.859	0.000856363		130.859	0.000682073		130.859	0.00271579
132.812	0.00101444		132.812	0.000869399		132.812	0.00220751
134.766	0.001182		134.766	0.00128863		134.766	0.00118115
136.719	0.000677047		136.719	0.000697486		136.719	0.000833592
138.672	0.001094		138.672	0.000815648		138.672	0.00106007
140.625	0.000831116		140.625	0.000850798		140.625	0.00109383
142.578	0.000544439		142.578	0.000914835		142.578	0.00176913
144.531	0.00040324		144.531	0.000368034		144.531	0.00153287
146.484	0.000444292		146.484	0.000193814		146.484	0.00191808
148.438	0.000585077		148.438	0.0006661		148.438	0.0027652
150.391	0.00147235		150.391	0.00126047		150.391	0.00261371
152.344	0.00175249		152.344	0.00141643		152.344	0.00248418
154.297	0.00120863		154.297	0.000916626		154.297	0.00333816
156.25	0.00139169		156.25	0.00102663		156.25	0.00342258
158.203	0.00201111		158.203	0.00156071		158.203	0.00278475
160.156	0.00171825		160.156	0.00127936		160.156	0.00326708
162.109	0.00152537		162.109	0.00111985		162.109	0.00389496
164.062	0.00209413		164.062	0.00170057		164.062	0.00362132
166.016	0.00181865		166.016	0.00142879		166.016	0.00367334
167.969	0.00125399		167.969	0.000905291		167.969	0.00432536
169.922	0.00165932		169.922	0.00133337		169.922	0.00404576
171.875	0.00189302		171.875	0.00159098		171.875	0.00335033
173.828	0.00148263		173.828	0.00123833		173.828	0.00340166
175.781	0.0015893		175.781	0.00136434		175.781	0.00319665
177.734	0.00209688		177.734	0.00191186		177.734	0.00255162
179.688	0.00189798		179.688	0.00173349		179.688	0.00249594
181.641	0.00198425		181.641	0.00181446		181.641	0.00256529
183.594	0.00258448		183.594	0.00246045		183.594	0.00205292
185.547	0.00244073		185.547	0.00235057		185.547	0.00162896
187.5	0.0018433		187.5	0.00169208		187.5	0.0018118
189.453	0.0020014		189.453	0.0018093		189.453	0.00208548
191.406	0.00185112		191.406	0.00164752		191.406	0.00190308
193.359	0.00145507		193.359	0.0012239		193.359	0.00165703
195.312	0.00168719		195.312	0.00150376		195.312	0.00187309
197.266	0.00148666		197.266	0.00128442		197.266	0.00218577
199.219	0.000807535		199.219	0.000671403		199.219	0.0023035
201.172	0.000547339		201.172	0.000639891		201.172	0.00277801
203.125	0.000864372		203.125	0.000438499		203.125	0.00411216
205.078	0.000996849		205.078	0.000258195		205.078	0.00503996
207.031	0.0006738		207.031	0.000784954		207.031	0.00524013
208.984	0.00136237		208.984	0.00127854		208.984	0.00626145
210.938	0.00204136		210.938	0.00125999		210.938	0.00773878
212.891	0.00190926		212.891	0.000983464		212.891	0.00835747
214.844	0.00210542		214.844	0.00124704		214.844	0.00907812
216.797	0.00305906		216.797	0.00138347		216.797	0.0105627
218.75	0.00324406		218.75	0.00106728		218.75	0.0113297
220.703	0.00290617		220.703	0.00139638		220.703	0.0114272
222.656	0.00358307		222.656	0.00177817		222.656	0.0123873
224.609	0.00427686		224.609	0.0014853		224.609	0.0134265
226.562	0.00401251		226.562	0.00139542		226.562	0.0133901
228.516	0.00418973		228.516	0.00206336		228.516	0.0135339
230.469	0.0052814		230.469	0.00249892		230.469	0.0143537
232.422	0.00548263		232.422	0.00202539		232.422	0.01418
234.375	0.00520075		234.375	0.00196577		234.375	0.0131016
236.328	0.00579549		236.328	0.00301413		236.328	0.0125132
238.281	0.00629028		238.281	0.00326154		238.281	0.0119366
240.234	0.00593567		240.234	0.00306908		240.234	0.010544
242.188	0.00583564		242.188	0.00386379		242.188	0.00953938
244.141	0.00702416		244.141	0.0054931		244.141	0.00992902
246.094	0.00666658		246.094	0.00478732		246.094	0.00901692
248.047	0.00585282		248.047	0.00387457		248.047	0.00741338
250	0.00259687		250	0.00361123		250	0.00305886
251.953	0.0123147		251.953	0.0137688		251.953	0.0119139
253.906	0.0184116		253.906	0.0191293		253.906	0.0185924
255.859	0.0178419		255.859	0.0176129		255.859	0.0189262
257.812	0.0132898		257.812	0.0122457		257.812	0.0152935
259.766	0.00969766		259.766	0.00796852		259.766	0.0126902
261.719	0.00870843		261.719	0.00637506		261.719	0.0128449
263.672	0.00775077		263.672	0.00496179		263.672	0.0131427
265.625	0.00653596		265.625	0.00346757		265.625	0.0131562
267.578	0.00640779		267.578	0.0031647		267.578	0.0138313
269.531	0.00642123		269.531	0.00306213		269.531	0.0141933
271.484	0.00577635		271.484	0.00240342		271.484	0.0136087
273.438	0.00556038		273.438	0.00211526		273.438	0.01318
275.391	0.00550563		275.391	0.00224609		275.391	0.0127299
277.344	0.00459736		277.344	0.00169911		277.344	0.011394
279.297	0.00392327		279.297	0.00124042		279.297	0.0102675
281.25	0.00403231		281.25	0.00160124		281.25	0.00986301
283.203	0.0034071		283.203	0.00138849		283.203	0.00871936
285.156	0.00228155		285.156	0.00088113		285.156	0.00707439
287.109	0.00240088		287.109	0.00125635		287.109	0.00660396
289.062	0.00286773		289.062	0.00184456		289.062	0.00650692
291.016	0.00220586		291.016	0.00142205		291.016	0.00537412
292.969	0.00176414		292.969	0.00109654		292.969	0.00452643
294.922	0.00226196		294.922	0.00149476		294.922	0.00465409
296.875	0.00205171		296.875	0.00126688		296.875	0.00412279
298.828	0.00135136		298.828	0.000591448		298.828	0.00308237
300.781	0.00173287		300.781	0.00105034		300.781	0.00307431
302.734	0.00250478		302.734	0.00187176		302.734	0.00347966
304.688	0.00231919		304.688	0.00170352		304.688	0.00297695
306.641	0.00230806		306.641	0.00173654		306.641	0.00264132
308.594	0.00312053		308.594	0.00259428		308.594	0.00315864
310.547	0.00342011		310.547	0.00290067		310.547	0.00319522
312.5	0.00315018		312.5	0.00263719		312.5	0.00267
314.453	0.00353851		314.453	0.00306774		314.453	0.00289609
316.406	0.00416622		316.406	0.00372197		316.406	0.0034342
318.359	0.00391746		318.359	0.00345829		318.359	0.00299546
320.312	0.00377375		320.312	0.0033238		320.312	0.0026345
322.266	0.00402152		322.266	0.00360841		322.266	0.00283449
324.219	0.00372823		324.219	0.00331445		324.219	0.00254598
326.172	0.00316208		326.172	0.00273768		326.172	0.00184101
328.125	0.00316695		328.125	0.00279181		328.125	0.00176191
330.078	0.00295904		330.078	0.00264183		330.078	0.00165987
332.031	0.00217323		332.031	0.00185699		332.031	0.000977326
333.984	0.00190967		333.984	0.00160444		333.984	0.000645235
335.938	0.00206215		335.938	0.00183111		335.938	0.000881165
337.891	0.00162226		337.891	0.00145196		337.891	0.000733037
339.844	0.00106152		339.844	0.000915994		339.844	0.000665861
341.797	0.00102868		341.797	0.000976279		341.797	0.000805352
343.75	0.000643308		343.75	0.000734754		343.75	0.00116603
345.703	0.000651876		345.703	0.000625685		345.703	0.0019573
347.656	0.00127523		347.656	0.00119625		347.656	0.00243805
349.609	0.00145997		349.609	0.001359		349.609	0.0025028
