# Supplementary material for: Investigating the Pavement Vibration Response for Roadway Service Condition Evaluation
Source: Hindawi journal article supplement (doi:10.1155/2018/2714657), 2018-01-01
Supplement: f1 [file 2714657.f1.zip › data/Figure13 and Figure15/time_domain.xlsx]

## Sheet: asphalt
0	0	0		0	0	0		0	0	0
3.97789e-07	1.09441e-30	1.09441e-31		3.97789e-07	-6.79538e-32	-6.79538e-33		3.97789e-07	-2.71115e-31	-2.71115e-32
7.95578e-07	6.66411e-29	6.66411e-30		7.95578e-07	-3.9518e-30	-3.9518e-31		7.95578e-07	-1.65863e-29	-1.65863e-30
1.19337e-06	2.01145e-27	2.01145e-28		1.19337e-06	-1.13464e-28	-1.13464e-29		1.19337e-06	-5.02964e-28	-5.02964e-29
1.6906e-06	6.64719e-25	6.64719e-26		1.6906e-06	-2.67105e-26	-2.67105e-27		1.6906e-06	-1.69885e-25	-1.69885e-26
2.31215e-06	4.29291e-22	4.29291e-23		2.31215e-06	-7.25778e-24	-7.25778e-25		2.31215e-06	-1.12109e-22	-1.12109e-23
3.08908e-06	1.88747e-19	1.88747e-20		3.08908e-06	1.68552e-21	1.68552e-22		3.08908e-06	-4.98813e-20	-4.98813e-21
4.06024e-06	4.79118e-17	4.79118e-18		4.06024e-06	1.77958e-18	1.77958e-19		4.06024e-06	-1.26605e-17	-1.26605e-18
5.2742e-06	6.99284e-15	6.99284e-16		5.2742e-06	4.74647e-16	4.74647e-17		5.2742e-06	-1.82106e-15	-1.82106e-16
6.79164e-06	6.03996e-13	6.03996e-14		6.79164e-06	6.12303e-14	6.12303e-15		6.79164e-06	-1.52257e-13	-1.52257e-14
8.68845e-06	3.20041e-11	3.20041e-12		8.68845e-06	4.41543e-12	4.41543e-13		8.68845e-06	-7.63129e-12	-7.63129e-13
1.10595e-05	1.07845e-09	1.07845e-10		1.10595e-05	1.91987e-10	1.91987e-11		1.10595e-05	-2.35747e-10	-2.35747e-11
1.40232e-05	2.3905e-08	2.3905e-09		1.40232e-05	5.30515e-09	5.30515e-10		1.40232e-05	-4.57824e-09	-4.57824e-10
1.77279e-05	3.59498e-07	3.59498e-08		1.77279e-05	9.70637e-08	9.70637e-09		1.77279e-05	-5.61289e-08	-5.61289e-09
2.23588e-05	3.77233e-06	3.77233e-07		2.23588e-05	1.21618e-06	1.21618e-07		2.23588e-05	-4.20183e-07	-4.20183e-08
2.81474e-05	2.83338e-05	2.83338e-06		2.81474e-05	1.07391e-05	1.07391e-06		2.81474e-05	-1.59689e-06	-1.59689e-07
3.53831e-05	0.000155933	1.55933e-05		3.53831e-05	6.85298e-05	6.85298e-06		3.53831e-05	1.50685e-06	1.50685e-07
4.44278e-05	0.000642728	6.42728e-05		4.44278e-05	0.000323393	3.23393e-05		4.44278e-05	5.61037e-05	5.61037e-06
5.57336e-05	0.00202706	0.000202706		5.57336e-05	0.00115441	0.000115441		5.57336e-05	0.000359739	3.59739e-05
6.98659e-05	0.00500367	0.000500367		6.98659e-05	0.00319556	0.000319556		6.98659e-05	0.00141359	0.000141359
8.75313e-05	0.00993192	0.000993192		8.75313e-05	0.00707343	0.000707343		8.75313e-05	0.00404736	0.000404736
0.000109613	0.0164399	0.00164399		0.000109613	0.0130425	0.00130425		0.000109613	0.00921127	0.000921127
0.000137215	0.0238364	0.00238364		0.000137215	0.0210746	0.00210746		0.000137215	0.0177515	0.00177515
0.000171718	0.031883	0.0031883		0.000171718	0.0312137	0.00312137		0.000171718	0.0301372	0.00301372
0.000214846	0.0401701	0.00401701		0.000214846	0.0427829	0.00427829		0.000214846	0.0453063	0.00453063
0.000268757	0.0457929	0.00457929		0.000268757	0.0521594	0.00521594		0.000268757	0.0586534	0.00586534
0.000336145	0.0424019	0.00424019		0.000336145	0.0520673	0.00520673		0.000336145	0.0618651	0.00618651
0.00042038	0.023212	0.0023212		0.00042038	0.0349384	0.00349384		0.00042038	0.0467013	0.00467013
0.000525674	-0.0148139	-0.00148139		0.000525674	-0.00260179	-0.000260179		0.000525674	0.00958039	0.000958039
0.000657291	-0.0701052	-0.00701052		0.000657291	-0.0588435	-0.00588435		0.000657291	-0.0476255	-0.00476255
0.000821812	-0.138521	-0.0138521		0.000821812	-0.129221	-0.0129221		0.000821812	-0.119951	-0.0119951
0.00102746	-0.214719	-0.0214719		0.00102746	-0.207946	-0.0207946		0.00102746	-0.20118	-0.020118
0.00128453	-0.292224	-0.0292224		0.00128453	-0.288196	-0.0288196		0.00128453	-0.284167	-0.0284167
0.00160586	-0.363898	-0.0363898		0.00160586	-0.362522	-0.0362522		0.00160586	-0.361141	-0.0361141
0.00200752	-0.422636	-0.0422636		0.00200752	-0.423518	-0.0423518		0.00200752	-0.424402	-0.0424402
0.0025096	-0.46316	-0.046316		0.0025096	-0.465709	-0.0465709		0.0025096	-0.468303	-0.0468303
0.0031372	-0.482161	-0.0482161		0.0031372	-0.485829	-0.0485829		0.0031372	-0.489606	-0.0489606
0.0039217	-0.476478	-0.0476478		0.0039217	-0.480591	-0.0480591		0.0039217	-0.484849	-0.0484849
0.00490233	-0.445814	-0.0445814		0.00490233	-0.449689	-0.0449689		0.00490233	-0.453719	-0.0453719
0.00590233	-0.400748	-0.0400748		0.00590233	-0.404248	-0.0404248		0.00590233	-0.407928	-0.0407928
0.00690233	-0.345486	-0.0345486		0.00690233	-0.348687	-0.0348687		0.00690233	-0.352086	-0.0352086
0.00790233	-0.280361	-0.0280361		0.00790233	-0.283215	-0.0283215		0.00790233	-0.286242	-0.0286242
0.00890233	-0.207354	-0.0207354		0.00890233	-0.209692	-0.0209692		0.00890233	-0.212142	-0.0212142
0.00990233	-0.129542	-0.0129542		0.00990233	-0.131322	-0.0131322		0.00990233	-0.133197	-0.0133197
0.0109023	-0.0545361	-0.00545361		0.0109023	-0.0554946	-0.00554946		0.0109023	-0.0565573	-0.00565573
0.0119023	0.00415259	0.000415259		0.0119023	0.00414773	0.000414773		0.0119023	0.00409193	0.000409193
0.0129023	0.0491219	0.00491219		0.0129023	0.0494455	0.00494455		0.0129023	0.049795	0.0049795
0.0139023	0.0953647	0.00953647		0.0139023	0.0957913	0.00957913		0.0139023	0.0962618	0.00962618
0.0149023	0.139014	0.0139014		0.0149023	0.139966	0.0139966		0.0149023	0.140948	0.0140948
0.0159023	0.166479	0.0166479		0.0159023	0.167984	0.0167984		0.0159023	0.169556	0.0169556
0.0169023	0.179174	0.0179174		0.0169023	0.180901	0.0180901		0.0169023	0.182753	0.0182753
0.0179023	0.185967	0.0185967		0.0179023	0.187646	0.0187646		0.0179023	0.189448	0.0189448
0.0189023	0.191705	0.0191705		0.0189023	0.193198	0.0193198		0.0189023	0.194775	0.0194775
0.0199023	0.197443	0.0197443		0.0199023	0.198814	0.0198814		0.0199023	0.200298	0.0200298
0.0209023	0.203185	0.0203185		0.0209023	0.204579	0.0204579		0.0209023	0.206137	0.0206137
0.0219023	0.206164	0.0206164		0.0219023	0.207575	0.0207575		0.0219023	0.20911	0.020911
0.0229023	0.204906	0.0204906		0.0229023	0.206125	0.0206125		0.0229023	0.207406	0.0207406
0.0239023	0.202073	0.0202073		0.0239023	0.203107	0.0203107		0.0239023	0.204236	0.0204236
0.0249023	0.197984	0.0197984		0.0249023	0.199051	0.0199051		0.0249023	0.200262	0.0200262
0.0259023	0.18529	0.018529		0.0259023	0.186455	0.0186455		0.0259023	0.187695	0.0187695
0.0269023	0.16522	0.016522		0.0269023	0.165931	0.0165931		0.0269023	0.166644	0.0166644
0.0279023	0.152661	0.0152661		0.0279023	0.152859	0.0152859		0.0279023	0.153104	0.0153104
0.0289023	0.143018	0.0143018		0.0289023	0.143443	0.0143443		0.0289023	0.143962	0.0143962
0.0299023	0.126622	0.0126622		0.0299023	0.126938	0.0126938		0.0299023	0.127283	0.0127283
0.0309023	0.115373	0.0115373		0.0309023	0.115103	0.0115103		0.0309023	0.114774	0.0114774
0.0319023	0.113552	0.0113552		0.0319023	0.113174	0.0113174		0.0319023	0.112793	0.0112793
0.0329023	0.112279	0.0112279		0.0329023	0.11219	0.011219		0.0329023	0.112184	0.0112184
0.0339023	0.104718	0.0104718		0.0339023	0.104756	0.0104756		0.0339023	0.104789	0.0104789
0.0349023	0.0894804	0.00894804		0.0349023	0.0893341	0.00893341		0.0349023	0.0890555	0.00890555
0.0359023	0.0723069	0.00723069		0.0359023	0.0719758	0.00719758		0.0359023	0.0716022	0.00716022
0.0369023	0.0636924	0.00636924		0.0369023	0.0633121	0.00633121		0.0369023	0.0630317	0.00630317
0.0379023	0.0616264	0.00616264		0.0379023	0.0613119	0.00613119		0.0379023	0.0609896	0.00609896
0.0389023	0.0591839	0.00591839		0.0389023	0.0586491	0.00586491		0.0389023	0.0579575	0.00579575
0.0399023	0.0544936	0.00544936		0.0399023	0.054075	0.0054075		0.0399023	0.0535968	0.00535968
0.0409023	0.0341023	0.00341023		0.0409023	0.0343508	0.00343508		0.0409023	0.0346699	0.00346699
0.0419023	0.00289206	0.000289206		0.0419023	0.00284333	0.000284333		0.0419023	0.00277123	0.000277123
0.0429023	-0.0151561	-0.00151561		0.0429023	-0.0160101	-0.00160101		0.0429023	-0.017069	-0.0017069
0.0439023	-0.0208741	-0.00208741		0.0439023	-0.0217594	-0.00217594		0.0439023	-0.0227253	-0.00227253
0.0449023	-0.0244596	-0.00244596		0.0449023	-0.0248667	-0.00248667		0.0449023	-0.0251227	-0.00251227
0.0459023	-0.0294272	-0.00294272		0.0459023	-0.0297175	-0.00297175		0.0459023	-0.0300131	-0.00300131
0.0469023	-0.0425246	-0.00425246		0.0469023	-0.0430911	-0.00430911		0.0469023	-0.0439637	-0.00439637
0.0479023	-0.0630995	-0.00630995		0.0479023	-0.0637522	-0.00637522		0.0479023	-0.0645307	-0.00645307
0.0489023	-0.0677799	-0.00677799		0.0489023	-0.0683713	-0.00683713		0.0489023	-0.0687083	-0.00687083
0.0499023	-0.0434409	-0.00434409		0.0499023	-0.0440937	-0.00440937		0.0499023	-0.0446557	-0.00446557
0.0509023	-0.0140473	-0.00140473		0.0509023	-0.0147424	-0.00147424		0.0509023	-0.0157642	-0.00157642
0.0519023	-0.00961906	-0.000961906		0.0519023	-0.00969274	-0.000969274		0.0519023	-0.00988962	-0.000988962
0.0529023	-0.0177011	-0.00177011		0.0529023	-0.0172264	-0.00172264		0.0529023	-0.0164099	-0.00164099
0.0539023	-0.00746747	-0.000746747		0.0539023	-0.00729811	-0.000729811		0.0539023	-0.00699889	-0.000699889
0.0549023	0.00342347	0.000342347		0.0549023	0.00327136	0.000327136		0.0549023	0.00270432	0.000270432
0.0559023	-0.00999306	-0.000999306		0.0559023	-0.00989821	-0.000989821		0.0559023	-0.00993246	-0.000993246
0.0569023	-0.0309667	-0.00309667		0.0569023	-0.0302835	-0.00302835		0.0569023	-0.0291702	-0.00291702
0.0579023	-0.0381524	-0.00381524		0.0579023	-0.0377699	-0.00377699		0.0579023	-0.0372463	-0.00372463
0.0589023	-0.021486	-0.0021486		0.0589023	-0.0222645	-0.00222645		0.0589023	-0.0234841	-0.00234841
0.0599023	-0.00950138	-0.000950138		0.0599023	-0.00970458	-0.000970458		0.0599023	-0.0100498	-0.00100498
0.0609023	-0.0262798	-0.00262798		0.0609023	-0.0251447	-0.00251447		0.0609023	-0.0234788	-0.00234788
0.0619023	-0.0296709	-0.00296709		0.0619023	-0.0291431	-0.00291431		0.0619023	-0.0283844	-0.00283844
0.0629023	-0.0121771	-0.00121771		0.0629023	-0.012736	-0.0012736		0.0629023	-0.0139022	-0.00139022
0.0639023	-0.0217109	-0.00217109		0.0639023	-0.02175	-0.002175		0.0639023	-0.0220239	-0.00220239
0.0649023	-0.0471753	-0.00471753		0.0649023	-0.046196	-0.0046196		0.0649023	-0.0445085	-0.00445085
0.0659023	-0.0455663	-0.00455663		0.0659023	-0.0450241	-0.00450241		0.0659023	-0.0442025	-0.00442025
0.0669023	-0.0302833	-0.00302833		0.0669023	-0.031083	-0.0031083		0.0669023	-0.0326782	-0.00326782
0.0679023	-0.0269172	-0.00269172		0.0679023	-0.0275204	-0.00275204		0.0679023	-0.0283656	-0.00283656
0.0689023	-0.0367731	-0.00367731		0.0689023	-0.035581	-0.0035581		0.0689023	-0.0335094	-0.00335094
0.0699023	-0.0567923	-0.00567923		0.0699023	-0.0556936	-0.00556936		0.0699023	-0.0543655	-0.00543655
0.0709023	-0.0707682	-0.00707682		0.0709023	-0.0720437	-0.00720437		0.0709023	-0.0743548	-0.00743548
0.0719023	-0.0642454	-0.00642454		0.0719023	-0.0657717	-0.00657717		0.0719023	-0.0676291	-0.00676291
0.0729023	-0.071065	-0.0071065		0.0729023	-0.0699567	-0.00699567		0.0729023	-0.0677963	-0.00677963
0.0739023	-0.0812703	-0.00812703		0.0739023	-0.0803785	-0.00803785		0.0739023	-0.0790773	-0.00790773
0.0749023	-0.0683303	-0.00683303		0.0749023	-0.0701738	-0.00701738		0.0749023	-0.0733414	-0.00733414
0.0759023	-0.0591542	-0.00591542		0.0759023	-0.0608156	-0.00608156		0.0759023	-0.0630224	-0.00630224
0.0769023	-0.0661291	-0.00661291		0.0769023	-0.0648284	-0.00648284		0.0769023	-0.0621116	-0.00621116
0.0779023	-0.0618064	-0.00618064		0.0779023	-0.0605222	-0.00605222		0.0779023	-0.0586509	-0.00586509
0.0789023	-0.00926289	-0.000926289		0.0789023	-0.0114221	-0.00114221		0.0789023	-0.0151196	-0.00151196
0.0799023	0.0134292	0.00134292		0.0799023	0.0121411	0.00121411		0.0799023	0.0100504	0.00100504
0.0809023	-0.0410115	-0.00410115		0.0809023	-0.0386902	-0.00386902		0.0809023	-0.0347108	-0.00347108
0.0819023	-0.0475586	-0.00475586		0.0819023	-0.0461819	-0.00461819		0.0819023	-0.0438896	-0.00438896
0.0829023	0.021278	0.0021278		0.0829023	0.0187472	0.00187472		0.0829023	0.0142036	0.00142036
0.0839023	0.0449374	0.00449374		0.0839023	0.0431677	0.00431677		0.0839023	0.0403776	0.00403776
0.0849023	-0.0263145	-0.00263145		0.0849023	-0.0234928	-0.00234928		0.0849023	-0.0186424	-0.00186424
0.0859023	-0.0591571	-0.00591571		0.0859023	-0.0573298	-0.00573298		0.0859023	-0.0543914	-0.00543914
0.0869023	-0.0274334	-0.00274334		0.0869023	-0.0309469	-0.00309469		0.0869023	-0.0372322	-0.00372322
0.0879023	0.00249528	0.000249528		0.0879023	-0.00114656	-0.000114656		0.0879023	-0.00606311	-0.000606311
0.0889023	0.0332247	0.00332247		0.0889023	0.0363001	0.00363001		0.0889023	0.0425761	0.00425761
0.0899023	0.0442972	0.00442972		0.0899023	0.0484248	0.00484248		0.0899023	0.0538077	0.00538077
0.0909023	0.0447145	0.00447145		0.0909023	0.0414657	0.00414657		0.0909023	0.0346841	0.00346841
0.0919023	0.040723	0.0040723		0.0919023	0.0365015	0.00365015		0.0919023	0.0304715	0.00304715
0.0929023	-0.0184073	-0.00184073		0.0929023	-0.0148267	-0.00148267		0.0929023	-0.00778135	-0.000778135
0.0939023	-0.0474736	-0.00474736		0.0939023	-0.0436878	-0.00436878		0.0939023	-0.0380219	-0.00380219
0.0949023	0.0033101	0.00033101		0.0949023	-0.00187799	-0.000187799		0.0949023	-0.0114865	-0.00114865
0.0959023	0.0316531	0.00316531		0.0959023	0.025758	0.0025758		0.0959023	0.0173299	0.00173299
0.0969023	-0.0383462	-0.00383462		0.0969023	-0.0338982	-0.00338982		0.0969023	-0.0250491	-0.00250491
0.0979023	-0.0499104	-0.00499104		0.0979023	-0.0445548	-0.00445548		0.0979023	-0.0364374	-0.00364374
0.0989023	0.0543476	0.00543476		0.0989023	0.0484976	0.00484976		0.0989023	0.0370089	0.00370089
0.0999023	0.0961189	0.00961189		0.0999023	0.0892876	0.00892876		0.0999023	0.0789983	0.00789983
0.100902	0.010438	0.0010438		0.100902	0.016751	0.0016751		0.100902	0.0289151	0.00289151
0.101902	-0.0295939	-0.00295939		0.101902	-0.0217775	-0.00217775		0.101902	-0.0105806	-0.00105806
0.102902	0.107297	0.0107297		0.102902	0.100526	0.0100526		0.102902	0.0868075	0.00868075
0.103902	0.169645	0.0169645		0.103902	0.161496	0.0161496		0.103902	0.148615	0.0148615
0.104902	-0.0264982	-0.00264982		0.104902	-0.0190239	-0.00190239		0.104902	-0.00483337	-0.000483337
0.105902	-0.104042	-0.0104042		0.105902	-0.0951388	-0.00951388		0.105902	-0.0815137	-0.00815137
0.106902	0.098833	0.0098833		0.106902	0.0906358	0.00906358		0.106902	0.0733723	0.00733723
0.107902	0.209586	0.0209586		0.107902	0.199216	0.0199216		0.107902	0.182548	0.0182548
0.108902	0.0164787	0.00164787		0.108902	0.0258787	0.00258787		0.108902	0.0444232	0.00444232
0.109902	0.0109042	0.00109042		0.109902	0.02383	0.002383		0.109902	0.0442525	0.00442525
0.110902	0.2287	0.02287		0.110902	0.221863	0.0221863		0.110902	0.202451	0.0202451
0.111902	0.232182	0.0232182		0.111902	0.220426	0.0220426		0.111902	0.199461	0.0199461
0.112902	-0.0704949	-0.00704949		0.112902	-0.062367	-0.0062367		0.112902	-0.0434328	-0.00434328
0.113902	-0.146858	-0.0146858		0.113902	-0.133791	-0.0133791		0.113902	-0.110825	-0.0110825
0.114902	0.0807312	0.00807312		0.114902	0.072108	0.0072108		0.114902	0.0462873	0.00462873
0.115902	0.154187	0.0154187		0.115902	0.138997	0.0138997		0.115902	0.10992	0.010992
0.116902	-0.120262	-0.0120262		0.116902	-0.112797	-0.0112797		0.116902	-0.0898759	-0.00898759
0.117902	-0.169847	-0.0169847		0.117902	-0.154343	-0.0154343		0.117902	-0.122238	-0.0122238
0.118902	0.0726182	0.00726182		0.118902	0.0657687	0.00657687		0.118902	0.0345652	0.00345652
0.119902	0.167739	0.0167739		0.119902	0.151794	0.0151794		0.119902	0.113922	0.0113922
0.120902	-0.121136	-0.0121136		0.120902	-0.114768	-0.0114768		0.120902	-0.0852763	-0.00852763
0.121902	-0.198972	-0.0198972		0.121902	-0.182478	-0.0182478		0.121902	-0.137526	-0.0137526
0.122902	0.171482	0.0171482		0.122902	0.167799	0.0167799		0.122902	0.133244	0.0133244
0.123902	0.215559	0.0215559		0.123902	0.200848	0.0200848		0.123902	0.149406	0.0149406
0.124902	-0.296381	-0.0296381		0.124902	-0.294644	-0.0294644		0.124902	-0.261991	-0.0261991
0.125902	-0.461399	-0.0461399		0.125902	-0.447421	-0.0447421		0.125902	-0.385053	-0.0385053
0.126902	-0.0569603	-0.00569603		0.126902	-0.0620153	-0.00620153		0.126902	-0.108452	-0.0108452
0.127902	0.118225	0.0118225		0.127902	0.0951528	0.00951528		0.127902	0.0144281	0.00144281
0.128902	-0.364264	-0.0364264		0.128902	-0.364396	-0.0364396		0.128902	-0.311558	-0.0311558
0.129902	-0.601967	-0.0601967		0.129902	-0.575086	-0.0575086		0.129902	-0.459128	-0.0459128
0.130902	-0.0189172	-0.00189172		0.130902	-0.0300667	-0.00300667		0.130902	-0.0841211	-0.00841211
0.131902	0.233043	0.0233043		0.131902	0.174826	0.0174826		0.131902	0.0437757	0.00437757
0.132902	-0.540752	-0.0540752		0.132902	-0.534943	-0.0534943		0.132902	-0.438128	-0.0438128
0.133902	-1.07171	-0.107171		0.133902	-0.985628	-0.0985628		0.133902	-0.743097	-0.0743097
0.134902	-0.283117	-0.0283117		0.134902	-0.336364	-0.0336364		0.134902	-0.379075	-0.0379075
0.135902	0.514054	0.0514054		0.135902	0.300231	0.0300231		0.135902	0.0986665	0.00986665
0.136902	-0.67588	-0.067588		0.136902	-0.596722	-0.0596722		0.136902	-0.353592	-0.0353592
0.137902	-1.5502	-0.15502		0.137902	-1.17812	-0.117812		0.137902	-0.519789	-0.0519789
0.138902	-0.352801	-0.0352801		0.138902	-0.623442	-0.0623442		0.138902	-0.324006	-0.0324006
0.139902	0.729096	0.0729096		0.139902	-0.0344019	-0.00344019		0.139902	0.141166	0.0141166
0.140902	-2.22455	-0.222455		0.140902	-1.29016	-0.129016		0.140902	-0.679865	-0.0679865
0.141902	-4.44597	-0.444597		0.141902	-1.04715	-0.104715		0.141902	-0.0424407	-0.00424407
0.142902	-1.96906	-0.196906		0.142902	-0.759639	-0.0759639		0.142902	-0.17518	-0.017518
0.143902	-0.0114204	-0.00114204		0.143902	0.209941	0.0209941		0.143902	0.386096	0.0386096
0.144902	1.07587	0.107587		0.144902	0.445198	0.0445198		0.144902	0.516414	0.0516414
0.145902	-0.897238	-0.0897238		0.145902	-0.554538	-0.0554538		0.145902	-0.0776524	-0.00776524
0.146902	1.18754	0.118754		0.146902	0.652562	0.0652562		0.146902	0.357366	0.0357366
0.147902	2.19586	0.219586		0.147902	1.51706	0.151706		0.147902	0.793098	0.0793098
0.148902	1.93741	0.193741		0.148902	0.974064	0.0974064		0.148902	0.275963	0.0275963
0.149902	2.06892	0.206892		0.149902	1.33866	0.133866		0.149902	0.561326	0.0561326
0.150902	2.30869	0.230869		0.150902	1.43282	0.143282		0.150902	0.51047	0.051047
0.151902	2.56658	0.256658		0.151902	1.69911	0.169911		0.151902	0.727751	0.0727751
0.152902	2.27825	0.227825		0.152902	1.18238	0.118238		0.152902	0.218335	0.0218335
0.153902	3.51887	0.351887		0.153902	2.26808	0.226808		0.153902	0.970332	0.0970332
0.154902	2.90642	0.290642		0.154902	1.99583	0.199583		0.154902	1.02806	0.102806
0.155902	1.84984	0.184984		0.155902	1.3157	0.13157		0.155902	0.902163	0.0902163
0.156902	1.33705	0.133705		0.156902	0.265686	0.0265686		0.156902	0.0360778	0.00360778
0.157902	2.62275	0.262275		0.157902	1.12458	0.112458		0.157902	0.784994	0.0784994
0.158902	-0.645062	-0.0645062		0.158902	-0.0789039	-0.00789039		0.158902	0.261356	0.0261356
0.159902	-3.71984	-0.371984		0.159902	-0.588899	-0.0588899		0.159902	0.143684	0.0143684
0.160902	-1.57326	-0.157326		0.160902	-0.341557	-0.0341557		0.160902	0.171765	0.0171765
0.161902	-0.806579	-0.0806579		0.161902	-0.312429	-0.0312429		0.161902	0.0452223	0.00452223
0.162902	-0.803089	-0.0803089		0.162902	-0.690667	-0.0690667		0.162902	-0.193439	-0.0193439
0.163902	-1.75647	-0.175647		0.163902	-1.09124	-0.109124		0.163902	-0.286871	-0.0286871
0.164902	-0.874245	-0.0874245		0.164902	-0.848123	-0.0848123		0.164902	-0.478572	-0.0478572
0.165902	0.00621477	0.000621477		0.165902	0.0954543	0.00954543		0.165902	0.207	0.0207
0.166902	-0.174516	-0.0174516		0.166902	-0.214439	-0.0214439		0.166902	-0.0968435	-0.00968435
0.167902	-0.885652	-0.0885652		0.167902	-0.734895	-0.0734895		0.167902	-0.452719	-0.0452719
0.168902	-0.316981	-0.0316981		0.168902	-0.379074	-0.0379074		0.168902	-0.279747	-0.0279747
0.169902	0.198611	0.0198611		0.169902	0.233422	0.0233422		0.169902	0.235981	0.0235981
0.170902	-0.0991817	-0.00991817		0.170902	-0.13011	-0.013011		0.170902	-0.123234	-0.0123234
0.171902	-0.359096	-0.0359096		0.171902	-0.319462	-0.0319462		0.171902	-0.212307	-0.0212307
0.172902	-0.0915409	-0.00915409		0.172902	-0.125231	-0.0125231		0.172902	-0.100743	-0.0100743
0.173902	0.135567	0.0135567		0.173902	0.154188	0.0154188		0.173902	0.136757	0.0136757
0.174902	-0.0185972	-0.00185972		0.174902	-0.0352202	-0.00352202		0.174902	-0.0504682	-0.00504682
0.175902	-0.244199	-0.0244199		0.175902	-0.229808	-0.0229808		0.175902	-0.183187	-0.0183187
0.176902	0.000422831	4.22831e-05		0.176902	-0.0127153	-0.00127153		0.176902	-0.00283365	-0.000283365
0.177902	0.0578878	0.00578878		0.177902	0.0650919	0.00650919		0.177902	0.0431562	0.00431562
0.178902	-0.127637	-0.0127637		0.178902	-0.139702	-0.0139702		0.178902	-0.15975	-0.015975
0.179902	-0.256599	-0.0256599		0.179902	-0.248277	-0.0248277		0.179902	-0.222808	-0.0222808
0.180902	-0.0527483	-0.00527483		0.180902	-0.0567984	-0.00567984		0.180902	-0.0501935	-0.00501935
0.181902	0.141809	0.0141809		0.181902	0.141951	0.0141951		0.181902	0.124595	0.0124595
0.182902	0.0665492	0.00665492		0.182902	0.0615232	0.00615232		0.182902	0.0499155	0.00499155
0.183902	-0.155812	-0.0155812		0.183902	-0.14716	-0.014716		0.183902	-0.130558	-0.0130558
0.184902	-0.095134	-0.0095134		0.184902	-0.0954676	-0.00954676		0.184902	-0.0904904	-0.00904904
0.185902	0.130469	0.0130469		0.185902	0.125823	0.0125823		0.185902	0.110285	0.0110285
0.186902	0.0568872	0.00568872		0.186902	0.0535257	0.00535257		0.186902	0.0433264	0.00433264
0.187902	-0.160791	-0.0160791		0.187902	-0.153326	-0.0153326		0.187902	-0.140421	-0.0140421
0.188902	-0.126033	-0.0126033		0.188902	-0.125388	-0.0125388		0.188902	-0.121391	-0.0121391
0.189902	0.0369514	0.00369514		0.189902	0.029782	0.0029782		0.189902	0.0144535	0.00144535
0.190902	-0.0103022	-0.00103022		0.190902	-0.0137885	-0.00137885		0.190902	-0.0225784	-0.00225784
0.191902	-0.0868785	-0.00868785		0.191902	-0.0794321	-0.00794321		0.191902	-0.066142	-0.0066142
0.192902	-0.0207945	-0.00207945		0.192902	-0.018359	-0.0018359		0.192902	-0.0137506	-0.00137506
0.193902	0.0239477	0.00239477		0.193902	0.0177732	0.00177732		0.193902	0.00501956	0.000501956
0.194902	-0.0591533	-0.00591533		0.194902	-0.0628901	-0.00628901		0.194902	-0.0708912	-0.00708912
0.195902	-0.139196	-0.0139196		0.195902	-0.133626	-0.0133626		0.195902	-0.123406	-0.0123406
0.196902	-0.0750392	-0.00750392		0.196902	-0.0735176	-0.00735176		0.196902	-0.0699051	-0.00699051
0.197902	0.0332641	0.00332641		0.197902	0.0275668	0.00275668		0.197902	0.0169636	0.00169636
0.198902	-0.0605508	-0.00605508		0.198902	-0.0628293	-0.00628293		0.198902	-0.0687445	-0.00687445
0.199902	-0.185289	-0.0185289		0.199902	-0.181216	-0.0181216		0.199902	-0.173171	-0.0173171
0.200902	-0.109224	-0.0109224		0.200902	-0.108517	-0.0108517		0.200902	-0.105841	-0.0105841
0.201902	-0.0157437	-0.00157437		0.201902	-0.0208677	-0.00208677		0.201902	-0.0303477	-0.00303477
0.202902	-0.0320072	-0.00320072		0.202902	-0.0338458	-0.00338458		0.202902	-0.0377296	-0.00377296
0.203902	-0.111448	-0.0111448		0.203902	-0.106899	-0.0106899		0.203902	-0.0991197	-0.00991197
0.204902	-0.116116	-0.0116116		0.204902	-0.115228	-0.0115228		0.204902	-0.112985	-0.0112985
0.205902	-0.0354513	-0.00354513		0.205902	-0.0402917	-0.00402917		0.205902	-0.0485701	-0.00485701
0.206902	-0.0439902	-0.00439902		0.206902	-0.0454868	-0.00454868		0.206902	-0.0487267	-0.00487267
0.207902	-0.103862	-0.0103862		0.207902	-0.100191	-0.0100191		0.207902	-0.0934574	-0.00934574
0.208902	-0.058968	-0.0058968		0.208902	-0.0580504	-0.00580504		0.208902	-0.0558673	-0.00558673
0.209902	0.022363	0.0022363		0.209902	0.0191121	0.00191121		0.209902	0.0128926	0.00128926
0.210902	-0.00294423	-0.000294423		0.210902	-0.00358653	-0.000358653		0.210902	-0.00554593	-0.000554593
0.211902	-0.0610921	-0.00610921		0.211902	-0.0579496	-0.00579496		0.211902	-0.052217	-0.0052217
0.212902	-0.0379858	-0.00379858		0.212902	-0.0371662	-0.00371662		0.212902	-0.0354424	-0.00354424
0.213902	-0.00554109	-0.000554109		0.213902	-0.0083345	-0.00083345		0.213902	-0.0137193	-0.00137193
0.214902	-0.0245923	-0.00245923		0.214902	-0.025757	-0.0025757		0.214902	-0.027823	-0.0027823
0.215902	-0.0623214	-0.00623214		0.215902	-0.0598985	-0.00598985		0.215902	-0.055338	-0.0055338
0.216902	-0.0420352	-0.00420352		0.216902	-0.0415686	-0.00415686		0.216902	-0.0403681	-0.00403681
0.217902	-0.00186255	-0.000186255		0.217902	-0.00430849	-0.000430849		0.217902	-0.00890691	-0.000890691
0.218902	-0.0383004	-0.00383004		0.218902	-0.0390483	-0.00390483		0.218902	-0.040624	-0.0040624
0.219902	-0.0679839	-0.00679839		0.219902	-0.0664335	-0.00664335		0.219902	-0.0629151	-0.00629151
0.220902	-0.0108491	-0.00108491		0.220902	-0.0106105	-0.00106105		0.220902	-0.00975007	-0.000975007
0.221902	0.0453276	0.00453276		0.221902	0.0437305	0.00437305		0.221902	0.0403771	0.00403771
0.222902	0.0361708	0.00361708		0.222902	0.0360556	0.00360556		0.222902	0.0354435	0.00354435
0.223902	0.00176844	0.000176844		0.223902	0.00380918	0.000380918		0.223902	0.00733402	0.000733402
0.224902	-0.0084868	-0.00084868		0.224902	-0.00792067	-0.000792067		0.224902	-0.00704246	-0.000704246
0.225902	0.0160346	0.00160346		0.225902	0.0140978	0.00140978		0.225902	0.0108098	0.00108098
0.226902	0.0348928	0.00348928		0.226902	0.0342888	0.00342888		0.226902	0.0333736	0.00333736
0.227902	0.0131901	0.00131901		0.227902	0.0149937	0.00149937		0.227902	0.0179659	0.00179659
0.228902	-0.00149071	-0.000149071		0.228902	-0.00110173	-0.000110173		0.228902	-0.00047114	-4.7114e-05
0.229902	0.0140066	0.00140066		0.229902	0.0123498	0.00123498		0.229902	0.00953463	0.000953463
0.230902	0.0139899	0.00139899		0.230902	0.0134534	0.00134534		0.230902	0.0126426	0.00126426
0.231902	0.00289287	0.000289287		0.231902	0.00394685	0.000394685		0.231902	0.00605507	0.000605507
0.232902	0.0182174	0.00182174		0.232902	0.0183624	0.00183624		0.232902	0.0187129	0.00187129
0.233902	0.0389669	0.00389669		0.233902	0.0378911	0.00378911		0.233902	0.0358387	0.00358387
0.234902	0.0338743	0.00338743		0.234902	0.033659	0.0033659		0.234902	0.0332485	0.00332485
0.235902	0.0223023	0.00223023		0.235902	0.0232785	0.00232785		0.235902	0.0251238	0.00251238
0.236902	0.0254877	0.00254877		0.236902	0.0257657	0.00257657		0.236902	0.0261534	0.00261534
0.237902	0.031897	0.0031897		0.237902	0.0309736	0.00309736		0.237902	0.0292543	0.00292543
0.238902	0.0459284	0.00459284		0.238902	0.045365	0.0045365		0.238902	0.0447599	0.00447599
0.239902	0.0648031	0.00648031		0.239902	0.0656823	0.00656823		0.239902	0.0672955	0.00672955
0.240902	0.0765331	0.00765331		0.240902	0.0771627	0.00771627		0.240902	0.0778683	0.00778683
0.241902	0.0652437	0.00652437		0.241902	0.0651192	0.00651192		0.241902	0.064299	0.0064299
0.242902	0.0253804	0.00253804		0.242902	0.0255402	0.00255402		0.242902	0.0255557	0.00255557
0.243902	-0.00521732	-0.000521732		0.243902	-0.00484906	-0.000484906		0.243902	-0.0039095	-0.00039095
0.244902	-0.00523533	-0.000523533		0.244902	-0.00551387	-0.000551387		0.244902	-0.0057266	-0.00057266
0.245902	0.0114083	0.00114083		0.245902	0.0103224	0.00103224		0.245902	0.00873366	0.000873366
0.246902	0.0265305	0.00265305		0.246902	0.0261029	0.00261029		0.246902	0.0256389	0.00256389
0.247902	0.0335704	0.00335704		0.247902	0.0341253	0.00341253		0.247902	0.0351584	0.00351584
0.248902	0.0437476	0.00437476		0.248902	0.0439445	0.00439445		0.248902	0.044182	0.0044182
0.249902	0.0471994	0.00471994		0.249902	0.0470126	0.00470126		0.249902	0.0463855	0.00463855
0.250902	0.0307409	0.00307409		0.250902	0.0309536	0.00309536		0.250902	0.0311117	0.00311117
0.251902	0.0135573	0.00135573		0.251902	0.0140139	0.00140139		0.251902	0.0148524	0.00148524
0.252902	0.0165172	0.00165172		0.252902	0.0163925	0.00163925		0.252902	0.0163096	0.00163096
0.253902	0.026462	0.0026462		0.253902	0.0259863	0.00259863		0.253902	0.0251721	0.00251721
0.254902	0.0230324	0.00230324		0.254902	0.023066	0.0023066		0.254902	0.0230695	0.00230695
0.255902	0.021513	0.0021513		0.255902	0.0217189	0.00217189		0.255902	0.0222625	0.00222625
0.256902	0.0347767	0.00347767		0.256902	0.0347627	0.00347627		0.256902	0.034766	0.0034766
0.257902	0.0271137	0.00271137		0.257902	0.0274003	0.00274003		0.257902	0.0273607	0.00273607
0.258902	0.00207693	0.000207693		0.258902	0.00213674	0.000213674		0.258902	0.00219522	0.000219522
0.259902	0.000199564	1.99564e-05		0.259902	5.77848e-05	5.77848e-06		0.259902	0.000190162	1.90162e-05
0.260902	0.00146607	0.000146607		0.260902	0.00170202	0.000170202		0.260902	0.00190053	0.000190053
0.261902	-0.0230785	-0.00230785		0.261902	-0.0229336	-0.00229336		0.261902	-0.0230565	-0.00230565
0.262902	-0.0523021	-0.00523021		0.262902	-0.0524947	-0.00524947		0.262902	-0.0527044	-0.00527044
0.263902	-0.0657555	-0.00657555		0.263902	-0.0659835	-0.00659835		0.263902	-0.0660234	-0.00660234
0.264902	-0.0608133	-0.00608133		0.264902	-0.0614369	-0.00614369		0.264902	-0.0620608	-0.00620608
0.265902	-0.0425276	-0.00425276		0.265902	-0.0433955	-0.00433955		0.265902	-0.0444464	-0.00444464
0.266902	-0.0251954	-0.00251954		0.266902	-0.0255887	-0.00255887		0.266902	-0.0259825	-0.00259825
0.267902	-0.0104484	-0.00104484		0.267902	-0.0104916	-0.00104916		0.267902	-0.0103709	-0.00103709
0.268902	0.00133995	0.000133995		0.268902	0.00147078	0.000147078		0.268902	0.00157612	0.000157612
0.269902	0.000778254	7.78254e-05		0.269902	0.000904248	9.04248e-05		0.269902	0.000874665	8.74665e-05
0.270902	-0.0014411	-0.00014411		0.270902	-0.0014966	-0.00014966		0.270902	-0.00153305	-0.000153305
0.271902	-0.000420389	-4.20389e-05		0.271902	-0.000147167	-1.47167e-05		0.271902	0.000243604	2.43604e-05
0.272902	-0.00655915	-0.000655915		0.272902	-0.00625727	-0.000625727		0.272902	-0.00597444	-0.000597444
0.273902	-0.0151638	-0.00151638		0.273902	-0.0152226	-0.00152226		0.273902	-0.0153978	-0.00153978
0.274902	-0.0214284	-0.00214284		0.274902	-0.0214846	-0.00214846		0.274902	-0.0215339	-0.00215339
0.275902	-0.0193361	-0.00193361		0.275902	-0.0195517	-0.00195517		0.275902	-0.0196546	-0.00196546
0.276902	-0.00434234	-0.000434234		0.276902	-0.00469356	-0.000469356		0.276902	-0.00504824	-0.000504824
0.277902	0.00876699	0.000876699		0.277902	0.00867908	0.000867908		0.277902	0.00849759	0.000849759
0.278902	0.00772938	0.000772938		0.278902	0.00805791	0.000805791		0.278902	0.00838608	0.000838608
0.279902	-0.00172839	-0.000172839		0.279902	-0.00137733	-0.000137733		0.279902	-0.000948596	-9.48596e-05
0.280902	-0.00602489	-0.000602489		0.280902	-0.00602957	-0.000602957		0.280902	-0.00603999	-0.000603999
0.281902	-0.00806518	-0.000806518		0.281902	-0.00804571	-0.000804571		0.281902	-0.0080995	-0.00080995
0.282902	-0.0145548	-0.00145548		0.282902	-0.0145111	-0.00145111		0.282902	-0.0144604	-0.00144604
0.283902	-0.0181707	-0.00181707		0.283902	-0.0182243	-0.00182243		0.283902	-0.0182191	-0.00182191
0.284902	-0.0183078	-0.00183078		0.284902	-0.0183754	-0.00183754		0.284902	-0.0184598	-0.00184598
0.285902	-0.020112	-0.0020112		0.285902	-0.0202331	-0.00202331		0.285902	-0.0204181	-0.00204181
0.286902	-0.0258669	-0.00258669		0.286902	-0.0257943	-0.00257943		0.286902	-0.0257275	-0.00257275
0.287902	-0.0369755	-0.00369755		0.287902	-0.0368318	-0.00368318		0.287902	-0.0366529	-0.00366529
0.288902	-0.0419732	-0.00419732		0.288902	-0.0424015	-0.00424015		0.288902	-0.0428455	-0.00428455
0.289902	-0.0325445	-0.00325445		0.289902	-0.0331849	-0.00331849		0.289902	-0.0338815	-0.00338815
0.290902	-0.0231612	-0.00231612		0.290902	-0.0233278	-0.00233278		0.290902	-0.0235052	-0.00235052
0.291902	-0.0208614	-0.00208614		0.291902	-0.0209741	-0.00209741		0.291902	-0.0210606	-0.00210606
0.292902	-0.0134828	-0.00134828		0.292902	-0.0139059	-0.00139059		0.292902	-0.0143518	-0.00143518
0.293902	2.99138e-05	2.99138e-06		0.293902	-0.000388616	-3.88616e-05		0.293902	-0.000860255	-8.60255e-05
0.294902	0.0160946	0.00160946		0.294902	0.0155886	0.00155886		0.294902	0.0150854	0.00150854
0.295902	0.0411802	0.00411802		0.295902	0.0406165	0.00406165		0.295902	0.0400786	0.00400786
0.296902	0.0705011	0.00705011		0.296902	0.0702155	0.00702155		0.296902	0.0699111	0.00699111
0.297902	0.0964046	0.00964046		0.297902	0.09624	0.009624		0.297902	0.096054	0.0096054
0.298902	0.123376	0.0123376		0.298902	0.123257	0.0123257		0.298902	0.12317	0.012317
0.299902	0.154435	0.0154435		0.299902	0.154419	0.0154419		0.299902	0.154451	0.0154451
0.3	0.159079	0.0159079		0.3	0.159069	0.0159069		0.3	0.159106	0.0159106

## Sheet: concrete
0	0	0		0	0	0		0	0	0
4.8126e-08	8.02819e-23	8.02819e-24		4.8126e-08	-2.63249e-23	-2.63249e-24		4.8126e-08	-8.32405e-23	-8.32405e-24
9.6252e-08	3.63545e-21	3.63545e-22		9.6252e-08	-1.20972e-21	-1.20972e-22		9.6252e-08	-3.8345e-21	-3.8345e-22
1.44378e-07	8.10825e-20	8.10825e-21		1.44378e-07	-2.74065e-20	-2.74065e-21		1.44378e-07	-8.70672e-20	-8.70672e-21
2.04536e-07	7.10029e-18	7.10029e-19		2.04536e-07	-2.56194e-18	-2.56194e-19		2.04536e-07	-8.18121e-18	-8.18121e-19
2.79732e-07	8.15108e-16	8.15108e-17		2.79732e-07	-3.2595e-16	-3.2595e-17		2.79732e-07	-1.04014e-15	-1.04014e-16
3.73729e-07	6.47043e-14	6.47043e-15		3.73729e-07	-2.94092e-14	-2.94092e-15		3.73729e-07	-9.28057e-14	-9.28057e-15
4.91224e-07	3.11768e-12	3.11768e-13		4.91224e-07	-1.65833e-12	-1.65833e-13		4.91224e-07	-5.11139e-12	-5.11139e-13
6.38093e-07	9.02405e-11	9.02405e-12		6.38093e-07	-5.84453e-11	-5.84453e-12		6.38093e-07	-1.73426e-10	-1.73426e-11
8.21679e-07	1.58337e-09	1.58337e-10		8.21679e-07	-1.32565e-09	-1.32565e-10		8.21679e-07	-3.72172e-09	-3.72172e-10
1.05116e-06	1.67363e-08	1.67363e-09		1.05116e-06	-2.00818e-08	-2.00818e-09		1.05116e-06	-5.22101e-08	-5.22101e-09
1.33802e-06	9.8461e-08	9.8461e-09		1.33802e-06	-2.11364e-07	-2.11364e-08		1.33802e-06	-4.95677e-07	-4.95677e-08
1.69658e-06	1.65754e-07	1.65754e-08		1.69658e-06	-1.60853e-06	-1.60853e-07		1.69658e-06	-3.30184e-06	-3.30184e-07
2.14479e-06	-2.15613e-06	-2.15613e-07		2.14479e-06	-9.18386e-06	-9.18386e-07		2.14479e-06	-1.60363e-05	-1.60363e-06
2.70505e-06	-2.12174e-05	-2.12174e-06		2.70505e-06	-4.04945e-05	-4.04945e-06		2.70505e-06	-5.91089e-05	-5.91089e-06
3.40538e-06	-0.000105505	-1.05505e-05		3.40538e-06	-0.000140599	-1.40599e-05		3.40538e-06	-0.000171932	-1.71932e-05
4.28078e-06	-0.000360755	-3.60755e-05		4.28078e-06	-0.000393368	-3.93368e-05		4.28078e-06	-0.000411882	-4.11882e-05
5.37504e-06	-0.000976388	-9.76388e-05		5.37504e-06	-0.000946201	-9.46201e-05		5.37504e-06	-0.00088346	-8.8346e-05
6.74287e-06	-0.00243216	-0.000243216		6.74287e-06	-0.00224263	-0.000224263		6.74287e-06	-0.00200185	-0.000200185
8.45265e-06	-0.00616396	-0.000616396		8.45265e-06	-0.00574336	-0.000574336		8.45265e-06	-0.00524492	-0.000524492
1.05899e-05	-0.0150141	-0.00150141		1.05899e-05	-0.0144255	-0.00144255		1.05899e-05	-0.013661	-0.0013661
1.32614e-05	-0.0312655	-0.00312655		1.32614e-05	-0.0307768	-0.00307768		1.32614e-05	-0.0298526	-0.00298526
1.66008e-05	-0.051965	-0.0051965		1.66008e-05	-0.0519521	-0.00519521		1.66008e-05	-0.0510851	-0.00510851
2.07751e-05	-0.0666385	-0.00666385		2.07751e-05	-0.0673456	-0.00673456		2.07751e-05	-0.0667738	-0.00667738
2.59929e-05	-0.0620934	-0.00620934		2.59929e-05	-0.063456	-0.0063456		2.59929e-05	-0.0633162	-0.00633162
3.25152e-05	-0.0306837	-0.00306837		3.25152e-05	-0.0323588	-0.00323588		3.25152e-05	-0.0326268	-0.00326268
4.06681e-05	0.0251713	0.00251713		4.06681e-05	0.0236338	0.00236338		4.06681e-05	0.0231164	0.00231164
5.08592e-05	0.0942455	0.00942455		5.08592e-05	0.093231	0.0093231		5.08592e-05	0.0926839	0.00926839
6.3598e-05	0.161026	0.0161026		6.3598e-05	0.160756	0.0160756		6.3598e-05	0.160384	0.0160384
7.95216e-05	0.210797	0.0210797		7.95216e-05	0.211308	0.0211308		7.95216e-05	0.211245	0.0211245
9.9426e-05	0.233659	0.0233659		9.9426e-05	0.234837	0.0234837		9.9426e-05	0.235121	0.0235121
0.000124307	0.226417	0.0226417		0.000124307	0.228058	0.0228058		0.000124307	0.228636	0.0228636
0.000155407	0.191938	0.0191938		0.000155407	0.193807	0.0193807		0.000155407	0.194564	0.0194564
0.000194283	0.136713	0.0136713		0.000194283	0.13859	0.013859		0.000194283	0.139387	0.0139387
0.000242878	0.0679599	0.00679599		0.000242878	0.0696699	0.00696699		0.000242878	0.070386	0.0070386
0.000303622	-0.00875938	-0.000875938		0.000303622	-0.00732419	-0.000732419		0.000303622	-0.00674194	-0.000674194
0.000379551	-0.0904807	-0.00904807		0.000379551	-0.0893456	-0.00893456		0.000379551	-0.0888622	-0.00888622
0.000474463	-0.174277	-0.0174277		0.000474463	-0.173412	-0.0173412		0.000474463	-0.172969	-0.0172969
0.000593103	-0.252843	-0.0252843		0.000593103	-0.252232	-0.0252232		0.000593103	-0.251878	-0.0251878
0.000741402	-0.318443	-0.0318443		0.000741402	-0.318099	-0.0318099		0.000741402	-0.317928	-0.0317928
0.000926777	-0.368052	-0.0368052		0.000926777	-0.367965	-0.0367965		0.000926777	-0.367963	-0.0367963
0.0011585	-0.413778	-0.0413778		0.0011585	-0.413836	-0.0413836		0.0011585	-0.413841	-0.0413841
0.00144814	-0.449701	-0.0449701		0.00144814	-0.44989	-0.044989		0.00144814	-0.449986	-0.0449986
0.0018102	-0.459567	-0.0459567		0.0018102	-0.459868	-0.0459868		0.0018102	-0.46005	-0.046005
0.00226278	-0.455416	-0.0455416		0.00226278	-0.455736	-0.0455736		0.00226278	-0.455916	-0.0455916
0.0028285	-0.440335	-0.0440335		0.0028285	-0.440663	-0.0440663		0.0028285	-0.440853	-0.0440853
0.00353565	-0.402549	-0.0402549		0.00353565	-0.402865	-0.0402865		0.00353565	-0.403051	-0.0403051
0.00441958	-0.346838	-0.0346838		0.00441958	-0.3471	-0.03471		0.00441958	-0.347257	-0.0347257
0.00541958	-0.280387	-0.0280387		0.00541958	-0.280585	-0.0280585		0.00541958	-0.280703	-0.0280703
0.00641958	-0.209676	-0.0209676		0.00641958	-0.20984	-0.020984		0.00641958	-0.20995	-0.020995
0.00741958	-0.137702	-0.0137702		0.00741958	-0.137819	-0.0137819		0.00741958	-0.137879	-0.0137879
0.00841958	-0.0627684	-0.00627684		0.00841958	-0.0628231	-0.00628231		0.00841958	-0.0628559	-0.00628559
0.00941958	0.00226333	0.000226333		0.00941958	0.00224703	0.000224703		0.00941958	0.00224527	0.000224527
0.0104196	0.0622367	0.00622367		0.0104196	0.0622671	0.00622671		0.0104196	0.0622808	0.00622808
0.0114196	0.0927372	0.00927372		0.0114196	0.0928579	0.00928579		0.0114196	0.0929323	0.00929323
0.0124196	0.098799	0.0098799		0.0124196	0.0988901	0.00988901		0.0124196	0.0989419	0.00989419
0.0134196	0.112474	0.0112474		0.0134196	0.112539	0.0112539		0.0134196	0.112603	0.0112603
0.0144196	0.135534	0.0135534		0.0144196	0.13562	0.013562		0.0144196	0.135656	0.0135656
0.0154196	0.130208	0.0130208		0.0154196	0.13033	0.013033		0.0154196	0.130416	0.0130416
0.0164196	0.117343	0.0117343		0.0164196	0.117435	0.0117435		0.0164196	0.117485	0.0117485
0.0174196	0.103127	0.0103127		0.0174196	0.10321	0.010321		0.0174196	0.103275	0.0103275
0.0184196	0.0951222	0.00951222		0.0184196	0.0951659	0.00951659		0.0184196	0.0951896	0.00951896
0.0194196	0.0929467	0.00929467		0.0194196	0.0929818	0.00929818		0.0194196	0.0930073	0.00930073
0.0204196	0.0939519	0.00939519		0.0204196	0.0939709	0.00939709		0.0204196	0.093996	0.0093996
0.0214196	0.100291	0.0100291		0.0214196	0.100335	0.0100335		0.0214196	0.100364	0.0100364
0.0224196	0.096903	0.0096903		0.0224196	0.0969267	0.00969267		0.0224196	0.0969484	0.00969484
0.0234196	0.102436	0.0102436		0.0234196	0.102448	0.0102448		0.0234196	0.102449	0.0102449
0.0244196	0.105497	0.0105497		0.0244196	0.105505	0.0105505		0.0244196	0.105527	0.0105527
0.0254196	0.108751	0.0108751		0.0254196	0.1088	0.01088		0.0254196	0.108826	0.0108826
0.0264196	0.0877621	0.00877621		0.0264196	0.0878083	0.00878083		0.0264196	0.0878344	0.00878344
0.0274196	0.0861107	0.00861107		0.0274196	0.0860458	0.00860458		0.0274196	0.0860106	0.00860106
0.0284196	0.098803	0.0098803		0.0284196	0.0988309	0.00988309		0.0284196	0.0988477	0.00988477
0.0294196	0.0831834	0.00831834		0.0294196	0.0832031	0.00832031		0.0294196	0.0832177	0.00832177
0.0304196	0.078948	0.0078948		0.0304196	0.0789207	0.00789207		0.0304196	0.0789072	0.00789072
0.0314196	0.0883376	0.00883376		0.0314196	0.0883043	0.00883043		0.0314196	0.0882792	0.00882792
0.0324196	0.0980442	0.00980442		0.0324196	0.0980264	0.00980264		0.0324196	0.0980214	0.00980214
0.0334196	0.0966841	0.00966841		0.0334196	0.0967112	0.00967112		0.0334196	0.0967301	0.00967301
0.0344196	0.0844931	0.00844931		0.0344196	0.0845016	0.00845016		0.0344196	0.0845024	0.00845024
0.0354196	0.0706545	0.00706545		0.0354196	0.0706584	0.00706584		0.0354196	0.0706468	0.00706468
0.0364196	0.0644691	0.00644691		0.0364196	0.0644175	0.00644175		0.0364196	0.0643955	0.00643955
0.0374196	0.0714591	0.00714591		0.0374196	0.0714581	0.00714581		0.0374196	0.071464	0.0071464
0.0384196	0.062508	0.0062508		0.0384196	0.0625206	0.00625206		0.0384196	0.0625223	0.00625223
0.0394196	0.0656002	0.00656002		0.0394196	0.0655409	0.00655409		0.0394196	0.0655059	0.00655059
0.0404196	0.0577009	0.00577009		0.0404196	0.0577638	0.00577638		0.0404196	0.0577831	0.00577831
0.0414196	0.0139488	0.00139488		0.0414196	0.0139545	0.00139545		0.0414196	0.0139645	0.00139645
0.0424196	-0.00198574	-0.000198574		0.0424196	-0.00202228	-0.000202228		0.0424196	-0.00204672	-0.000204672
0.0434196	-0.00349989	-0.000349989		0.0434196	-0.00354835	-0.000354835		0.0434196	-0.00358743	-0.000358743
0.0444196	6.68322e-07	6.68322e-08		0.0444196	-4.59953e-05	-4.59953e-06		0.0444196	-7.15921e-05	-7.15921e-06
0.0454196	-0.00468866	-0.000468866		0.0454196	-0.00468889	-0.000468889		0.0454196	-0.00468417	-0.000468417
0.0464196	-0.0167204	-0.00167204		0.0464196	-0.0167305	-0.00167305		0.0464196	-0.0167385	-0.00167385
0.0474196	-0.0387566	-0.00387566		0.0474196	-0.0387391	-0.00387391		0.0474196	-0.0387567	-0.00387567
0.0484196	-0.0478576	-0.00478576		0.0484196	-0.0479551	-0.00479551		0.0484196	-0.0479987	-0.00479987
0.0494196	-0.0221336	-0.00221336		0.0494196	-0.0221742	-0.00221742		0.0494196	-0.0221837	-0.00221837
0.0504196	0.00408622	0.000408622		0.0504196	0.00405237	0.000405237		0.0504196	0.00404411	0.000404411
0.0514196	0.0128758	0.00128758		0.0514196	0.0129371	0.00129371		0.0514196	0.0129496	0.00129496
0.0524196	-0.00642203	-0.000642203		0.0524196	-0.00641022	-0.000641022		0.0524196	-0.00640115	-0.000640115
0.0534196	-0.001444	-0.0001444		0.0534196	-0.00146639	-0.000146639		0.0534196	-0.00145502	-0.000145502
0.0544196	0.0106496	0.00106496		0.0544196	0.0106725	0.00106725		0.0544196	0.010686	0.0010686
0.0554196	-0.00988786	-0.000988786		0.0554196	-0.00980808	-0.000980808		0.0554196	-0.00978441	-0.000978441
0.0564196	-0.0262079	-0.00262079		0.0564196	-0.0262384	-0.00262384		0.0564196	-0.0262456	-0.00262456
0.0574196	-0.0431803	-0.00431803		0.0574196	-0.0431217	-0.00431217		0.0574196	-0.0430845	-0.00430845
0.0584196	-0.0473599	-0.00473599		0.0584196	-0.0474478	-0.00474478		0.0584196	-0.0474795	-0.00474795
0.0594196	-0.0166534	-0.00166534		0.0594196	-0.016641	-0.0016641		0.0594196	-0.0166514	-0.00166514
0.0604196	-0.0356061	-0.00356061		0.0604196	-0.0355339	-0.00355339		0.0604196	-0.0354935	-0.00354935
0.0614196	-0.0546095	-0.00546095		0.0614196	-0.0546316	-0.00546316		0.0614196	-0.0546248	-0.00546248
0.0624196	-0.0379842	-0.00379842		0.0624196	-0.0380392	-0.00380392		0.0624196	-0.0380598	-0.00380598
0.0634196	-0.0391329	-0.00391329		0.0634196	-0.0390807	-0.00390807		0.0634196	-0.039081	-0.0039081
0.0644196	-0.0638282	-0.00638282		0.0644196	-0.0638053	-0.00638053		0.0644196	-0.0637852	-0.00637852
0.0654196	-0.0609063	-0.00609063		0.0654196	-0.0609383	-0.00609383		0.0654196	-0.0609323	-0.00609323
0.0664196	-0.0549132	-0.00549132		0.0664196	-0.0549473	-0.00549473		0.0664196	-0.0549689	-0.00549689
0.0674196	-0.0526133	-0.00526133		0.0674196	-0.0526377	-0.00526377		0.0674196	-0.052671	-0.0052671
0.0684196	-0.0343745	-0.00343745		0.0684196	-0.034364	-0.0034364		0.0684196	-0.0343461	-0.00343461
0.0694196	-0.0478887	-0.00478887		0.0694196	-0.0478075	-0.00478075		0.0694196	-0.0477475	-0.00477475
0.0704196	-0.0888144	-0.00888144		0.0704196	-0.088867	-0.0088867		0.0704196	-0.0889033	-0.00889033
0.0714196	-0.079288	-0.0079288		0.0714196	-0.0794112	-0.00794112		0.0714196	-0.0795018	-0.00795018
0.0724196	-0.0364222	-0.00364222		0.0724196	-0.0364167	-0.00364167		0.0724196	-0.0363993	-0.00363993
0.0734196	-0.0679294	-0.00679294		0.0734196	-0.0677904	-0.00677904		0.0734196	-0.0677046	-0.00677046
0.0744196	-0.0586102	-0.00586102		0.0744196	-0.0588125	-0.00588125		0.0744196	-0.0588984	-0.00588984
0.0754196	-0.0627497	-0.00627497		0.0754196	-0.0627254	-0.00627254		0.0754196	-0.0627756	-0.00627756
0.0764196	-0.0179598	-0.00179598		0.0764196	-0.0180963	-0.00180963		0.0764196	-0.0181267	-0.00181267
0.0774196	-0.029869	-0.0029869		0.0774196	-0.0295801	-0.00295801		0.0774196	-0.029425	-0.0029425
0.0784196	-0.0200823	-0.00200823		0.0784196	-0.0203456	-0.00203456		0.0784196	-0.0204391	-0.00204391
0.0794196	0.0483969	0.00483969		0.0794196	0.048381	0.0048381		0.0794196	0.0483133	0.00483133
0.0804196	0.00381806	0.000381806		0.0804196	0.00391644	0.000391644		0.0804196	0.00397944	0.000397944
0.0814196	-0.00945043	-0.000945043		0.0814196	-0.00934021	-0.000934021		0.0814196	-0.00924318	-0.000924318
0.0824196	0.0150997	0.00150997		0.0824196	0.0150172	0.00150172		0.0824196	0.0150039	0.00150039
0.0834196	0.0686718	0.00686718		0.0834196	0.0685136	0.00685136		0.0834196	0.0683921	0.00683921
0.0844196	0.0401495	0.00401495		0.0844196	0.0402705	0.00402705		0.0844196	0.0403202	0.00403202
0.0854196	-0.019602	-0.0019602		0.0854196	-0.0194554	-0.00194554		0.0854196	-0.0193335	-0.00193335
0.0864196	0.000112681	1.12681e-05		0.0864196	4.27541e-05	4.27541e-06		0.0864196	5.01123e-05	5.01123e-06
0.0874196	-0.0364295	-0.00364295		0.0874196	-0.0365731	-0.00365731		0.0874196	-0.0366957	-0.00366957
0.0884196	0.0843217	0.00843217		0.0884196	0.0840314	0.00840314		0.0884196	0.0838731	0.00838731
0.0894196	0.111444	0.0111444		0.0894196	0.111882	0.0111882		0.0894196	0.112126	0.0112126
0.0904196	0.0248669	0.00248669		0.0904196	0.0249493	0.00249493		0.0904196	0.0250815	0.00250815
0.0914196	0.0138222	0.00138222		0.0914196	0.013631	0.0013631		0.0914196	0.013505	0.0013505
0.0924196	0.0416092	0.00416092		0.0924196	0.0413537	0.00413537		0.0924196	0.0411747	0.00411747
0.0934196	0.0104657	0.00104657		0.0934196	0.0106474	0.00106474		0.0934196	0.0107407	0.00107407
0.0944196	-0.0209804	-0.00209804		0.0944196	-0.0208365	-0.00208365		0.0944196	-0.0206537	-0.00206537
0.0954196	-0.0136853	-0.00136853		0.0954196	-0.0138198	-0.00138198		0.0954196	-0.0138569	-0.00138569
0.0964196	0.0292013	0.00292013		0.0964196	0.028768	0.0028768		0.0964196	0.0284524	0.00284524
0.0974196	-0.0100088	-0.00100088		0.0974196	-0.00998424	-0.000998424		0.0974196	-0.0100243	-0.00100243
0.0984196	0.0112162	0.00112162		0.0984196	0.0115181	0.00115181		0.0984196	0.0118158	0.00118158
0.0994196	0.0101213	0.00101213		0.0994196	0.0102914	0.00102914		0.0994196	0.0104994	0.00104994
0.10042	0.0578243	0.00578243		0.10042	0.0571703	0.00571703		0.10042	0.0567081	0.00567081
0.10142	0.0410036	0.00410036		0.10142	0.0407841	0.00407841		0.10142	0.0405167	0.00405167
0.10242	-0.0299537	-0.00299537		0.10242	-0.0294296	-0.00294296		0.10242	-0.0289642	-0.00289642
0.10342	0.11502	0.011502		0.10342	0.11552	0.011552		0.10342	0.11599	0.011599
0.10442	0.00422584	0.000422584		0.10442	0.003559	0.0003559		0.10442	0.00310691	0.000310691
0.10542	-0.0115027	-0.00115027		0.10542	-0.0124978	-0.00124978		0.10542	-0.0132866	-0.00132866
0.10642	-0.0767537	-0.00767537		0.10642	-0.0760433	-0.00760433		0.10642	-0.0754879	-0.00754879
0.10742	0.119121	0.0119121		0.10742	0.120231	0.0120231		0.10742	0.121173	0.0121173
0.10842	0.02082	0.002082		0.10842	0.0200447	0.00200447		0.10842	0.0195418	0.00195418
0.10942	0.0683139	0.00683139		0.10942	0.0666397	0.00666397		0.10942	0.0653139	0.00653139
0.11042	0.0896291	0.00896291		0.11042	0.090698	0.0090698		0.11042	0.0913726	0.00913726
0.11142	0.0804593	0.00804593		0.11142	0.0823322	0.00823322		0.11142	0.0838818	0.00838818
0.11242	0.0032864	0.00032864		0.11242	0.0024082	0.00024082		0.11242	0.00192567	0.000192567
0.11342	-0.062823	-0.0062823		0.11342	-0.0654796	-0.00654796		0.11342	-0.0673678	-0.00673678
0.11442	0.00663744	0.000663744		0.11442	0.00723286	0.000723286		0.11442	0.00753162	0.000753162
0.11542	-0.0748007	-0.00748007		0.11542	-0.0720974	-0.00720974		0.11542	-0.069943	-0.0069943
0.11642	0.0215914	0.00215914		0.11642	0.0209813	0.00209813		0.11642	0.0206812	0.00206812
0.11742	-0.0722375	-0.00722375		0.11742	-0.0757778	-0.00757778		0.11742	-0.078148	-0.0078148
0.11842	0.0919848	0.00919848		0.11842	0.0922701	0.00922701		0.11842	0.0921612	0.00921612
0.11942	-0.170906	-0.0170906		0.11942	-0.167658	-0.0167658		0.11942	-0.165158	-0.0165158
0.12042	0.110979	0.0110979		0.12042	0.111237	0.0111237		0.12042	0.111366	0.0111366
0.12142	-0.0779941	-0.00779941		0.12142	-0.0821121	-0.00821121		0.12142	-0.0844706	-0.00844706
0.12242	0.177638	0.0177638		0.12242	0.177281	0.0177281		0.12242	0.176485	0.0176485
0.12342	-0.0441953	-0.00441953		0.12342	-0.0407396	-0.00407396		0.12342	-0.0386545	-0.00386545
0.12442	-0.00727	-0.000727		0.12442	-0.00652905	-0.000652905		0.12442	-0.00592209	-0.000592209
0.12542	-0.148518	-0.0148518		0.12542	-0.152082	-0.0152082		0.12542	-0.153442	-0.0153442
0.12642	0.017133	0.0017133		0.12642	0.0152232	0.00152232		0.12642	0.013602	0.0013602
0.12742	-0.146955	-0.0146955		0.12742	-0.145663	-0.0145663		0.12742	-0.146018	-0.0146018
0.12842	-0.0721794	-0.00721794		0.12842	-0.0705325	-0.00705325		0.12842	-0.0696249	-0.00696249
0.12942	-0.036963	-0.0036963		0.12942	-0.0368629	-0.00368629		0.12942	-0.0347633	-0.00347633
0.13042	-0.0477599	-0.00477599		0.13042	-0.0505509	-0.00505509		0.13042	-0.0521633	-0.00521633
0.13142	0.0674675	0.00674675		0.13142	0.0643275	0.00643275		0.13142	0.0590148	0.00590148
0.13242	-0.210846	-0.0210846		0.13242	-0.210459	-0.0210459		0.13242	-0.210214	-0.0210214
0.13342	0.0473567	0.00473567		0.13342	0.055993	0.0055993		0.13342	0.0663253	0.00663253
0.13442	-0.330662	-0.0330662		0.13442	-0.333009	-0.0333009		0.13442	-0.331266	-0.0331266
0.13542	0.20101	0.020101		0.13542	0.187081	0.0187081		0.13542	0.173945	0.0173945
0.13642	-0.153493	-0.0153493		0.13642	-0.157201	-0.0157201		0.13642	-0.157368	-0.0157368
0.13742	0.151509	0.0151509		0.13742	0.180565	0.0180565		0.13742	0.20923	0.020923
0.13842	-0.212008	-0.0212008		0.13842	-0.205276	-0.0205276		0.13842	-0.184075	-0.0184075
0.13942	0.261293	0.0261293		0.13942	0.215894	0.0215894		0.13942	0.209287	0.0209287
0.14042	-0.0688988	-0.00688988		0.14042	-0.0713768	-0.00713768		0.14042	-0.0587659	-0.00587659
0.14142	-0.329624	-0.0329624		0.14142	-0.190998	-0.0190998		0.14142	-0.142625	-0.0142625
0.14242	0.108901	0.0108901		0.14242	0.267731	0.0267731		0.14242	0.302318	0.0302318
0.14342	-0.320239	-0.0320239		0.14342	-0.320778	-0.0320778		0.14342	-0.308574	-0.0308574
0.14442	0.452664	0.0452664		0.14442	0.441576	0.0441576		0.14442	0.430176	0.0430176
0.14542	-0.08858	-0.008858		0.14542	-0.0879058	-0.00879058		0.14542	-0.060211	-0.0060211
0.14642	0.0301173	0.00301173		0.14642	0.0423143	0.00423143		0.14642	0.0506682	0.00506682
0.14742	0.097542	0.0097542		0.14742	0.0403498	0.00403498		0.14742	0.0119022	0.00119022
0.14842	0.15876	0.015876		0.14842	0.118477	0.0118477		0.14842	0.0879242	0.00879242
0.14942	-0.0383864	-0.00383864		0.14942	-0.0881698	-0.00881698		0.14942	-0.112407	-0.0112407
0.15042	0.187715	0.0187715		0.15042	0.140154	0.0140154		0.15042	0.101766	0.0101766
0.15142	-0.0680371	-0.00680371		0.15142	-0.111656	-0.0111656		0.15142	-0.138828	-0.0138828
0.15242	0.157647	0.0157647		0.15242	0.0941227	0.00941227		0.15242	0.0492021	0.00492021
0.15342	-0.161467	-0.0161467		0.15342	-0.222532	-0.0222532		0.15342	-0.261054	-0.0261054
0.15442	0.45993	0.045993		0.15442	0.373784	0.0373784		0.15442	0.309012	0.0309012
0.15542	-0.00554592	-0.000554592		0.15542	-0.0147466	-0.00147466		0.15542	-0.0140978	-0.00140978
0.15642	0.306377	0.0306377		0.15642	0.251158	0.0251158		0.15642	0.229564	0.0229564
0.15742	-0.22089	-0.022089		0.15742	-0.291456	-0.0291456		0.15742	-0.300405	-0.0300405
0.15842	0.61877	0.061877		0.15842	0.564261	0.0564261		0.15842	0.541919	0.0541919
0.15942	-0.515361	-0.0515361		0.15942	-0.373871	-0.0373871		0.15942	-0.314617	-0.0314617
0.16042	0.183585	0.0183585		0.16042	0.320298	0.0320298		0.16042	0.335767	0.0335767
0.16142	-0.0665033	-0.00665033		0.16142	-0.0554204	-0.00554204		0.16142	-0.0421115	-0.00421115
0.16242	0.107872	0.0107872		0.16242	0.127186	0.0127186		0.16242	0.13167	0.013167
0.16342	-0.0960357	-0.00960357		0.16342	-0.057178	-0.0057178		0.16342	-0.0118878	-0.00118878
0.16442	0.0386261	0.00386261		0.16442	0.062544	0.0062544		0.16442	0.0833939	0.00833939
0.16542	-0.180816	-0.0180816		0.16542	-0.193207	-0.0193207		0.16542	-0.191407	-0.0191407
0.16642	0.396544	0.0396544		0.16642	0.404514	0.0404514		0.16642	0.405144	0.0405144
0.16742	-0.173363	-0.0173363		0.16742	-0.163178	-0.0163178		0.16742	-0.146054	-0.0146054
0.16842	0.0934072	0.00934072		0.16842	0.0951442	0.00951442		0.16842	0.0981767	0.00981767
0.16942	-0.0444254	-0.00444254		0.16942	-0.0509074	-0.00509074		0.16942	-0.0523828	-0.00523828
0.17042	0.283963	0.0283963		0.17042	0.289899	0.0289899		0.17042	0.290539	0.0290539
0.17142	-0.218644	-0.0218644		0.17142	-0.218349	-0.0218349		0.17142	-0.21379	-0.021379
0.17242	0.344865	0.0344865		0.17242	0.342658	0.0342658		0.17242	0.340419	0.0340419
0.17342	-0.181628	-0.0181628		0.17342	-0.183102	-0.0183102		0.17342	-0.183064	-0.0183064
0.17442	0.252398	0.0252398		0.17442	0.257887	0.0257887		0.17442	0.259593	0.0259593
0.17542	-0.200127	-0.0200127		0.17542	-0.204201	-0.0204201		0.17542	-0.204845	-0.0204845
0.17642	0.254757	0.0254757		0.17642	0.25193	0.025193		0.17642	0.249023	0.0249023
0.17742	-0.0409689	-0.00409689		0.17742	-0.038411	-0.0038411		0.17742	-0.03629	-0.003629
0.17842	-0.0575221	-0.00575221		0.17842	-0.0546366	-0.00546366		0.17842	-0.0531324	-0.00531324
0.17942	-0.13021	-0.013021		0.17942	-0.13513	-0.013513		0.17942	-0.137666	-0.0137666
0.18042	0.0551439	0.00551439		0.18042	0.0528812	0.00528812		0.18042	0.0508266	0.00508266
0.18142	0.0334022	0.00334022		0.18142	0.037645	0.0037645		0.18142	0.0406266	0.00406266
0.18242	0.0389785	0.00389785		0.18242	0.0404082	0.00404082		0.18242	0.0413402	0.00413402
0.18342	0.0780644	0.00780644		0.18342	0.0736003	0.00736003		0.18342	0.0707373	0.00707373
0.18442	-0.106546	-0.0106546		0.18442	-0.107499	-0.0107499		0.18442	-0.108216	-0.0108216
0.18542	0.0818574	0.00818574		0.18542	0.0855987	0.00855987		0.18542	0.0881961	0.00881961
0.18642	0.0327331	0.00327331		0.18642	0.0328676	0.00328676		0.18642	0.0331354	0.00331354
0.18742	0.0458706	0.00458706		0.18742	0.0421928	0.00421928		0.18742	0.0396924	0.00396924
0.18842	-0.133824	-0.0133824		0.18842	-0.133505	-0.0133505		0.18842	-0.133298	-0.0133298
0.18942	0.0354969	0.00354969		0.18942	0.038027	0.0038027		0.18942	0.039882	0.0039882
0.19042	-0.0534479	-0.00534479		0.19042	-0.0541172	-0.00541172		0.19042	-0.0543786	-0.00543786
0.19142	0.0238346	0.00238346		0.19142	0.021234	0.0021234		0.19142	0.0193725	0.00193725
0.19242	0.0194223	0.00194223		0.19242	0.0206416	0.00206416		0.19242	0.0213848	0.00213848
0.19342	0.0197649	0.00197649		0.19342	0.0212566	0.00212566		0.19342	0.0224631	0.00224631
0.19442	-0.0840637	-0.00840637		0.19442	-0.0851855	-0.00851855		0.19442	-0.0858141	-0.00858141
0.19542	-0.0501604	-0.00501604		0.19542	-0.0516212	-0.00516212		0.19542	-0.0526606	-0.00526606
0.19642	-0.0439441	-0.00439441		0.19642	-0.0428133	-0.00428133		0.19642	-0.042082	-0.0042082
0.19742	-0.00869346	-0.000869346		0.19742	-0.0080509	-0.00080509		0.19742	-0.00747317	-0.000747317
0.19842	0.00775939	0.000775939		0.19842	0.00673827	0.000673827		0.19842	0.00607498	0.000607498
0.19942	-0.174463	-0.0174463		0.19942	-0.174973	-0.0174973		0.19942	-0.175301	-0.0175301
0.20042	-0.0394108	-0.00394108		0.20042	-0.0387454	-0.00387454		0.20042	-0.0382993	-0.00382993
0.20142	-0.0580976	-0.00580976		0.20142	-0.0578141	-0.00578141		0.20142	-0.0575625	-0.00575625
0.20242	-0.0230603	-0.00230603		0.20242	-0.0240862	-0.00240862		0.20242	-0.0247365	-0.00247365
0.20342	-0.0387149	-0.00387149		0.20342	-0.0385121	-0.00385121		0.20342	-0.0383992	-0.00383992
0.20442	-0.0817496	-0.00817496		0.20442	-0.0812207	-0.00812207		0.20442	-0.0808317	-0.00808317
0.20542	-0.0684886	-0.00684886		0.20542	-0.0687589	-0.00687589		0.20542	-0.0689299	-0.00689299
0.20642	-0.0161338	-0.00161338		0.20642	-0.0167308	-0.00167308		0.20642	-0.0170941	-0.00170941
0.20742	-0.0722323	-0.00722323		0.20742	-0.0718284	-0.00718284		0.20742	-0.0715521	-0.00715521
0.20842	-0.0293013	-0.00293013		0.20842	-0.0290969	-0.00290969		0.20842	-0.0289261	-0.00289261
0.20942	-0.00396345	-0.000396345		0.20942	-0.00425639	-0.000425639		0.20942	-0.00450046	-0.000450046
0.21042	0.0174394	0.00174394		0.21042	0.017131	0.0017131		0.21042	0.016986	0.0016986
0.21142	-0.0489526	-0.00489526		0.21142	-0.0484139	-0.00484139		0.21142	-0.0480447	-0.00480447
0.21242	-0.00211784	-0.000211784		0.21242	-0.00222329	-0.000222329		0.21242	-0.00225764	-0.000225764
0.21342	-0.0222032	-0.00222032		0.21342	-0.0223864	-0.00223864		0.21342	-0.0225977	-0.00225977
0.21442	-0.0309578	-0.00309578		0.21442	-0.0311728	-0.00311728		0.21442	-0.0312185	-0.00312185
0.21542	-0.0274013	-0.00274013		0.21542	-0.026955	-0.0026955		0.21542	-0.0266431	-0.00266431
0.21642	-0.03977	-0.003977		0.21642	-0.0399277	-0.00399277		0.21642	-0.0400358	-0.00400358
0.21742	0.00157468	0.000157468		0.21742	0.00128567	0.000128567		0.21742	0.00104144	0.000104144
0.21842	-0.039652	-0.0039652		0.21842	-0.0395321	-0.00395321		0.21842	-0.0393984	-0.00393984
0.21942	-0.0651938	-0.00651938		0.21942	-0.0649977	-0.00649977		0.21942	-0.0648189	-0.00648189
0.22042	-0.00495803	-0.000495803		0.22042	-0.00519235	-0.000519235		0.22042	-0.00537003	-0.000537003
0.22142	0.0328984	0.00328984		0.22142	0.0327526	0.00327526		0.22142	0.0326074	0.00326074
0.22242	0.0201536	0.00201536		0.22242	0.0203105	0.00203105		0.22242	0.020489	0.0020489
0.22342	0.0179756	0.00179756		0.22342	0.0181386	0.00181386		0.22342	0.0182766	0.00182766
0.22442	0.0022918	0.00022918		0.22442	0.00216915	0.000216915		0.22442	0.00202735	0.000202735
0.22542	-0.0149686	-0.00149686		0.22542	-0.0150853	-0.00150853		0.22542	-0.0151886	-0.00151886
0.22642	0.0256014	0.00256014		0.22642	0.0256321	0.00256321		0.22642	0.0257488	0.00257488
0.22742	0.0331776	0.00331776		0.22742	0.033347	0.0033347		0.22742	0.0334607	0.00334607
0.22842	0.000253395	2.53395e-05		0.22842	0.000125552	1.25552e-05		0.22842	-1.88792e-05	-1.88792e-06
0.22942	-0.00309812	-0.000309812		0.22942	-0.00316421	-0.000316421		0.22942	-0.00321681	-0.000321681
0.23042	0.0052073	0.00052073		0.23042	0.00527503	0.000527503		0.23042	0.00538973	0.000538973
0.23142	0.00453445	0.000453445		0.23142	0.00457475	0.000457475		0.23142	0.0046084	0.00046084
0.23242	0.0194619	0.00194619		0.23242	0.0193194	0.00193194		0.23242	0.0191815	0.00191815
0.23342	0.0237245	0.00237245		0.23342	0.0237558	0.00237558		0.23342	0.0237629	0.00237629
0.23442	0.0197323	0.00197323		0.23442	0.0197718	0.00197718		0.23442	0.0198694	0.00198694
0.23542	0.0199319	0.00199319		0.23542	0.0199619	0.00199619		0.23542	0.0199695	0.00199695
0.23642	0.0297448	0.00297448		0.23642	0.0296377	0.00296377		0.23642	0.0295355	0.00295355
0.23742	0.012573	0.0012573		0.23742	0.0126695	0.00126695		0.23742	0.0127066	0.00127066
0.23842	0.015144	0.0015144		0.23842	0.0150604	0.00150604		0.23842	0.0150975	0.00150975
0.23942	0.064281	0.0064281		0.23942	0.0642957	0.00642957		0.23942	0.0642933	0.00642933
0.24042	0.0667388	0.00667388		0.24042	0.0667428	0.00667428		0.24042	0.066702	0.0066702
0.24142	0.0565768	0.00565768		0.24142	0.0566272	0.00566272		0.24142	0.0566666	0.00566666
0.24242	0.00768921	0.000768921		0.24242	0.00779142	0.000779142		0.24242	0.00787291	0.000787291
0.24342	-0.0133322	-0.00133322		0.24342	-0.0134246	-0.00134246		0.24342	-0.0134746	-0.00134746
0.24442	-0.00770317	-0.000770317		0.24442	-0.00769946	-0.000769946		0.24442	-0.00774809	-0.000774809
0.24542	-0.0109976	-0.00109976		0.24542	-0.0110658	-0.00110658		0.24542	-0.0110819	-0.00110819
0.24642	0.0120415	0.00120415		0.24642	0.0120217	0.00120217		0.24642	0.0120516	0.00120516
0.24742	0.0247242	0.00247242		0.24742	0.024727	0.0024727		0.24742	0.0247166	0.00247166
0.24842	0.0349759	0.00349759		0.24842	0.034968	0.0034968		0.24842	0.0349338	0.00349338
0.24942	0.0326167	0.00326167		0.24942	0.0326411	0.00326411		0.24942	0.032669	0.0032669
0.25042	0.0173562	0.00173562		0.25042	0.0173788	0.00173788		0.25042	0.0174168	0.00174168
0.25142	0.00510729	0.000510729		0.25142	0.00512244	0.000512244		0.25142	0.00511633	0.000511633
0.25242	0.00872017	0.000872017		0.25242	0.00868282	0.000868282		0.25242	0.00864114	0.000864114
0.25342	0.015556	0.0015556		0.25342	0.0155488	0.00155488		0.25342	0.0155567	0.00155567
0.25442	0.0133292	0.00133292		0.25442	0.0133295	0.00133295		0.25442	0.0133593	0.00133593
0.25542	0.00897047	0.000897047		0.25542	0.00900787	0.000900787		0.25542	0.00900787	0.000900787
0.25642	0.0295526	0.00295526		0.25642	0.0294544	0.00294544		0.25642	0.0294018	0.00294018
0.25742	0.0316103	0.00316103		0.25742	0.0317362	0.00317362		0.25742	0.0317912	0.00317912
0.25842	-0.0216722	-0.00216722		0.25842	-0.0216774	-0.00216774		0.25842	-0.021651	-0.0021651
0.25942	-0.00490379	-0.000490379		0.25942	-0.00496661	-0.000496661		0.25942	-0.00500908	-0.000500908
0.26042	0.0117915	0.00117915		0.26042	0.0118066	0.00118066		0.26042	0.0117954	0.00117954
0.26142	-0.0211572	-0.00211572		0.26142	-0.0210916	-0.00210916		0.26142	-0.0210615	-0.00210615
0.26242	-0.0587241	-0.00587241		0.26242	-0.0587633	-0.00587633		0.26242	-0.0587624	-0.00587624
0.26342	-0.0556955	-0.00556955		0.26342	-0.0557099	-0.00557099		0.26342	-0.0557356	-0.00557356
0.26442	-0.0557007	-0.00557007		0.26442	-0.0557552	-0.00557552		0.26442	-0.0558009	-0.00558009
0.26542	-0.0360811	-0.00360811		0.26542	-0.0361636	-0.00361636		0.26542	-0.0361929	-0.00361929
0.26642	-0.0165168	-0.00165168		0.26642	-0.0165069	-0.00165069		0.26642	-0.0164857	-0.00164857
0.26742	0.000588721	5.88721e-05		0.26742	0.000570574	5.70574e-05		0.26742	0.000554205	5.54205e-05
0.26842	0.0204105	0.00204105		0.26842	0.0204127	0.00204127		0.26842	0.0203985	0.00203985
0.26942	0.0111622	0.00111622		0.26942	0.011218	0.0011218		0.26942	0.011255	0.0011255
0.27042	0.000729779	7.29779e-05		0.27042	0.000712923	7.12923e-05		0.27042	0.000724736	7.24736e-05
0.27142	0.0193076	0.00193076		0.27142	0.0193269	0.00193269		0.27142	0.019327	0.0019327
0.27242	0.00728395	0.000728395		0.27242	0.00734004	0.000734004		0.27242	0.0073508	0.00073508
0.27342	-0.0109891	-0.00109891		0.27342	-0.0110234	-0.00110234		0.27342	-0.0110243	-0.00110243
0.27442	-0.0129629	-0.00129629		0.27442	-0.0129149	-0.00129149		0.27442	-0.0128852	-0.00128852
0.27542	-0.0188247	-0.00188247		0.27542	-0.0188677	-0.00188677		0.27542	-0.0188914	-0.00188914
0.27642	0.00486793	0.000486793		0.27642	0.00483348	0.000483348		0.27642	0.00480263	0.000480263
0.27742	0.0124982	0.00124982		0.27742	0.0124981	0.00124981		0.27742	0.0125116	0.00125116
0.27842	0.0145693	0.00145693		0.27842	0.0146078	0.00146078		0.27842	0.0146358	0.00146358
0.27942	0.00120198	0.000120198		0.27942	0.00124648	0.000124648		0.27942	0.00125689	0.000125689
0.28042	-0.00521265	-0.000521265		0.28042	-0.00525931	-0.000525931		0.28042	-0.00528661	-0.000528661
0.28142	-0.000736392	-7.36392e-05		0.28142	-0.000712283	-7.12283e-05		0.28142	-0.000697065	-6.97065e-05
0.28242	-0.0141591	-0.00141591		0.28242	-0.0141464	-0.00141464		0.28242	-0.0141289	-0.00141289
0.28342	-0.0121015	-0.00121015		0.28342	-0.0121214	-0.00121214		0.28342	-0.0121414	-0.00121414
0.28442	-0.00932503	-0.000932503		0.28442	-0.00932911	-0.000932911		0.28442	-0.00934059	-0.000934059
0.28542	-0.0147908	-0.00147908		0.28542	-0.0147987	-0.00147987		0.28542	-0.0147955	-0.00147955
0.28642	-0.015688	-0.0015688		0.28642	-0.0156827	-0.00156827		0.28642	-0.0156744	-0.00156744
0.28742	-0.0240339	-0.00240339		0.28742	-0.0239983	-0.00239983		0.28742	-0.0239929	-0.00239929
0.28842	-0.0384245	-0.00384245		0.28842	-0.038473	-0.0038473		0.28842	-0.0385036	-0.00385036
0.28942	-0.0210143	-0.00210143		0.28942	-0.0210775	-0.00210775		0.28942	-0.0211022	-0.00211022
0.29042	-0.00513462	-0.000513462		0.29042	-0.00511043	-0.000511043		0.29042	-0.0050946	-0.00050946
0.29142	-0.00862509	-0.000862509		0.29142	-0.00861696	-0.000861696		0.29142	-0.00862189	-0.000862189
0.29242	-0.00481484	-0.000481484		0.29242	-0.00486135	-0.000486135		0.29242	-0.00488705	-0.000488705
0.29342	0.0140716	0.00140716		0.29342	0.0140627	0.00140627		0.29342	0.0140591	0.00140591
0.29442	0.0202467	0.00202467		0.29442	0.0202461	0.00202461		0.29442	0.0202613	0.00202613
0.29542	0.0486455	0.00486455		0.29542	0.0485859	0.00485859		0.29542	0.0485431	0.00485431
0.29642	0.0774727	0.00774727		0.29642	0.0774962	0.00774962		0.29642	0.077516	0.0077516
0.29742	0.0898658	0.00898658		0.29742	0.0898686	0.00898686		0.29742	0.0898707	0.00898707
0.29842	0.109554	0.0109554		0.29842	0.10957	0.010957		0.29842	0.109599	0.0109599
0.29942	0.132648	0.0132648		0.29942	0.132659	0.0132659		0.29942	0.132659	0.0132659
0.3	0.147192	0.0147192		0.3	0.147199	0.0147199		0.3	0.147207	0.0147207

## Sheet: asphalt_damage
0	0	0		0	0	0		0	0	0
4.1231e-07	-1.09431e-31	-1.09431e-32		4.1231e-07	-6.95566e-31	-6.95566e-32		4.1231e-07	3.14433e-30	3.14433e-31
8.24619e-07	-7.10464e-30	-7.10464e-31		8.24619e-07	-4.21218e-29	-4.21218e-30		8.24619e-07	1.86976e-28	1.86976e-29
1.23693e-06	-2.2647e-28	-2.2647e-29		1.23693e-06	-1.26402e-27	-1.26402e-28		1.23693e-06	5.51029e-27	5.51029e-28
1.75232e-06	-8.70865e-26	-8.70865e-27		1.75232e-06	-4.03782e-25	-4.03782e-26		1.75232e-06	1.61704e-24	1.61704e-25
2.39655e-06	-5.75174e-23	-5.75174e-24		2.39655e-06	-2.47902e-22	-2.47902e-23		2.39655e-06	9.04776e-22	9.04776e-23
3.20184e-06	-2.26858e-20	-2.26858e-21		3.20184e-06	-1.02938e-19	-1.02938e-20		3.20184e-06	3.49234e-19	3.49234e-20
4.20846e-06	-4.57505e-18	-4.57505e-19		4.20846e-06	-2.45385e-17	-2.45385e-18		4.20846e-06	7.89616e-17	7.89616e-18
5.46673e-06	-4.45757e-16	-4.45757e-17		5.46673e-06	-3.343e-15	-3.343e-16		5.46673e-06	1.04049e-14	1.04049e-15
7.03956e-06	-1.65001e-14	-1.65001e-15		7.03956e-06	-2.67557e-13	-2.67557e-14		7.03956e-06	8.21462e-13	8.21462e-14
9.00561e-06	3.94058e-13	3.94058e-14		9.00561e-06	-1.30136e-11	-1.30136e-12		9.00561e-06	4.02278e-11	4.02278e-12
1.14632e-05	5.8322e-11	5.8322e-12		1.14632e-05	-3.97523e-10	-3.97523e-11		1.14632e-05	1.26489e-09	1.26489e-10
1.45351e-05	2.31802e-09	2.31802e-10		1.45351e-05	-7.85325e-09	-7.85325e-10		1.45351e-05	2.63662e-08	2.63662e-09
1.8375e-05	5.02363e-08	5.02363e-09		1.8375e-05	-1.02847e-07	-1.02847e-08		1.8375e-05	3.74911e-07	3.74911e-08
2.3175e-05	6.81575e-07	6.81575e-08		2.3175e-05	-9.1042e-07	-9.1042e-08		2.3175e-05	3.72856e-06	3.72856e-07
2.91748e-05	6.15609e-06	6.15609e-07		2.91748e-05	-5.52416e-06	-5.52416e-07		2.91748e-05	2.6492e-05	2.6492e-06
3.66747e-05	3.83145e-05	3.83145e-06		3.66747e-05	-2.32159e-05	-2.32159e-06		3.66747e-05	0.00013679	1.3679e-05
4.60496e-05	0.000167037	1.67037e-05		4.60496e-05	-6.89932e-05	-6.89932e-06		4.60496e-05	0.000519047	5.19047e-05
5.77681e-05	0.000505521	5.05521e-05		5.77681e-05	-0.000160032	-1.60032e-05		5.77681e-05	0.0014474	0.00014474
7.24163e-05	0.000980684	9.80684e-05		7.24163e-05	-0.000400546	-4.00546e-05		7.24163e-05	0.00288377	0.000288377
9.07265e-05	0.000692648	6.92648e-05		9.07265e-05	-0.00137936	-0.000137936		9.07265e-05	0.00359087	0.000359087
0.000113614	-0.00275772	-0.000275772		0.000113614	-0.00483063	-0.000483063		0.000113614	0.000469195	4.69195e-05
0.000142224	-0.0126735	-0.00126735		0.000142224	-0.013511	-0.0013511		0.000142224	-0.0104059	-0.00104059
0.000177986	-0.0303151	-0.00303151		0.000177986	-0.0288309	-0.00288309		0.000177986	-0.0303484	-0.00303484
0.000222689	-0.0512042	-0.00512042		0.000222689	-0.0471499	-0.00471499		0.000222689	-0.0543563	-0.00543563
0.000278567	-0.0650837	-0.00650837		0.000278567	-0.0590924	-0.00590924		0.000278567	-0.071449	-0.0071449
0.000348415	-0.0613904	-0.00613904		0.000348415	-0.0544555	-0.00544555		0.000348415	-0.0703896	-0.00703896
0.000435725	-0.0359468	-0.00359468		0.000435725	-0.028886	-0.0028886		0.000435725	-0.0464455	-0.00464455
0.000544863	0.00487749	0.000487749		0.000544863	0.0117195	0.00117195		0.000544863	-0.00580469	-0.000580469
0.000681284	0.0393423	0.00393423		0.000681284	0.0462919	0.00462919		0.000681284	0.0292913	0.00292913
0.000851812	0.0223341	0.00223341		0.000851812	0.0300513	0.00300513		0.000851812	0.0130761	0.00130761
0.00106497	-0.100048	-0.0100048		0.00106497	-0.0925863	-0.00925863		0.00106497	-0.107599	-0.0107599
0.00133142	-0.317752	-0.0317752		0.00133142	-0.313983	-0.0313983		0.00133142	-0.321487	-0.0321487
0.00166448	-0.505352	-0.0505352		0.00166448	-0.505825	-0.0505825		0.00166448	-0.505694	-0.0505694
0.00208081	-0.512851	-0.0512851		0.00208081	-0.513551	-0.0513551		0.00208081	-0.512682	-0.0512682
0.00260121	-0.368001	-0.0368001		0.00260121	-0.368836	-0.0368836		0.00260121	-0.365813	-0.0365813
0.00325172	-0.36888	-0.036888		0.00325172	-0.372363	-0.0372363		0.00325172	-0.364008	-0.0364008
0.00406486	-0.577094	-0.0577094		0.00406486	-0.581193	-0.0581193		0.00406486	-0.573645	-0.0573645
0.00506486	-0.499714	-0.0499714		0.00506486	-0.502656	-0.0502656		0.00506486	-0.495824	-0.0495824
0.00606486	-0.291652	-0.0291652		0.00606486	-0.293481	-0.0293481		0.00606486	-0.288385	-0.0288385
0.00706486	-0.337828	-0.0337828		0.00706486	-0.341552	-0.0341552		0.00706486	-0.334732	-0.0334732
0.00806486	-0.326615	-0.0326615		0.00806486	-0.329695	-0.0329695		0.00806486	-0.322589	-0.0322589
0.00906486	-0.207077	-0.0207077		0.00906486	-0.207055	-0.0207055		0.00906486	-0.206374	-0.0206374
0.0100649	-0.103309	-0.0103309		0.0100649	-0.106123	-0.0106123		0.0100649	-0.101439	-0.0101439
0.0110649	-0.00381528	-0.000381528		0.0110649	-0.00460094	-0.000460094		0.0110649	-0.00189529	-0.000189529
0.0120649	-0.00733127	-0.000733127		0.0120649	-0.00569011	-0.000569011		0.0120649	-0.00879479	-0.000879479
0.0130649	-0.00108896	-0.000108896		0.0130649	-0.00345504	-0.000345504		0.0130649	-0.000335682	-3.35682e-05
0.0140649	0.119576	0.0119576		0.0140649	0.121343	0.0121343		0.0140649	0.119052	0.0119052
0.0150649	0.194781	0.0194781		0.0150649	0.197848	0.0197848		0.0150649	0.192113	0.0192113
0.0160649	0.169158	0.0169158		0.0160649	0.166379	0.0166379		0.0160649	0.169703	0.0169703
0.0170649	0.118655	0.0118655		0.0170649	0.12115	0.012115		0.0170649	0.116748	0.0116748
0.0180649	0.169819	0.0169819		0.0180649	0.174567	0.0174567		0.0180649	0.166074	0.0166074
0.0190649	0.275721	0.0275721		0.0190649	0.273839	0.0273839		0.0190649	0.275959	0.0275959
0.0200649	0.202663	0.0202663		0.0200649	0.203153	0.0203153		0.0200649	0.201863	0.0201863
0.0210649	0.111903	0.0111903		0.0210649	0.11506	0.011506		0.0210649	0.109367	0.0109367
0.0220649	0.228292	0.0228292		0.0220649	0.228839	0.0228839		0.0220649	0.227301	0.0227301
0.0230649	0.283935	0.0283935		0.0230649	0.285545	0.0285545		0.0230649	0.282295	0.0282295
0.0240649	0.177595	0.0177595		0.0240649	0.177836	0.0177836		0.0240649	0.176809	0.0176809
0.0250649	0.145314	0.0145314		0.0250649	0.144576	0.0144576		0.0250649	0.145408	0.0145408
0.0260649	0.190139	0.0190139		0.0260649	0.193996	0.0193996		0.0260649	0.187394	0.0187394
0.0270649	0.206084	0.0206084		0.0270649	0.207177	0.0207177		0.0270649	0.205014	0.0205014
0.0280649	0.166963	0.0166963		0.0280649	0.163565	0.0163565		0.0280649	0.168547	0.0168547
0.0290649	0.0872872	0.00872872		0.0290649	0.0885354	0.00885354		0.0290649	0.0865013	0.00865013
0.0300649	0.0997083	0.00997083		0.0300649	0.102573	0.0102573		0.0300649	0.0986134	0.00986134
0.0310649	0.182909	0.0182909		0.0310649	0.181638	0.0181638		0.0310649	0.183316	0.0183316
0.0320649	0.139656	0.0139656		0.0320649	0.137609	0.0137609		0.0320649	0.14022	0.014022
0.0330649	0.0443106	0.00443106		0.0330649	0.044589	0.0044589		0.0330649	0.0449732	0.00449732
0.0340649	0.083895	0.0083895		0.0340649	0.0856509	0.00856509		0.0340649	0.083586	0.0083586
0.0350649	0.150109	0.0150109		0.0350649	0.150364	0.0150364		0.0350649	0.14907	0.014907
0.0360649	0.0901907	0.00901907		0.0360649	0.0876758	0.00876758		0.0360649	0.0911302	0.00911302
0.0370649	0.00206497	0.000206497		0.0370649	0.00134131	0.000134131		0.0370649	0.00360258	0.000360258
0.0380649	0.0329659	0.00329659		0.0380649	0.0351446	0.00351446		0.0380649	0.0327191	0.00327191
0.0390649	0.123697	0.0123697		0.0390649	0.123192	0.0123192		0.0390649	0.123585	0.0123585
0.0400649	0.0868442	0.00868442		0.0400649	0.084598	0.0084598		0.0400649	0.0869053	0.00869053
0.0410649	-0.0425555	-0.00425555		0.0410649	-0.0422719	-0.00422719		0.0410649	-0.0421895	-0.00421895
0.0420649	-0.0482039	-0.00482039		0.0420649	-0.046739	-0.0046739		0.0420649	-0.0471028	-0.00471028
0.0430649	0.0448129	0.00448129		0.0430649	0.0441591	0.00441591		0.0430649	0.0447436	0.00447436
0.0440649	0.0275215	0.00275215		0.0440649	0.0249164	0.00249164		0.0440649	0.0275461	0.00275461
0.0450649	-0.0919314	-0.00919314		0.0450649	-0.0921512	-0.00921512		0.0450649	-0.0907308	-0.00907308
0.0460649	-0.0872129	-0.00872129		0.0460649	-0.0855541	-0.00855541		0.0460649	-0.0859317	-0.00859317
0.0470649	0.0223105	0.00223105		0.0470649	0.0214193	0.00214193		0.0470649	0.0223787	0.00223787
0.0480649	-0.0110503	-0.00110503		0.0480649	-0.0134712	-0.00134712		0.0480649	-0.011744	-0.0011744
0.0490649	-0.138855	-0.0138855		0.0490649	-0.138686	-0.0138686		0.0490649	-0.138088	-0.0138088
0.0500649	-0.0899103	-0.00899103		0.0500649	-0.0887586	-0.00887586		0.0500649	-0.087292	-0.0087292
0.0510649	0.0780696	0.00780696		0.0510649	0.0766101	0.00766101		0.0510649	0.0789011	0.00789011
0.0520649	0.0489293	0.00489293		0.0520649	0.0474445	0.00474445		0.0520649	0.0462282	0.00462282
0.0530649	-0.0974579	-0.00974579		0.0530649	-0.0958896	-0.00958896		0.0530649	-0.0984162	-0.00984162
0.0540649	-0.0589007	-0.00589007		0.0540649	-0.0567798	-0.00567798		0.0540649	-0.0564091	-0.00564091
0.0550649	0.078131	0.0078131		0.0550649	0.0761814	0.00761814		0.0550649	0.079281	0.0079281
0.0560649	0.0504336	0.00504336		0.0560649	0.0479993	0.00479993		0.0560649	0.0479089	0.00479089
0.0570649	-0.108994	-0.0108994		0.0570649	-0.105481	-0.0105481		0.0570649	-0.111858	-0.0111858
0.0580649	-0.115087	-0.0115087		0.0580649	-0.112197	-0.0112197		0.0580649	-0.112904	-0.0112904
0.0590649	0.0680205	0.00680205		0.0590649	0.0633836	0.00633836		0.0590649	0.0722216	0.00722216
0.0600649	0.0730663	0.00730663		0.0600649	0.0705152	0.00705152		0.0600649	0.0703387	0.00703387
0.0610649	-0.117401	-0.0117401		0.0610649	-0.112254	-0.0112254		0.0610649	-0.12251	-0.012251
0.0620649	-0.103978	-0.0103978		0.0620649	-0.100408	-0.0100408		0.0620649	-0.102114	-0.0102114
0.0630649	0.0762524	0.00762524		0.0630649	0.0713744	0.00713744		0.0630649	0.08136	0.008136
0.0640649	0.0459042	0.00459042		0.0640649	0.0415005	0.00415005		0.0640649	0.0444521	0.00444521
0.0650649	-0.132413	-0.0132413		0.0650649	-0.126794	-0.0126794		0.0650649	-0.138732	-0.0138732
0.0660649	-0.120401	-0.0120401		0.0660649	-0.114203	-0.0114203		0.0660649	-0.120537	-0.0120537
0.0670649	0.0484073	0.00484073		0.0670649	0.0423374	0.00423374		0.0670649	0.0554699	0.00554699
0.0680649	0.0599339	0.00599339		0.0680649	0.0522716	0.00522716		0.0680649	0.0613368	0.00613368
0.0690649	-0.117385	-0.0117385		0.0690649	-0.110563	-0.0110563		0.0690649	-0.125713	-0.0125713
0.0700649	-0.159381	-0.0159381		0.0700649	-0.14998	-0.014998		0.0700649	-0.162605	-0.0162605
0.0710649	-0.000832512	-8.32512e-05		0.0710649	-0.00775724	-0.000775724		0.0710649	0.00802768	0.000802768
0.0720649	0.0388348	0.00388348		0.0720649	0.0273085	0.00273085		0.0720649	0.0441353	0.00441353
0.0730649	-0.156712	-0.0156712		0.0730649	-0.150501	-0.0150501		0.0730649	-0.165505	-0.0165505
0.0740649	-0.181828	-0.0181828		0.0740649	-0.169176	-0.0169176		0.0740649	-0.188007	-0.0188007
0.0750649	0.0175232	0.00175232		0.0750649	0.0120298	0.00120298		0.0750649	0.0259957	0.00259957
0.0760649	0.0413915	0.00413915		0.0760649	0.025738	0.0025738		0.0760649	0.0508073	0.00508073
0.0770649	-0.149798	-0.0149798		0.0770649	-0.14641	-0.014641		0.0770649	-0.157064	-0.0157064
0.0780649	-0.157078	-0.0157078		0.0780649	-0.1391	-0.01391		0.0780649	-0.168505	-0.0168505
0.0790649	0.104989	0.0104989		0.0790649	0.102739	0.0102739		0.0790649	0.111811	0.0111811
0.0800649	0.0967891	0.00967891		0.0800649	0.0768108	0.00768108		0.0800649	0.109619	0.0109619
0.0810649	-0.14531	-0.014531		0.0810649	-0.145823	-0.0145823		0.0810649	-0.149596	-0.0149596
0.0820649	-0.128328	-0.0128328		0.0820649	-0.105784	-0.0105784		0.0820649	-0.144094	-0.0144094
0.0830649	0.126228	0.0126228		0.0830649	0.129052	0.0129052		0.0830649	0.128588	0.0128588
0.0840649	0.133768	0.0133768		0.0840649	0.109796	0.0109796		0.0840649	0.150917	0.0150917
0.0850649	-0.139364	-0.0139364		0.0850649	-0.146285	-0.0146285		0.0850649	-0.138203	-0.0138203
0.0860649	-0.156359	-0.0156359		0.0860649	-0.131363	-0.0131363		0.0860649	-0.174958	-0.0174958
0.0870649	0.0490965	0.00490965		0.0870649	0.060093	0.0060093		0.0870649	0.0434193	0.00434193
0.0880649	0.127409	0.0127409		0.0880649	0.100161	0.0100161		0.0880649	0.149764	0.0149764
0.0890649	-0.0220192	-0.00220192		0.0890649	-0.0392709	-0.00392709		0.0890649	-0.011191	-0.0011191
0.0900649	-0.0727473	-0.00727473		0.0900649	-0.0440579	-0.00440579		0.0900649	-0.0969268	-0.00969268
0.0910649	0.116882	0.0116882		0.0910649	0.140082	0.0140082		0.0910649	0.100372	0.0100372
0.0920649	0.128828	0.0128828		0.0920649	0.0995669	0.00995669		0.0920649	0.152748	0.0152748
0.0930649	-0.115893	-0.0115893		0.0930649	-0.144991	-0.0144991		0.0930649	-0.0938671	-0.00938671
0.0940649	-0.148424	-0.0148424		0.0940649	-0.122538	-0.0122538		0.0940649	-0.169479	-0.0169479
0.0950649	0.0893214	0.00893214		0.0950649	0.124534	0.0124534		0.0950649	0.0608216	0.00608216
0.0960649	0.128467	0.0128467		0.0960649	0.104545	0.0104545		0.0960649	0.147513	0.0147513
0.0970649	-0.140529	-0.0140529		0.0970649	-0.186701	-0.0186701		0.0970649	-0.101568	-0.0101568
0.0980649	-0.134115	-0.0134115		0.0980649	-0.113956	-0.0113956		0.0980649	-0.149458	-0.0149458
0.0990649	0.16453	0.016453		0.0990649	0.218951	0.0218951		0.0990649	0.116286	0.0116286
0.100065	0.177737	0.0177737		0.100065	0.160114	0.0160114		0.100065	0.190576	0.0190576
0.101065	-0.0916864	-0.00916864		0.101065	-0.154715	-0.0154715		0.101065	-0.0355746	-0.00355746
0.102065	-0.126351	-0.0126351		0.102065	-0.113355	-0.0113355		0.102065	-0.135007	-0.0135007
0.103065	0.257073	0.0257073		0.103065	0.327	0.0327		0.103065	0.194288	0.0194288
0.104065	0.205294	0.0205294		0.104065	0.197989	0.0197989		0.104065	0.204341	0.0204341
0.105065	-0.176636	-0.0176636		0.105065	-0.252184	-0.0252184		0.105065	-0.106004	-0.0106004
0.106065	-0.17166	-0.017166		0.106065	-0.175269	-0.0175269		0.106065	-0.16217	-0.016217
0.107065	0.26581	0.026581		0.107065	0.347768	0.0347768		0.107065	0.189448	0.0189448
0.108065	0.249967	0.0249967		0.108065	0.260555	0.0260555		0.108065	0.22898	0.022898
0.109065	-0.124375	-0.0124375		0.109065	-0.209451	-0.0209451		0.109065	-0.0407413	-0.00407413
0.110065	0.0194065	0.00194065		0.110065	0.00219386	0.000219386		0.110065	0.046141	0.0046141
0.111065	0.335506	0.0335506		0.111065	0.422688	0.0422688		0.111065	0.248211	0.0248211
0.112065	0.194763	0.0194763		0.112065	0.218891	0.0218891		0.112065	0.157692	0.0157692
0.113065	-0.249032	-0.0249032		0.113065	-0.331709	-0.0331709		0.113065	-0.166525	-0.0166525
0.114065	-0.142371	-0.0142371		0.114065	-0.178132	-0.0178132		0.114065	-0.0907967	-0.00907967
0.115065	0.16916	0.016916		0.115065	0.242458	0.0242458		0.115065	0.0901301	0.00901301
0.116065	0.156913	0.0156913		0.116065	0.199422	0.0199422		0.116065	0.0983918	0.00983918
0.117065	-0.29908	-0.029908		0.117065	-0.368069	-0.0368069		0.117065	-0.226863	-0.0226863
0.118065	-0.122008	-0.0122008		0.118065	-0.167107	-0.0167107		0.118065	-0.0509486	-0.00509486
0.119065	0.106633	0.0106633		0.119065	0.151872	0.0151872		0.119065	0.0474769	0.00474769
0.120065	0.196278	0.0196278		0.120065	0.245729	0.0245729		0.120065	0.126147	0.0126147
0.121065	-0.334665	-0.0334665		0.121065	-0.368978	-0.0368978		0.121065	-0.295869	-0.0295869
0.122065	-0.100667	-0.0100667		0.122065	-0.138644	-0.0138644		0.122065	-0.0207495	-0.00207495
0.123065	0.279554	0.0279554		0.123065	0.27641	0.027641		0.123065	0.26394	0.026394
0.124065	0.02981	0.002981		0.124065	0.0553693	0.00553693		0.124065	-0.0336037	-0.00336037
0.125065	-0.549336	-0.0549336		0.125065	-0.525336	-0.0525336		0.125065	-0.563505	-0.0563505
0.126065	-0.394204	-0.0394204		0.126065	-0.398849	-0.0398849		0.126065	-0.332429	-0.0332429
0.127065	0.0250369	0.00250369		0.127065	-0.0640534	-0.00640534		0.127065	0.0918406	0.00918406
0.128065	-0.0402764	-0.00402764		0.128065	-0.0836952	-0.00836952		0.128065	-0.0530892	-0.00530892
0.129065	-0.526143	-0.0526143		0.129065	-0.394654	-0.0394654		0.129065	-0.634548	-0.0634548
0.130065	-0.623446	-0.0623446		0.130065	-0.5358	-0.05358		0.130065	-0.631463	-0.0631463
0.131065	0.323432	0.0323432		0.131065	0.117274	0.0117274		0.131065	0.514056	0.0514056
0.132065	-0.306505	-0.0306505		0.132065	-0.48556	-0.048556		0.132065	-0.20926	-0.020926
0.133065	-0.54611	-0.054611		0.133065	-0.255846	-0.0255846		0.133065	-0.781956	-0.0781956
0.134065	-1.42305	-0.142305		0.134065	-1.15166	-0.115166		0.134065	-1.56848	-0.156848
0.135065	0.471922	0.0471922		0.135065	0.161719	0.0161719		0.135065	0.82988	0.082988
0.136065	-0.233716	-0.0233716		0.136065	-0.620539	-0.0620539		0.136065	0.117627	0.0117627
0.137065	-0.475937	-0.0475937		0.137065	0.0679433	0.00679433		0.137065	-0.952048	-0.0952048
0.138065	-1.61945	-0.161945		0.138065	-0.855873	-0.0855873		0.138065	-2.11367	-0.211367
0.139065	0.208215	0.0208215		0.139065	0.14376	0.014376		0.139065	0.978119	0.0978119
0.140065	-0.55127	-0.055127		0.140065	-0.65886	-0.065886		0.140065	0.291537	0.0291537
0.141065	-1.8633	-0.18633		0.141065	-1.00491	-0.100491		0.141065	-3.56951	-0.356951
0.142065	0.244353	0.0244353		0.142065	1.33654	0.133654		0.142065	-3.37329	-0.337329
0.143065	-2.11437	-0.211437		0.143065	-1.69891	-0.169891		0.143065	-2.74315	-0.274315
0.144065	2.20503	0.220503		0.144065	1.82329	0.182329		0.144065	2.50623	0.250623
0.145065	-0.962597	-0.0962597		0.145065	-0.463697	-0.0463697		0.145065	-0.79041	-0.079041
0.146065	-0.0453109	-0.00453109		0.146065	0.522308	0.0522308		0.146065	-0.554523	-0.0554523
0.147065	1.13153	0.113153		0.147065	0.703371	0.0703371		0.147065	1.95859	0.195859
0.148065	1.35135	0.135135		0.148065	0.59912	0.059912		0.148065	2.08528	0.208528
0.149065	0.711917	0.0711917		0.149065	0.116554	0.0116554		0.149065	1.6292	0.16292
0.150065	2.19071	0.219071		0.150065	1.50932	0.150932		0.150065	2.94365	0.294365
0.151065	0.979135	0.0979135		0.151065	0.447703	0.0447703		0.151065	1.649	0.1649
0.152065	1.99241	0.199241		0.152065	1.07794	0.107794		0.152065	2.95977	0.295977
0.153065	0.517253	0.0517253		0.153065	-0.375605	-0.0375605		0.153065	1.60741	0.160741
0.154065	4.44028	0.444028		0.154065	2.8892	0.28892		0.154065	6.1737	0.61737
0.155065	0.885032	0.0885032		0.155065	0.768587	0.0768587		0.155065	1.05713	0.105713
0.156065	1.76171	0.176171		0.156065	1.43977	0.143977		0.156065	2.39747	0.239747
0.157065	-0.952564	-0.0952564		0.157065	-1.22408	-0.122408		0.157065	0.277435	0.0277435
0.158065	3.78805	0.378805		0.158065	3.03977	0.303977		0.158065	5.67603	0.567603
0.159065	-2.52703	-0.252703		0.159065	-1.36194	-0.136194		0.159065	-4.34614	-0.434614
0.160065	0.716641	0.0716641		0.160065	1.30945	0.130945		0.160065	-2.3681	-0.23681
0.161065	-1.04993	-0.104993		0.161065	-0.798424	-0.0798424		0.161065	-1.80167	-0.180167
0.162065	0.623615	0.0623615		0.162065	0.554829	0.0554829		0.162065	0.590985	0.0590985
0.163065	-1.33059	-0.133059		0.163065	-0.335865	-0.0335865		0.163065	-2.02417	-0.202417
0.164065	-1.25897	-0.125897		0.164065	-0.539802	-0.0539802		0.164065	-1.93732	-0.193732
0.165065	-0.976061	-0.0976061		0.165065	-1.00039	-0.100039		0.165065	-0.714895	-0.0714895
0.166065	1.35033	0.135033		0.166065	1.24245	0.124245		0.166065	1.46083	0.146083
0.167065	-1.25402	-0.125402		0.167065	-0.79989	-0.079989		0.167065	-1.57612	-0.157612
0.168065	-0.888649	-0.0888649		0.168065	-0.692617	-0.0692617		0.168065	-1.01324	-0.101324
0.169065	-0.212473	-0.0212473		0.169065	-0.405549	-0.0405549		0.169065	0.0570028	0.00570028
0.170065	0.90655	0.090655		0.170065	0.907234	0.0907234		0.170065	0.894982	0.0894982
0.171065	-0.950681	-0.0950681		0.171065	-0.724945	-0.0724945		0.171065	-1.12731	-0.112731
0.172065	-0.308009	-0.0308009		0.172065	-0.334186	-0.0334186		0.172065	-0.242888	-0.0242888
0.173065	-0.166024	-0.0166024		0.173065	-0.33994	-0.033994		0.173065	-0.0106358	-0.00106358
0.174065	0.677256	0.0677256		0.174065	0.788884	0.0788884		0.174065	0.57106	0.057106
0.175065	-0.652567	-0.0652567		0.175065	-0.552602	-0.0552602		0.175065	-0.73024	-0.073024
0.176065	-0.424065	-0.0424065		0.176065	-0.54635	-0.054635		0.176065	-0.277843	-0.0277843
0.177065	0.250462	0.0250462		0.177065	0.165028	0.0165028		0.177065	0.294104	0.0294104
0.178065	0.158429	0.0158429		0.178065	0.304541	0.0304541		0.178065	0.0194367	0.00194367
0.179065	-0.481548	-0.0481548		0.179065	-0.457394	-0.0457394		0.179065	-0.477594	-0.0477594
0.180065	-0.548811	-0.0548811		0.180065	-0.699426	-0.0699426		0.180065	-0.394356	-0.0394356
0.181065	0.326666	0.0326666		0.181065	0.317128	0.0317128		0.181065	0.298381	0.0298381
0.182065	0.343569	0.0343569		0.182065	0.492435	0.0492435		0.182065	0.207625	0.0207625
0.183065	-0.253473	-0.0253473		0.183065	-0.276516	-0.0276516		0.183065	-0.197004	-0.0197004
0.184065	-0.55786	-0.055786		0.184065	-0.700506	-0.0700506		0.184065	-0.433218	-0.0433218
0.185065	0.297415	0.0297415		0.185065	0.336935	0.0336935		0.185065	0.230473	0.0230473
0.186065	0.370312	0.0370312		0.186065	0.496459	0.0496459		0.186065	0.260731	0.0260731
0.187065	-0.335038	-0.0335038		0.187065	-0.395579	-0.0395579		0.187065	-0.244367	-0.0244367
0.188065	-0.466601	-0.0466601		0.188065	-0.575408	-0.0575408		0.188065	-0.38439	-0.038439
0.189065	0.230057	0.0230057		0.189065	0.295888	0.0295888		0.189065	0.142747	0.0142747
0.190065	0.238605	0.0238605		0.190065	0.323681	0.0323681		0.190065	0.174477	0.0174477
0.191065	-0.373132	-0.0373132		0.191065	-0.443729	-0.0443729		0.191065	-0.278328	-0.0278328
0.192065	-0.242473	-0.0242473		0.192065	-0.312647	-0.0312647		0.192065	-0.199373	-0.0199373
0.193065	0.285203	0.0285203		0.193065	0.356364	0.0356364		0.193065	0.195125	0.0195125
0.194065	0.149923	0.0149923		0.194065	0.199814	0.0199814		0.194065	0.124533	0.0124533
0.195065	-0.410958	-0.0410958		0.195065	-0.478966	-0.0478966		0.195065	-0.326934	-0.0326934
0.196065	-0.280456	-0.0280456		0.196065	-0.319894	-0.0319894		0.196065	-0.267783	-0.0267783
0.197065	0.250906	0.0250906		0.197065	0.313721	0.0313721		0.197065	0.175049	0.0175049
0.198065	0.187752	0.0187752		0.198065	0.212262	0.0212262		0.198065	0.189182	0.0189182
0.199065	-0.458865	-0.0458865		0.199065	-0.516667	-0.0516667		0.199065	-0.393169	-0.0393169
0.200065	-0.31065	-0.031065		0.200065	-0.326045	-0.0326045		0.200065	-0.318907	-0.0318907
0.201065	0.248825	0.0248825		0.201065	0.296379	0.0296379		0.201065	0.192108	0.0192108
0.202065	0.0857462	0.00857462		0.202065	0.0921939	0.00921939		0.202065	0.104289	0.0104289
0.203065	-0.346835	-0.0346835		0.203065	-0.388362	-0.0388362		0.203065	-0.300101	-0.0300101
0.204065	-0.235461	-0.0235461		0.204065	-0.235132	-0.0235132		0.204065	-0.259834	-0.0259834
0.205065	0.198299	0.0198299		0.205065	0.229405	0.0229405		0.205065	0.16317	0.016317
0.206065	0.0692383	0.00692383		0.206065	0.0645212	0.00645212		0.206065	0.0962481	0.00962481
0.207065	-0.373388	-0.0373388		0.207065	-0.397948	-0.0397948		0.207065	-0.346853	-0.0346853
0.208065	-0.178036	-0.0178036		0.208065	-0.171567	-0.0171567		0.208065	-0.205316	-0.0205316
0.209065	0.282643	0.0282643		0.209065	0.299985	0.0299985		0.209065	0.263831	0.0263831
0.210065	0.0838766	0.00838766		0.210065	0.0754744	0.00754744		0.210065	0.111845	0.0111845
0.211065	-0.333612	-0.0333612		0.211065	-0.343739	-0.0343739		0.211065	-0.323994	-0.0323994
0.212065	-0.10007	-0.010007		0.212065	-0.091601	-0.0091601		0.212065	-0.126634	-0.0126634
0.213065	0.277468	0.0277468		0.213065	0.280992	0.0280992		0.213065	0.274538	0.0274538
0.214065	0.00203981	0.000203981		0.214065	-0.00457184	-0.000457184		0.214065	0.0251057	0.00251057
0.215065	-0.321764	-0.0321764		0.215065	-0.321624	-0.0321624		0.215065	-0.323399	-0.0323399
0.216065	-0.0734949	-0.00734949		0.216065	-0.0687925	-0.00687925		0.216065	-0.0935362	-0.00935362
0.217065	0.258166	0.0258166		0.217065	0.2537	0.02537		0.217065	0.264597	0.0264597
0.218065	-0.00960898	-0.000960898		0.218065	-0.0123676	-0.00123676		0.218065	0.00640148	0.000640148
0.219065	-0.340975	-0.0340975		0.219065	-0.334224	-0.0334224		0.219065	-0.349365	-0.0349365
0.220065	-0.0405591	-0.00405591		0.220065	-0.0406818	-0.00406818		0.220065	-0.0529361	-0.00529361
0.221065	0.294092	0.0294092		0.221065	0.28466	0.028466		0.221065	0.305028	0.0305028
0.222065	0.0237159	0.00237159		0.222065	0.0267767	0.00267767		0.222065	0.03255	0.003255
0.223065	-0.241221	-0.0241221		0.223065	-0.230771	-0.0230771		0.223065	-0.253494	-0.0253494
0.224065	0.0360782	0.00360782		0.224065	0.0311259	0.00311259		0.224065	0.0294299	0.00294299
0.225065	0.24364	0.024364		0.225065	0.233012	0.0233012		0.225065	0.256105	0.0256105
0.226065	-0.0239625	-0.00239625		0.226065	-0.0168282	-0.00168282		0.226065	-0.0202429	-0.00202429
0.227065	-0.207535	-0.0207535		0.227065	-0.197188	-0.0197188		0.227065	-0.220081	-0.0220081
0.228065	0.0641997	0.00641997		0.228065	0.0545849	0.00545849		0.228065	0.0637568	0.00637568
0.229065	0.232964	0.0232964		0.229065	0.224003	0.0224003		0.229065	0.244084	0.0244084
0.230065	-0.0525625	-0.00525625		0.230065	-0.041939	-0.0041939		0.230065	-0.0541469	-0.00541469
0.231065	-0.216531	-0.0216531		0.231065	-0.208963	-0.0208963		0.231065	-0.225951	-0.0225951
0.232065	0.0812127	0.00812127		0.232065	0.0694415	0.00694415		0.232065	0.0844942	0.00844942
0.233065	0.247765	0.0247765		0.233065	0.240718	0.0240718		0.233065	0.25641	0.025641
0.234065	-0.0412973	-0.00412973		0.234065	-0.0285296	-0.00285296		0.234065	-0.0458454	-0.00458454
0.235065	-0.184194	-0.0184194		0.235065	-0.178408	-0.0178408		0.235065	-0.191563	-0.0191563
0.236065	0.112123	0.0112123		0.236065	0.0985095	0.00985095		0.236065	0.117682	0.0117682
0.237065	0.232809	0.0232809		0.237065	0.228668	0.0228668		0.237065	0.238476	0.0238476
0.238065	-0.0643721	-0.00643721		0.238065	-0.0504444	-0.00504444		0.238065	-0.0703811	-0.00703811
0.239065	-0.141381	-0.0141381		0.239065	-0.139228	-0.0139228		0.239065	-0.145174	-0.0145174
0.240065	0.181395	0.0181395		0.240065	0.167674	0.0167674		0.240065	0.187408	0.0187408
0.241065	0.265629	0.0265629		0.241065	0.265374	0.0265374		0.241065	0.26787	0.026787
0.242065	-0.0610674	-0.00610674		0.242065	-0.0470581	-0.00470581		0.242065	-0.0682502	-0.00682502
0.243065	-0.168169	-0.0168169		0.243065	-0.169091	-0.0169091		0.243065	-0.169419	-0.0169419
0.244065	0.101918	0.0101918		0.244065	0.0891659	0.00891659		0.244065	0.108182	0.0108182
0.245065	0.162437	0.0162437		0.245065	0.163843	0.0163843		0.245065	0.163147	0.0163147
0.246065	-0.091629	-0.0091629		0.246065	-0.0805938	-0.00805938		0.246065	-0.0961916	-0.00961916
0.247065	-0.127395	-0.0127395		0.247065	-0.129641	-0.0129641		0.247065	-0.127137	-0.0127137
0.248065	0.151705	0.0151705		0.248065	0.140691	0.0140691		0.248065	0.156553	0.0156553
0.249065	0.203836	0.0203836		0.249065	0.207002	0.0207002		0.249065	0.202639	0.0202639
0.250065	-0.074055	-0.0074055		0.250065	-0.0634133	-0.00634133		0.250065	-0.078717	-0.0078717
0.251065	-0.125935	-0.0125935		0.251065	-0.129525	-0.0129525		0.251065	-0.124636	-0.0124636
0.252065	0.131299	0.0131299		0.252065	0.121719	0.0121719		0.252065	0.13504	0.013504
0.253065	0.160625	0.0160625		0.253065	0.16478	0.016478		0.253065	0.159044	0.0159044
0.254065	-0.0952237	-0.00952237		0.254065	-0.0865525	-0.00865525		0.254065	-0.0983999	-0.00983999
0.255065	-0.110077	-0.0110077		0.255065	-0.114941	-0.0114941		0.255065	-0.107994	-0.0107994
0.256065	0.151451	0.0151451		0.256065	0.143627	0.0143627		0.256065	0.15438	0.015438
0.257065	0.160235	0.0160235		0.257065	0.165807	0.0165807		0.257065	0.157367	0.0157367
0.258065	-0.108598	-0.0108598		0.258065	-0.101749	-0.0101749		0.258065	-0.111103	-0.0111103
0.259065	-0.117443	-0.0117443		0.259065	-0.123086	-0.0123086		0.259065	-0.114361	-0.0114361
0.260065	0.128434	0.0128434		0.260065	0.123142	0.0123142		0.260065	0.129541	0.0129541
0.261065	0.0998043	0.00998043		0.261065	0.104985	0.0104985		0.261065	0.0971196	0.00971196
0.262065	-0.157352	-0.0157352		0.262065	-0.15273	-0.015273		0.262065	-0.158094	-0.0158094
0.263065	-0.161239	-0.0161239		0.263065	-0.165912	-0.0165912		0.263065	-0.159038	-0.0159038
0.264065	0.0448888	0.00448888		0.264065	0.0403341	0.00403341		0.264065	0.0457722	0.00457722
0.265065	0.0448707	0.00448707		0.265065	0.0483688	0.00483688		0.265065	0.0439982	0.00439982
0.266065	-0.148949	-0.0148949		0.266065	-0.145534	-0.0145534		0.266065	-0.14857	-0.014857
0.267065	-0.11741	-0.011741		0.267065	-0.121777	-0.0121777		0.267065	-0.115525	-0.0115525
0.268065	0.119084	0.0119084		0.268065	0.11547	0.011547		0.268065	0.119148	0.0119148
0.269065	0.0939658	0.00939658		0.269065	0.0984495	0.00984495		0.269065	0.0920607	0.00920607
0.270065	-0.124762	-0.0124762		0.270065	-0.121723	-0.0121723		0.270065	-0.124482	-0.0124482
0.271065	-0.0792781	-0.00792781		0.271065	-0.0835515	-0.00835515		0.271065	-0.0778187	-0.00778187
0.272065	0.118474	0.0118474		0.272065	0.116519	0.0116519		0.272065	0.117357	0.0117357
0.273065	0.0596676	0.00596676		0.273065	0.0637205	0.00637205		0.273065	0.0585472	0.00585472
0.274065	-0.132745	-0.0132745		0.274065	-0.13111	-0.013111		0.274065	-0.131929	-0.0131929
0.275065	-0.0886752	-0.00886752		0.275065	-0.0922342	-0.00922342		0.275065	-0.0879473	-0.00879473
0.276065	0.0933645	0.00933645		0.276065	0.0917679	0.00917679		0.276065	0.0930935	0.00930935
0.277065	0.063208	0.0063208		0.277065	0.0660062	0.00660062		0.277065	0.0629574	0.00629574
0.278065	-0.0907597	-0.00907597		0.278065	-0.0897619	-0.00897619		0.278065	-0.090031	-0.0090031
0.279065	-0.0504912	-0.00504912		0.279065	-0.0524638	-0.00524638		0.279065	-0.0508544	-0.00508544
0.280065	0.0896156	0.00896156		0.280065	0.0887726	0.00887726		0.280065	0.0887325	0.00887325
0.281065	0.0462092	0.00462092		0.281065	0.0481539	0.00481539		0.281065	0.0464028	0.00464028
0.282065	-0.100569	-0.0100569		0.282065	-0.099317	-0.0099317		0.282065	-0.100228	-0.0100228
0.283065	-0.0704152	-0.00704152		0.283065	-0.0725128	-0.00725128		0.283065	-0.0704206	-0.00704206
0.284065	0.068546	0.0068546		0.284065	0.0674677	0.00674677		0.284065	0.0681841	0.00681841
0.285065	0.0315121	0.00315121		0.285065	0.0335069	0.00335069		0.285065	0.031629	0.0031629
0.286065	-0.106371	-0.0106371		0.286065	-0.105783	-0.0105783		0.286065	-0.105759	-0.0105759
0.287065	-0.0764232	-0.00764232		0.287065	-0.0780873	-0.00780873		0.287065	-0.0767866	-0.00767866
0.288065	0.0364783	0.00364783		0.288065	0.0360669	0.00360669		0.288065	0.0359322	0.00359322
0.289065	0.0026759	0.00026759		0.289065	0.00348397	0.000348397		0.289065	0.00376503	0.000376503
0.290065	-0.101272	-0.0101272		0.290065	-0.101244	-0.0101244		0.290065	-0.100357	-0.0100357
0.291065	-0.063375	-0.0063375		0.291065	-0.0645115	-0.00645115		0.291065	-0.0638616	-0.00638616
0.292065	0.0465613	0.00465613		0.292065	0.045813	0.0045813		0.292065	0.0465355	0.00465355
0.293065	0.0350255	0.00350255		0.293065	0.0356861	0.00356861		0.293065	0.0359323	0.00359323
0.294065	-0.0521538	-0.00521538		0.294065	-0.0517348	-0.00517348		0.294065	-0.0517108	-0.00517108
0.295065	-0.0444935	-0.00444935		0.295065	-0.045986	-0.0045986		0.295065	-0.0443589	-0.00443589
0.296065	0.10782	0.010782		0.296065	0.106597	0.0106597		0.296065	0.108238	0.0108238
0.297065	0.150279	0.0150279		0.297065	0.151485	0.0151485		0.297065	0.150814	0.0150814
0.298065	-0.00146539	-0.000146539		0.298065	-0.00107284	-0.000107284		0.298065	-0.0012186	-0.00012186
0.299065	0.0683369	0.00683369		0.299065	0.0666104	0.00666104		0.299065	0.0681458	0.00681458
0.3	0.272402	0.0272402		0.3	0.272413	0.0272413		0.3	0.272458	0.0272458
